# Supplementary material for: Assessment of Four Theoretical Approaches to Predict Protein Flexibility in the Crystal Phase and Solution
Source: PubMed Central journal article supplement (PMC11391579; doi:10.1021/acs.jctc.4c00754), 2024-08-22
Supplement: ct4c00754_si_001.pdf [file ct4c00754_si_001.pdf]

**Table S1.** A list of the structures of benchmark proteins selected for this study with the respective numbers of residues in the sequence (#res), the numbers of residues after truncation (#res.t), and the ranges of residues after truncation (range<sub>t</sub>). The entries are grouped according to secondary-structure class. PDB codes in boldface font correspond to NMR structures, those in regular font correspond to X-ray structures.

| <b><math>\alpha</math> proteins</b> |               |               |                          | <b><math>\beta</math> proteins</b> |               |               |                          | <b><math>\alpha+\beta</math> proteins</b> |               |               |                          |
|-------------------------------------|---------------|---------------|--------------------------|------------------------------------|---------------|---------------|--------------------------|-------------------------------------------|---------------|---------------|--------------------------|
| <b>PDB ID<sup>a</sup></b>           | <b># res.</b> | <b>#res.t</b> | <b>range<sub>t</sub></b> | <b>PDB ID<sup>a</sup></b>          | <b># res.</b> | <b>#res.t</b> | <b>range<sub>t</sub></b> | <b>PDB ID<sup>a</sup></b>                 | <b># res.</b> | <b>#res.t</b> | <b>range<sub>t</sub></b> |
| <b>1A6S</b>                         | 87            | 87            | 1-87                     | <b>1AH9</b>                        | 71            | 63            | 5-67                     | 1A80                                      | 277           | 276           | 2-277                    |
| <b>1ACP</b>                         | 77            | 71            | 3-73                     | 1BK2                               | 57            | 55            | 2-56                     | 1ADG                                      | 374           | 373           | 2-374                    |
| 1ALA                                | 316           | 316           | 1-316                    | 1CSP                               | 67            | 67            | 1-67                     | 1AKY                                      | 218           | 216           | 2-217                    |
| 1AUM                                | 70            | 70            | 1-70                     | <b>1ED7</b>                        | 45            | 45            | 1-45                     | 1CFJ                                      | 532           | 530           | 1-530                    |
| <b>1BAL</b>                         | 51            | 33            | 16-48                    | <b>1HRF</b>                        | 67            | 45            | 7-51                     | <b>1CLB</b>                               | 75            | 72            | 2-73                     |
| 1ENH                                | 54            | 48            | 4-51                     | <b>1IYV</b>                        | 79            | 71            | 3-73                     | 1CTF                                      | 68            | 68            | 1-68                     |
| <b>1EO0</b>                         | 77            | 73            | 2-73                     | 1MJC                               | 69            | 69            | 1-69                     | <b>1E0G</b>                               | 48            | 46            | 2-47                     |
| <b>1FEX</b>                         | 59            | 54            | 5-58                     | 1NOA                               | 113           | 113           | 1-113                    | 1EM7                                      | 56            | 56            | 1-56                     |
| <b>1GAB</b>                         | 53            | 44            | 9-52                     | 1RUW                               | 69            | 69            | 1-69                     | <b>1G6E</b>                               | 87            | 86            | 2-87                     |

|             |     |     |       |             |     |     |       |             |     |     |       |
|-------------|-----|-----|-------|-------------|-----|-----|-------|-------------|-----|-----|-------|
| <b>1HNS</b> | 47  | 39  | 6-44  | 1TEN        | 89  | 89  | 1-89  | <b>1GHH</b> | 81  | 80  | 1-79  |
| 1HYP        | 75  | 73  | 1-73  | <b>1TPN</b> | 50  | 43  | 5-47  | <b>1HYW</b> | 58  | 52  | 3-52  |
| <b>1IYR</b> | 83  | 72  | 4-75  | <b>1WIU</b> | 93  | 93  | 1-93  | 1IG5        | 75  | 75  | 1-75  |
| <b>1J7O</b> | 76  | 71  | 5-75  | <b>1WKT</b> | 88  | 85  | 4-88  | <b>1IQO</b> | 88  | 87  | 2-88  |
| 1K40        | 126 | 124 | 3-126 | 1XCD        | 305 | 305 | 1-305 | <b>1K8B</b> | 52  | 51  | 1-51  |
| <b>1L2Y</b> | 20  | 18  | 2-19  | <b>2K9G</b> | 73  | 62  | 9-70  | <b>1LEB</b> | 72  | 66  | 4-69  |
| <b>1LQ7</b> | 67  | 65  | 3-67  | <b>2KYW</b> | 87  | 78  | 2-79  | 1OGQ        | 313 | 310 | 3-312 |
| <b>1P68</b> | 102 | 98  | 4-101 | <b>2LGN</b> | 66  | 65  | 2-66  | 1OIX        | 168 | 168 | 1-168 |
| <b>1POU</b> | 71  | 66  | 5-70  | <b>2LVC</b> | 90  | 87  | 4-90  | 1OPD        | 85  | 81  | 1-81  |
| <b>1PRV</b> | 56  | 36  | 5-40  | 3PUC        | 98  | 97  | 1-97  | 1PGA        | 56  | 56  | 1-56  |
| <b>1RIJ</b> | 23  | 17  | 5-21  | 4F98        | 62  | 60  | 3-62  | 1PHT        | 83  | 83  | 1-83  |
| 1ROP        | 56  | 56  | 1-56  | 4M9O        | 97  | 95  | 1-95  | 1PTF        | 87  | 86  | 1-86  |

|             |     |     |        |  |  |  |  |             |     |     |       |
|-------------|-----|-----|--------|--|--|--|--|-------------|-----|-----|-------|
| 1YRF        | 35  | 34  | 1-34   |  |  |  |  | 1QRE        | 210 | 208 | 3-210 |
| 2BF9        | 36  | 34  | 1-34   |  |  |  |  | <b>1STU</b> | 68  | 66  | 1-66  |
| <b>2CRB</b> | 97  | 69  | 11-79  |  |  |  |  | 1THX        | 108 | 104 | 3-106 |
| <b>2E7N</b> | 117 | 108 | 10-117 |  |  |  |  | 1TIG        | 88  | 87  | 1-87  |
| <b>2HEP</b> | 42  | 23  | 8-30   |  |  |  |  | 1UBQ        | 76  | 71  | 1-71  |
| <b>2HI3</b> | 73  | 47  | 9-55   |  |  |  |  | <b>1VIG</b> | 71  | 67  | 4-70  |
| 2YGS        | 92  | 91  | 1-91   |  |  |  |  | 2ACY        | 98  | 93  | 5-97  |
| 3ICB        | 75  | 74  | 1-75   |  |  |  |  | <b>2BBY</b> | 69  | 62  | 5-66  |
| 3WFW        | 138 | 134 | 1-134  |  |  |  |  | <b>2FMR</b> | 65  | 64  | 2-65  |
|             |     |     |        |  |  |  |  | <b>2L09</b> | 62  | 48  | 3-50  |
|             |     |     |        |  |  |  |  | 2LZM        | 164 | 162 | 1-162 |
|             |     |     |        |  |  |  |  | <b>2M6Q</b> | 91  | 82  | 2-83  |

|  |  |  |  |  |  |  |  |             |     |     |       |
|--|--|--|--|--|--|--|--|-------------|-----|-----|-------|
|  |  |  |  |  |  |  |  | <b>2MQ8</b> | 112 | 97  | 1-97  |
|  |  |  |  |  |  |  |  | <b>2N2U</b> | 77  | 63  | 3-65  |
|  |  |  |  |  |  |  |  | <b>2PTL</b> | 78  | 59  | 19-77 |
|  |  |  |  |  |  |  |  | <b>2RGF</b> | 97  | 97  | 1-97  |
|  |  |  |  |  |  |  |  | <b>3CI2</b> | 64  | 63  | 2-64  |
|  |  |  |  |  |  |  |  | 3E8Y        | 30  | 29  | 1-29  |
|  |  |  |  |  |  |  |  | 3KYW        | 54  | 53  | 1-53  |
|  |  |  |  |  |  |  |  | 3KYY        | 54  | 53  | 1-53  |
|  |  |  |  |  |  |  |  | <b>3NCM</b> | 92  | 92  | 1-92  |
|  |  |  |  |  |  |  |  | 4N6T        | 79  | 79  | 1-79  |
|  |  |  |  |  |  |  |  | 4OZU        | 390 | 389 | 2-390 |
|  |  |  |  |  |  |  |  | 4QRL        | 110 | 110 | 1-110 |

|  |  |  |  |  |  |  |  |      |     |     |       |
|--|--|--|--|--|--|--|--|------|-----|-----|-------|
|  |  |  |  |  |  |  |  | 4R7E | 69  | 69  | 1-69  |
|  |  |  |  |  |  |  |  | 4RTE | 124 | 123 | 2-124 |
|  |  |  |  |  |  |  |  | 5D14 | 70  | 68  | 1-68  |
|  |  |  |  |  |  |  |  | 6DNB | 411 | 409 | 1-410 |

**Table S2.** The Pearson ( $r_p$ ) and Spearman ( $r_s$ ) correlation coefficients of the RMSF profiles over the truncated structures calculated from B-factors (X-ray structures) or NMR ensembles (NMR structures) and those predicted with UNRES-flex, UNRES-DSSP-flex, CABS-flex, and NOLB, respectively.

| # | PDB ID | UNRES-flex |       | UNRES-DSSP-flex |       | CABS-flex |       | NOLB  |       |
|---|--------|------------|-------|-----------------|-------|-----------|-------|-------|-------|
|   |        | $r_s$      | $r_p$ | $r_s$           | $r_p$ | $r_s$     | $r_p$ | $r_s$ | $r_p$ |
| 1 | 1A6S   | 0.52       | 0.34  | 0.59            | 0.56  | 0.75      | 0.81  | 0.17  | -0.08 |
| 2 | 1A80   | 0.42       | 0.40  | 0.49            | 0.44  | 0.59      | 0.50  | 0.67  | 0.66  |
| 3 | 1ACP   | 0.22       | 0.20  | 0.46            | 0.35  | 0.42      | 0.38  | 0.22  | 0.22  |
| 4 | 1ADG   | 0.31       | 0.30  | 0.36            | 0.31  | 0.45      | 0.41  | 0.45  | 0.40  |
| 5 | 1AH9   | 0.71       | 0.65  | 0.74            | 0.72  | 0.79      | 0.68  | 0.21  | 0.21  |
| 6 | 1AKY   | 0.40       | 0.38  | 0.44            | 0.58  | 0.52      | 0.73  | 0.71  | 0.73  |
| 7 | 1ALA   | 0.47       | 0.43  | 0.58            | 0.54  | 0.52      | 0.49  | 0.55  | 0.48  |
| 8 | 1AUM   | 0.40       | 0.24  | 0.52            | 0.43  | 0.28      | 0.11  | 0.44  | 0.46  |

|    |      |       |       |       |       |      |       |       |       |
|----|------|-------|-------|-------|-------|------|-------|-------|-------|
| 9  | 1BAL | 0.27  | 0.26  | 0.32  | 0.27  | 0.05 | -0.08 | 0.08  | -0.05 |
| 10 | 1BK2 | 0.36  | 0.22  | 0.14  | 0.05  | 0.37 | 0.22  | 0.47  | 0.54  |
| 11 | 1CFJ | 0.53  | 0.53  | 0.56  | 0.59  | 0.37 | 0.40  | 0.68  | 0.67  |
| 12 | 1CLB | 0.33  | 0.30  | 0.56  | 0.58  | 0.81 | 0.88  | 0.09  | -0.08 |
| 13 | 1CSP | 0.41  | 0.49  | 0.50  | 0.51  | 0.50 | 0.45  | 0.28  | 0.28  |
| 14 | 1CTF | 0.29  | 0.27  | 0.38  | 0.36  | 0.10 | 0.05  | 0.41  | 0.40  |
| 15 | 1E0G | 0.42  | 0.62  | 0.58  | 0.66  | 0.61 | 0.73  | 0.28  | 0.14  |
| 16 | 1ED7 | 0.49  | 0.45  | 0.59  | 0.53  | 0.33 | 0.22  | 0.00  | -0.02 |
| 17 | 1EM7 | 0.31  | 0.28  | 0.46  | 0.42  | 0.52 | 0.53  | 0.69  | 0.61  |
| 18 | 1ENH | 0.52  | 0.62  | 0.39  | 0.51  | 0.48 | 0.51  | 0.35  | 0.34  |
| 19 | 1EO0 | 0.29  | 0.36  | 0.33  | 0.41  | 0.31 | 0.37  | 0.30  | 0.34  |
| 20 | 1FEX | 0.50  | 0.39  | 0.64  | 0.46  | 0.54 | 0.40  | -0.13 | -0.21 |
| 21 | 1G6E | 0.59  | 0.43  | 0.69  | 0.53  | 0.46 | 0.41  | 0.48  | 0.33  |
| 22 | 1GAB | 0.20  | 0.16  | 0.22  | 0.18  | 0.39 | 0.38  | 0.57  | 0.46  |
| 23 | 1GHH | 0.28  | 0.35  | 0.40  | 0.52  | 0.21 | 0.36  | 0.07  | 0.09  |
| 24 | 1HNS | 0.53  | 0.49  | 0.67  | 0.66  | 0.81 | 0.81  | 0.16  | 0.16  |
| 25 | 1HRF | -0.18 | -0.12 | -0.18 | -0.12 | 0.25 | 0.43  | 0.45  | 0.45  |
| 26 | 1HYP | 0.72  | 0.62  | 0.62  | 0.54  | 0.69 | 0.54  | 0.60  | 0.57  |
| 27 | 1HYW | 0.60  | 0.57  | 0.58  | 0.56  | 0.64 | 0.60  | -0.03 | -0.02 |
| 28 | 1IG5 | 0.77  | 0.62  | 0.78  | 0.75  | 0.75 | 0.61  | 0.76  | 0.74  |
| 29 | 1IQO | 0.41  | 0.32  | 0.56  | 0.44  | 0.62 | 0.50  | 0.18  | 0.06  |

|    |      |      |      |      |      |       |       |       |       |
|----|------|------|------|------|------|-------|-------|-------|-------|
| 30 | 1IYR | 0.21 | 0.53 | 0.52 | 0.61 | 0.69  | 0.74  | 0.44  | 0.07  |
| 31 | 1IYV | 0.47 | 0.42 | 0.47 | 0.42 | 0.63  | 0.67  | 0.12  | 0.33  |
| 32 | 1J7O | 0.17 | 0.11 | 0.09 | 0.05 | -0.37 | -0.29 | 0.23  | 0.04  |
| 33 | 1K40 | 0.78 | 0.78 | 0.82 | 0.85 | 0.68  | 0.64  | 0.55  | 0.55  |
| 34 | 1K8B | 0.34 | 0.31 | 0.46 | 0.43 | 0.16  | 0.14  | 0.17  | -0.01 |
| 35 | 1L2Y | 0.56 | 0.57 | 0.72 | 0.62 | 0.70  | 0.54  | -0.23 | -0.14 |
| 36 | 1LEB | 0.22 | 0.23 | 0.35 | 0.32 | 0.86  | 0.82  | -0.05 | -0.12 |
| 37 | 1LQ7 | 0.66 | 0.66 | 0.67 | 0.60 | 0.69  | 0.81  | 0.67  | 0.49  |
| 38 | 1MJC | 0.76 | 0.80 | 0.63 | 0.69 | 0.58  | 0.67  | 0.60  | 0.65  |
| 39 | 1NOA | 0.45 | 0.43 | 0.36 | 0.38 | 0.42  | 0.40  | 0.65  | 0.66  |
| 40 | 1OGQ | 0.08 | 0.06 | 0.20 | 0.17 | 0.62  | 0.59  | 0.45  | 0.50  |
| 41 | 1OIX | 0.25 | 0.25 | 0.49 | 0.49 | 0.21  | 0.32  | 0.51  | 0.54  |
| 42 | 1OPD | 0.55 | 0.52 | 0.57 | 0.62 | 0.35  | 0.40  | 0.43  | 0.40  |
| 43 | 1P68 | 0.61 | 0.51 | 0.58 | 0.56 | 0.69  | 0.56  | 0.47  | 0.34  |
| 44 | 1PGA | 0.21 | 0.18 | 0.16 | 0.13 | 0.31  | 0.14  | 0.30  | 0.20  |
| 45 | 1PHT | 0.79 | 0.77 | 0.83 | 0.70 | 0.72  | 0.67  | 0.82  | 0.78  |
| 46 | 1POU | 0.32 | 0.24 | 0.54 | 0.47 | 0.49  | 0.65  | -0.22 | -0.15 |
| 47 | 1PRV | 0.63 | 0.53 | 0.69 | 0.54 | 0.49  | 0.60  | 0.52  | 0.60  |
| 48 | 1PTF | 0.29 | 0.29 | 0.41 | 0.42 | 0.51  | 0.39  | 0.52  | 0.60  |
| 49 | 1QRE | 0.77 | 0.71 | 0.74 | 0.71 | 0.71  | 0.76  | 0.80  | 0.83  |
| 50 | 1RIJ | 0.46 | 0.48 | 0.74 | 0.78 | 0.71  | 0.68  | -0.28 | -0.19 |

|    |      |      |      |       |      |      |      |       |       |
|----|------|------|------|-------|------|------|------|-------|-------|
| 51 | 1ROP | 0.53 | 0.52 | 0.50  | 0.59 | 0.43 | 0.54 | 0.49  | 0.55  |
| 52 | 1RUW | 0.39 | 0.49 | 0.35  | 0.47 | 0.36 | 0.62 | 0.29  | 0.48  |
| 53 | 1STU | 0.46 | 0.48 | 0.40  | 0.48 | 0.55 | 0.88 | 0.38  | 0.17  |
| 54 | 1TEN | 0.48 | 0.48 | 0.44  | 0.46 | 0.56 | 0.61 | 0.29  | 0.35  |
| 55 | 1THX | 0.37 | 0.32 | 0.36  | 0.38 | 0.58 | 0.46 | 0.48  | 0.45  |
| 56 | 1TIG | 0.40 | 0.42 | 0.47  | 0.48 | 0.64 | 0.49 | 0.72  | 0.61  |
| 57 | 1TPN | 0.57 | 0.70 | 0.76  | 0.87 | 0.49 | 0.58 | 0.14  | 0.02  |
| 58 | 1UBQ | 0.49 | 0.49 | 0.47  | 0.40 | 0.52 | 0.50 | 0.65  | 0.67  |
| 59 | 1VIG | 0.79 | 0.66 | 0.27  | 0.33 | 0.85 | 0.86 | 0.53  | 0.48  |
| 60 | 1WIU | 0.70 | 0.48 | 0.77  | 0.66 | 0.67 | 0.47 | 0.59  | 0.45  |
| 61 | 1WKT | 0.66 | 0.47 | 0.80  | 0.59 | 0.72 | 0.55 | 0.48  | 0.37  |
| 62 | 1XCD | 0.71 | 0.64 | 0.74  | 0.70 | 0.58 | 0.49 | 0.31  | 0.41  |
| 63 | 1YRF | 0.58 | 0.69 | 0.35  | 0.60 | 0.58 | 0.62 | 0.32  | 0.45  |
| 64 | 2ACY | 0.33 | 0.27 | 0.27  | 0.29 | 0.26 | 0.33 | 0.44  | 0.47  |
| 65 | 2BBY | 0.55 | 0.62 | 0.75  | 0.82 | 0.51 | 0.76 | 0.38  | 0.48  |
| 66 | 2BF9 | 0.29 | 0.21 | -0.06 | 0.02 | 0.27 | 0.06 | 0.34  | 0.33  |
| 67 | 2CRB | 0.56 | 0.44 | 0.52  | 0.47 | 0.50 | 0.66 | 0.49  | 0.39  |
| 68 | 2E7N | 0.61 | 0.57 | 0.69  | 0.67 | 0.72 | 0.83 | 0.09  | 0.06  |
| 69 | 2FMR | 0.63 | 0.58 | 0.83  | 0.78 | 0.77 | 0.60 | 0.42  | 0.33  |
| 70 | 2HEP | 0.71 | 0.61 | 0.51  | 0.43 | 0.58 | 0.73 | 0.14  | 0.38  |
| 71 | 2HI3 | 0.63 | 0.45 | 0.34  | 0.19 | 0.64 | 0.75 | -0.14 | -0.14 |



|    |      |      |      |      |      |      |      |       |       |
|----|------|------|------|------|------|------|------|-------|-------|
| 72 | 2K9G | 0.78 | 0.80 | 0.61 | 0.61 | 0.71 | 0.52 | 0.39  | 0.31  |
| 73 | 2KYW | 0.75 | 0.63 | 0.78 | 0.69 | 0.72 | 0.67 | 0.19  | -0.02 |
| 74 | 2L09 | 0.43 | 0.36 | 0.29 | 0.20 | 0.44 | 0.68 | 0.00  | -0.18 |
| 75 | 2LGN | 0.72 | 0.53 | 0.56 | 0.57 | 0.77 | 0.61 | 0.37  | 0.36  |
| 76 | 2LVC | 0.79 | 0.73 | 0.85 | 0.77 | 0.71 | 0.49 | 0.36  | 0.16  |
| 77 | 2LZM | 0.37 | 0.46 | 0.23 | 0.33 | 0.46 | 0.49 | 0.49  | 0.55  |
| 78 | 2M6Q | 0.45 | 0.45 | 0.43 | 0.50 | 0.58 | 0.55 | 0.25  | 0.03  |
| 79 | 2MQ8 | 0.59 | 0.49 | 0.73 | 0.62 | 0.76 | 0.58 | 0.28  | 0.22  |
| 80 | 2N2U | 0.14 | 0.17 | 0.43 | 0.41 | 0.55 | 0.48 | 0.39  | 0.37  |
| 81 | 2PTL | 0.56 | 0.43 | 0.52 | 0.41 | 0.72 | 0.72 | 0.53  | 0.68  |
| 82 | 2RGF | 0.55 | 0.37 | 0.51 | 0.32 | 0.40 | 0.19 | 0.29  | 0.18  |
| 83 | 2YGS | 0.16 | 0.15 | 0.07 | 0.05 | 0.11 | 0.01 | 0.33  | 0.27  |
| 84 | 3CI2 | 0.32 | 0.23 | 0.52 | 0.40 | 0.65 | 0.62 | -0.16 | -0.24 |
| 85 | 3E8Y | 0.54 | 0.30 | 0.48 | 0.43 | 0.18 | 0.12 | 0.55  | 0.52  |
| 86 | 3ICB | 0.15 | 0.13 | 0.31 | 0.30 | 0.33 | 0.19 | 0.68  | 0.56  |
| 87 | 3KYW | 0.51 | 0.51 | 0.49 | 0.45 | 0.49 | 0.44 | 0.47  | 0.56  |
| 88 | 3KYY | 0.49 | 0.41 | 0.44 | 0.41 | 0.52 | 0.36 | 0.53  | 0.63  |
| 89 | 3NCM | 0.71 | 0.44 | 0.57 | 0.39 | 0.68 | 0.34 | 0.39  | 0.24  |
| 90 | 3PUC | 0.57 | 0.47 | 0.67 | 0.53 | 0.60 | 0.46 | 0.57  | 0.47  |
| 91 | 3WFW | 0.55 | 0.62 | 0.55 | 0.64 | 0.38 | 0.50 | 0.43  | 0.54  |
| 92 | 4F98 | 0.75 | 0.66 | 0.73 | 0.68 | 0.71 | 0.64 | 0.58  | 0.62  |

|          |      |      |      |      |      |      |      |      |      |
|----------|------|------|------|------|------|------|------|------|------|
| 93       | 4M9O | 0.64 | 0.60 | 0.55 | 0.51 | 0.52 | 0.43 | 0.64 | 0.55 |
| 94       | 4N6T | 0.41 | 0.34 | 0.53 | 0.52 | 0.84 | 0.73 | 0.76 | 0.79 |
| 95       | 4OZU | 0.49 | 0.48 | 0.31 | 0.36 | 0.44 | 0.48 | 0.61 | 0.63 |
| 96       | 4QRL | 0.69 | 0.61 | 0.47 | 0.46 | 0.81 | 0.81 | 0.79 | 0.78 |
| 97       | 4R7E | 0.46 | 0.47 | 0.44 | 0.46 | 0.59 | 0.55 | 0.37 | 0.34 |
| 98       | 4RTE | 0.49 | 0.52 | 0.38 | 0.30 | 0.74 | 0.81 | 0.71 | 0.74 |
| 99       | 5D14 | 0.56 | 0.56 | 0.46 | 0.44 | 0.35 | 0.40 | 0.52 | 0.53 |
| 100      | 6DNB | 0.46 | 0.34 | 0.58 | 0.41 | 0.51 | 0.37 | 0.58 | 0.36 |
| Average: |      | 0.48 | 0.44 | 0.44 | 0.48 | 0.53 | 0.51 | 0.38 | 0.35 |

**Table S3.** The Pearson ( $r_p$ ) and Spearman ( $r_s$ ) correlation coefficients of the RMSF profiles over the full structures calculated from B-factors (X-ray structures) or NMR ensembles (NMR structures) and those predicted with UNRES-flex, UNRES-DSSP-flex, CABS-flex, and NOLB, respectively.

| # | PDB ID | UNRES-flex |       | UNRES-DSSP-flex |       | CABS-flex |       | NOLB  |       |
|---|--------|------------|-------|-----------------|-------|-----------|-------|-------|-------|
|   |        | $r_s$      | $r_p$ | $r_s$           | $r_p$ | $r_s$     | $r_p$ | $r_s$ | $r_p$ |
| 1 | 1A6S   | 0.52       | 0.34  | 0.59            | 0.56  | 0.75      | 0.81  | 0.17  | -0.08 |
| 2 | 1A80   | 0.42       | 0.39  | 0.49            | 0.42  | 0.59      | 0.51  | 0.67  | 0.64  |
| 3 | 1ACP   | 0.38       | 0.59  | 0.55            | 0.67  | 0.36      | 0.30  | 0.25  | 0.18  |
| 4 | 1ADG   | 0.32       | 0.33  | 0.37            | 0.34  | 0.45      | 0.41  | 0.46  | 0.41  |
| 5 | 1AH9   | 0.77       | 0.84  | 0.79            | 0.82  | 0.83      | 0.79  | 0.19  | 0.31  |
| 6 | 1AKY   | 0.42       | 0.42  | 0.45            | 0.62  | 0.53      | 0.76  | 0.71  | 0.72  |
| 7 | 1ALA   | 0.47       | 0.43  | 0.58            | 0.54  | 0.52      | 0.49  | 0.55  | 0.48  |

|    |      |      |      |      |      |      |      |      |       |
|----|------|------|------|------|------|------|------|------|-------|
| 8  | 1AUM | 0.40 | 0.24 | 0.52 | 0.43 | 0.28 | 0.11 | 0.44 | 0.46  |
| 9  | 1BAL | 0.71 | 0.94 | 0.77 | 0.96 | 0.47 | 0.68 | 0.73 | 0.81  |
| 10 | 1BK2 | 0.42 | 0.39 | 0.21 | 0.20 | 0.39 | 0.21 | 0.52 | 0.60  |
| 11 | 1CFJ | 0.54 | 0.56 | 0.56 | 0.61 | 0.38 | 0.41 | 0.69 | 0.69  |
| 12 | 1CLB | 0.40 | 0.46 | 0.60 | 0.64 | 0.82 | 0.87 | 0.12 | -0.07 |
| 13 | 1CSP | 0.41 | 0.49 | 0.50 | 0.51 | 0.50 | 0.45 | 0.28 | 0.28  |
| 14 | 1CTF | 0.29 | 0.27 | 0.38 | 0.36 | 0.10 | 0.05 | 0.41 | 0.40  |
| 15 | 1EOG | 0.49 | 0.78 | 0.63 | 0.77 | 0.65 | 0.84 | 0.33 | 0.25  |
| 16 | 1ED7 | 0.49 | 0.45 | 0.59 | 0.53 | 0.33 | 0.22 | 0.00 | -0.02 |
| 17 | 1EM7 | 0.31 | 0.28 | 0.46 | 0.42 | 0.52 | 0.53 | 0.69 | 0.61  |
| 18 | 1ENH | 0.66 | 0.91 | 0.57 | 0.89 | 0.62 | 0.83 | 0.54 | 0.76  |
| 19 | 1EO0 | 0.40 | 0.59 | 0.43 | 0.66 | 0.36 | 0.31 | 0.38 | 0.39  |
| 20 | 1FEX | 0.62 | 0.88 | 0.73 | 0.88 | 0.64 | 0.79 | 0.07 | 0.57  |
| 21 | 1G6E | 0.60 | 0.49 | 0.70 | 0.57 | 0.47 | 0.44 | 0.49 | 0.40  |
| 22 | 1GAB | 0.52 | 0.88 | 0.54 | 0.92 | 0.64 | 0.95 | 0.71 | 0.84  |
| 23 | 1GHH | 0.30 | 0.52 | 0.42 | 0.67 | 0.24 | 0.57 | 0.10 | 0.16  |
| 24 | 1HNS | 0.72 | 0.82 | 0.81 | 0.93 | 0.86 | 0.84 | 0.41 | 0.62  |
| 25 | 1HRF | 0.55 | 0.87 | 0.55 | 0.87 | 0.69 | 0.79 | 0.39 | 0.05  |
| 26 | 1HYP | 0.74 | 0.72 | 0.65 | 0.68 | 0.71 | 0.63 | 0.61 | 0.54  |
| 27 | 1HYW | 0.71 | 0.76 | 0.70 | 0.82 | 0.73 | 0.81 | 0.19 | 0.46  |
| 28 | 1IG5 | 0.77 | 0.62 | 0.78 | 0.75 | 0.75 | 0.61 | 0.76 | 0.74  |

|    |      |      |      |      |      |       |      |       |       |
|----|------|------|------|------|------|-------|------|-------|-------|
| 29 | 1IQO | 0.43 | 0.41 | 0.57 | 0.50 | 0.63  | 0.53 | 0.21  | 0.29  |
| 30 | 1IYR | 0.47 | 0.79 | 0.68 | 0.91 | 0.79  | 0.91 | 0.53  | 0.22  |
| 31 | 1IYV | 0.55 | 0.80 | 0.55 | 0.80 | 0.65  | 0.86 | 0.24  | 0.07  |
| 32 | 1J7O | 0.33 | 0.79 | 0.25 | 0.83 | -0.15 | 0.52 | 0.37  | 0.67  |
| 33 | 1K4O | 0.79 | 0.82 | 0.82 | 0.85 | 0.68  | 0.59 | 0.57  | 0.55  |
| 34 | 1K8B | 0.37 | 0.41 | 0.49 | 0.65 | 0.20  | 0.37 | 0.19  | 0.08  |
| 35 | 1L2Y | 0.68 | 0.84 | 0.77 | 0.60 | 0.76  | 0.58 | -0.12 | -0.01 |
| 36 | 1LEB | 0.51 | 0.85 | 0.62 | 0.88 | 0.89  | 0.86 | 0.07  | 0.48  |
| 37 | 1LQ7 | 0.69 | 0.77 | 0.70 | 0.78 | 0.72  | 0.72 | 0.69  | 0.92  |
| 38 | 1MJC | 0.76 | 0.80 | 0.63 | 0.69 | 0.58  | 0.67 | 0.60  | 0.65  |
| 39 | 1NOA | 0.45 | 0.43 | 0.36 | 0.38 | 0.42  | 0.40 | 0.65  | 0.66  |
| 40 | 1OGQ | 0.08 | 0.06 | 0.19 | 0.16 | 0.63  | 0.62 | 0.46  | 0.56  |
| 41 | 1OIX | 0.25 | 0.25 | 0.49 | 0.49 | 0.21  | 0.32 | 0.51  | 0.54  |
| 42 | 1OPD | 0.60 | 0.60 | 0.62 | 0.70 | 0.35  | 0.32 | 0.45  | 0.33  |
| 43 | 1P68 | 0.65 | 0.67 | 0.63 | 0.72 | 0.72  | 0.64 | 0.48  | 0.42  |
| 44 | 1PGA | 0.21 | 0.18 | 0.16 | 0.13 | 0.31  | 0.14 | 0.30  | 0.20  |
| 45 | 1PHT | 0.79 | 0.77 | 0.83 | 0.70 | 0.72  | 0.67 | 0.82  | 0.78  |
| 46 | 1POU | 0.43 | 0.58 | 0.62 | 0.67 | 0.51  | 0.66 | -0.07 | 0.02  |
| 47 | 1PRV | 0.87 | 0.77 | 0.88 | 0.74 | 0.67  | 0.40 | -0.24 | -0.23 |
| 48 | 1PTF | 0.31 | 0.34 | 0.43 | 0.47 | 0.53  | 0.45 | 0.50  | 0.54  |
| 49 | 1QRE | 0.78 | 0.74 | 0.74 | 0.74 | 0.72  | 0.77 | 0.81  | 0.84  |

|    |      |      |      |      |      |      |      |       |      |
|----|------|------|------|------|------|------|------|-------|------|
| 50 | 1RIJ | 0.78 | 0.90 | 0.85 | 0.86 | 0.58 | 0.43 | -0.02 | 0.03 |
| 51 | 1ROP | 0.53 | 0.52 | 0.50 | 0.59 | 0.43 | 0.54 | 0.49  | 0.55 |
| 52 | 1RUW | 0.39 | 0.49 | 0.35 | 0.47 | 0.36 | 0.62 | 0.29  | 0.48 |
| 53 | 1STU | 0.48 | 0.49 | 0.44 | 0.49 | 0.58 | 0.88 | 0.40  | 0.18 |
| 54 | 1TEN | 0.48 | 0.48 | 0.44 | 0.46 | 0.56 | 0.61 | 0.29  | 0.35 |
| 55 | 1THX | 0.43 | 0.49 | 0.42 | 0.59 | 0.62 | 0.60 | 0.52  | 0.54 |
| 56 | 1TIG | 0.42 | 0.53 | 0.48 | 0.59 | 0.65 | 0.60 | 0.73  | 0.66 |
| 57 | 1TPN | 0.72 | 0.91 | 0.85 | 0.92 | 0.65 | 0.70 | 0.36  | 0.62 |
| 58 | 1UBQ | 0.58 | 0.77 | 0.53 | 0.64 | 0.59 | 0.75 | 0.71  | 0.85 |
| 59 | 1VIG | 0.82 | 0.88 | 0.38 | 0.82 | 0.87 | 0.88 | 0.58  | 0.78 |
| 60 | 1WIU | 0.70 | 0.48 | 0.77 | 0.66 | 0.67 | 0.47 | 0.59  | 0.45 |
| 61 | 1WKT | 0.69 | 0.63 | 0.82 | 0.75 | 0.73 | 0.54 | 0.50  | 0.52 |
| 62 | 1XCD | 0.71 | 0.64 | 0.74 | 0.70 | 0.58 | 0.49 | 0.31  | 0.41 |
| 63 | 1YRF | 0.61 | 0.78 | 0.40 | 0.73 | 0.62 | 0.77 | 0.35  | 0.41 |
| 64 | 2ACY | 0.42 | 0.67 | 0.38 | 0.78 | 0.35 | 0.63 | 0.52  | 0.60 |
| 65 | 2BBY | 0.67 | 0.72 | 0.82 | 0.77 | 0.56 | 0.54 | 0.45  | 0.60 |
| 66 | 2BF9 | 0.40 | 0.67 | 0.11 | 0.65 | 0.38 | 0.39 | 0.42  | 0.57 |
| 67 | 2CRB | 0.84 | 0.91 | 0.82 | 0.95 | 0.81 | 0.94 | 0.76  | 0.67 |
| 68 | 2E7N | 0.69 | 0.81 | 0.75 | 0.88 | 0.78 | 0.93 | 0.17  | 0.72 |
| 69 | 2FMR | 0.64 | 0.61 | 0.84 | 0.80 | 0.78 | 0.63 | 0.44  | 0.40 |
| 70 | 2HEP | 0.94 | 0.96 | 0.91 | 0.97 | 0.48 | 0.76 | 0.05  | 0.31 |

|    |      |      |      |      |      |      |      |       |      |
|----|------|------|------|------|------|------|------|-------|------|
| 71 | 2HI3 | 0.89 | 0.93 | 0.81 | 0.92 | 0.84 | 0.90 | 0.14  | 0.06 |
| 72 | 2K9G | 0.86 | 0.77 | 0.76 | 0.74 | 0.80 | 0.51 | 0.53  | 0.73 |
| 73 | 2KYW | 0.82 | 0.85 | 0.84 | 0.96 | 0.79 | 0.70 | 0.30  | 0.01 |
| 74 | 2L09 | 0.73 | 0.95 | 0.67 | 0.86 | 0.66 | 0.91 | 0.25  | 0.02 |
| 75 | 2LGN | 0.73 | 0.66 | 0.58 | 0.59 | 0.78 | 0.63 | 0.40  | 0.50 |
| 76 | 2LVC | 0.81 | 0.84 | 0.86 | 0.88 | 0.71 | 0.40 | 0.42  | 0.69 |
| 77 | 2LZM | 0.39 | 0.53 | 0.26 | 0.44 | 0.48 | 0.52 | 0.50  | 0.58 |
| 78 | 2M6Q | 0.58 | 0.86 | 0.57 | 0.80 | 0.66 | 0.68 | 0.34  | 0.10 |
| 79 | 2MQ8 | 0.73 | 0.98 | 0.83 | 0.99 | 0.84 | 0.96 | 0.37  | 0.20 |
| 80 | 2N2U | 0.51 | 0.96 | 0.65 | 0.98 | 0.67 | 0.90 | 0.41  | 0.03 |
| 81 | 2PTL | 0.80 | 0.95 | 0.78 | 0.94 | 0.85 | 0.85 | 0.74  | 0.81 |
| 82 | 2RGF | 0.55 | 0.37 | 0.51 | 0.32 | 0.40 | 0.19 | 0.29  | 0.18 |
| 83 | 2YGS | 0.18 | 0.21 | 0.10 | 0.18 | 0.14 | 0.12 | 0.35  | 0.30 |
| 84 | 3CI2 | 0.35 | 0.45 | 0.54 | 0.56 | 0.67 | 0.71 | -0.11 | 0.05 |
| 85 | 3E8Y | 0.58 | 0.59 | 0.53 | 0.70 | 0.26 | 0.38 | 0.59  | 0.70 |
| 86 | 3ICB | 0.18 | 0.18 | 0.34 | 0.38 | 0.35 | 0.25 | 0.69  | 0.61 |
| 87 | 3KYW | 0.51 | 0.51 | 0.49 | 0.45 | 0.49 | 0.44 | 0.47  | 0.56 |
| 88 | 3KYY | 0.49 | 0.41 | 0.44 | 0.41 | 0.52 | 0.36 | 0.53  | 0.63 |
| 89 | 3NCM | 0.71 | 0.44 | 0.57 | 0.39 | 0.68 | 0.34 | 0.39  | 0.24 |
| 90 | 3PUC | 0.58 | 0.46 | 0.68 | 0.52 | 0.61 | 0.46 | 0.58  | 0.50 |
| 91 | 3WFW | 0.59 | 0.61 | 0.59 | 0.70 | 0.35 | 0.39 | 0.44  | 0.45 |

|          |      |      |      |      |      |      |      |      |      |
|----------|------|------|------|------|------|------|------|------|------|
| 92       | 4F98 | 0.77 | 0.67 | 0.76 | 0.73 | 0.73 | 0.76 | 0.61 | 0.63 |
| 93       | 4M9O | 0.66 | 0.67 | 0.58 | 0.59 | 0.55 | 0.47 | 0.66 | 0.60 |
| 94       | 4N6T | 0.41 | 0.34 | 0.53 | 0.52 | 0.84 | 0.73 | 0.76 | 0.79 |
| 95       | 4OZU | 0.50 | 0.49 | 0.32 | 0.38 | 0.45 | 0.51 | 0.61 | 0.62 |
| 96       | 4QRL | 0.69 | 0.61 | 0.47 | 0.46 | 0.81 | 0.81 | 0.79 | 0.78 |
| 97       | 4R7E | 0.46 | 0.47 | 0.44 | 0.46 | 0.59 | 0.55 | 0.37 | 0.34 |
| 98       | 4RTE | 0.51 | 0.56 | 0.39 | 0.38 | 0.74 | 0.82 | 0.71 | 0.73 |
| 99       | 5D14 | 0.60 | 0.78 | 0.51 | 0.70 | 0.38 | 0.45 | 0.56 | 0.59 |
| 100      | 6DNB | 0.47 | 0.41 | 0.59 | 0.47 | 0.52 | 0.42 | 0.59 | 0.41 |
| Average: |      | 0.56 | 0.62 | 0.58 | 0.65 | 0.58 | 0.59 | 0.43 | 0.45 |

**Table S4.** The average Pearson's ( $r_p$ ) and Spearman's correlation coefficients ( $r_s$ ) between fluctuation profiles calculated for truncated structures with UNRES-flex, UNRES-DSSP-flex, CABS-flex, and NOLB.

A: NMR structures

|                        | Secondary-structure type |       |         |       |                  |       |       |       |
|------------------------|--------------------------|-------|---------|-------|------------------|-------|-------|-------|
|                        | $\alpha$                 |       | $\beta$ |       | $\alpha + \beta$ |       | all   |       |
|                        | $r_p$                    | $r_s$ | $r_p$   | $r_s$ | $r_p$            | $r_s$ | $r_p$ | $r_s$ |
| <b>UNRES-flex</b>      | 0.410                    | 0.449 | 0.522   | 0.586 | 0.427            | 0.474 | 0.441 | 0.489 |
|                        | 0.153                    | 0.172 | 0.236   | 0.264 | 0.138            | 0.163 | 0.176 | 0.200 |
| <b>UNRES-DSSP-flex</b> | 0.466                    | 0.516 | 0.574   | 0.613 | 0.488            | 0.525 | 0.498 | 0.541 |
|                        | 0.181                    | 0.174 | 0.248   | 0.275 | 0.154            | 0.151 | 0.194 | 0.197 |
| <b>CABS-flex</b>       | 0.524                    | 0.498 | 0.536   | 0.618 | 0.608            | 0.614 | 0.558 | 0.568 |
|                        | 0.300                    | 0.279 | 0.129   | 0.173 | 0.191            | 0.163 | 0.235 | 0.226 |
| <b>NOLB</b>            | 0.128                    | 0.185 | 0.238   | 0.300 | 0.166            | 0.247 | 0.167 | 0.234 |
|                        | 0.249                    | 0.277 | 0.172   | 0.171 | 0.237            | 0.202 | 0.233 | 0.234 |

## B: X-ray structures

|                        | Secondary-structure type |       |       |       |                  |       |       |       |
|------------------------|--------------------------|-------|-------|-------|------------------|-------|-------|-------|
|                        | $\alpha$                 |       | B     |       | $\alpha + \beta$ |       | all   |       |
|                        | $r_p$                    | $r_s$ | $r_p$ | $r_s$ | $r_p$            | $r_s$ | $r_p$ | $r_s$ |
| <b>UNRES-flex</b>      | 0.465                    | 0.501 | 0.527 | 0.553 | 0.396            | 0.417 | 0.447 | 0.474 |
|                        | 0.195                    | 0.169 | 0.149 | 0.145 | 0.159            | 0.168 | 0.178 | 0.173 |
| <b>UNRES-DSSP-flex</b> | 0.473                    | 0.467 | 0.496 | 0.512 | 0.426            | 0.431 | 0.457 | 0.460 |
|                        | 0.198                    | 0.202 | 0.181 | 0.182 | 0.148            | 0.157 | 0.176 | 0.182 |
| <b>CABS-flex</b>       | 0.392                    | 0.439 | 0.497 | 0.519 | 0.499            | 0.524 | 0.460 | 0.492 |
|                        | 0.209                    | 0.165 | 0.131 | 0.104 | 0.189            | 0.190 | 0.194 | 0.171 |
| <b>NOLB</b>            | 0.512                    | 0.512 | 0.502 | 0.468 | 0.573            | 0.578 | 0.537 | 0.532 |
|                        | 0.130                    | 0.129 | 0.120 | 0.150 | 0.158            | 0.150 | 0.145 | 0.149 |

## C: All structures

|                        | Secondary-structure type |       |       |       |                  |       |       |       |
|------------------------|--------------------------|-------|-------|-------|------------------|-------|-------|-------|
|                        | $\alpha$                 |       | B     |       | $\alpha + \beta$ |       | all   |       |
|                        | $r_p$                    | $r_s$ | $r_p$ | $r_s$ | $r_p$            | $r_s$ | $r_p$ | $r_s$ |
| <b>UNRES-flex</b>      | 0.436                    | 0.474 | 0.525 | 0.570 | 0.410            | 0.444 | 0.444 | 0.482 |
|                        | 0.176                    | 0.173 | 0.200 | 0.216 | 0.150            | 0.169 | 0.177 | 0.187 |
| <b>UNRES-DSSP-flex</b> | 0.469                    | 0.493 | 0.537 | 0.565 | 0.455            | 0.474 | 0.477 | 0.500 |
|                        | 0.189                    | 0.190 | 0.222 | 0.241 | 0.154            | 0.161 | 0.186 | 0.194 |
| <b>CABS-flex</b>       | 0.461                    | 0.470 | 0.517 | 0.571 | 0.550            | 0.566 | 0.509 | 0.530 |
|                        | 0.269                    | 0.234 | 0.131 | 0.153 | 0.198            | 0.183 | 0.221 | 0.204 |
| <b>NOLB</b>            | 0.310                    | 0.340 | 0.364 | 0.380 | 0.384            | 0.425 | 0.352 | 0.383 |
|                        | 0.278                    | 0.273 | 0.199 | 0.182 | 0.284            | 0.242 | 0.268 | 0.246 |

**Table S5.** The average Pearson's ( $r_p$ ) and Spearman's correlation coefficients ( $r_s$ ) between fluctuation profiles calculated for full structures with UNRES-flex, UNRES-DSSP-flex, CABS-flex, and NOLB.

## A: NMR structures



| Secondary-structure type |          |       |         |       |                  |       |       |       |
|--------------------------|----------|-------|---------|-------|------------------|-------|-------|-------|
|                          | $\alpha$ |       | $\beta$ |       | $\alpha + \beta$ |       | all   |       |
|                          | $r_p$    | $r_s$ | $r_p$   | $r_s$ | $r_p$            | $r_s$ | $r_p$ | $r_s$ |
| <b>UNRES-flex</b>        | 0.759    | 0.625 | 0.735   | 0.698 | 0.681            | 0.580 | 0.724 | 0.624 |
|                          | 0.171    | 0.184 | 0.152   | 0.116 | 0.212            | 0.148 | 0.188 | 0.164 |
| <b>UNRES-DSSP-flex</b>   | 0.803    | 0.680 | 0.774   | 0.723 | 0.715            | 0.623 | 0.763 | 0.668 |
|                          | 0.130    | 0.163 | 0.131   | 0.122 | 0.192            | 0.131 | 0.161 | 0.148 |
| <b>CABS-flex</b>         | 0.672    | 0.590 | 0.600   | 0.695 | 0.706            | 0.666 | 0.669 | 0.642 |
|                          | 0.217    | 0.245 | 0.183   | 0.129 | 0.213            | 0.164 | 0.212 | 0.200 |
| <b>NOLB</b>              | 0.361    | 0.282 | 0.358   | 0.356 | 0.292            | 0.318 | 0.334 | 0.312 |
|                          | 0.340    | 0.293 | 0.272   | 0.159 | 0.242            | 0.192 | 0.293 | 0.234 |

B: X-ray structures

| Secondary-structure type |          |       |         |       |                  |       |       |       |
|--------------------------|----------|-------|---------|-------|------------------|-------|-------|-------|
|                          | $\alpha$ |       | $\beta$ |       | $\alpha + \beta$ |       | all   |       |
|                          | $r_p$    | $r_s$ | $r_p$   | $r_s$ | $r_p$            | $r_s$ | $r_p$ | $r_s$ |
| <b>UNRES-flex</b>        | 0.560    | 0.529 | 0.552   | 0.563 | 0.453            | 0.434 | 0.512 | 0.494 |
|                          | 0.210    | 0.166 | 0.126   | 0.142 | 0.182            | 0.170 | 0.190 | 0.172 |
| <b>UNRES-DSSP-flex</b>   | 0.594    | 0.503 | 0.524   | 0.525 | 0.492            | 0.449 | 0.535 | 0.484 |
|                          | 0.175    | 0.178 | 0.154   | 0.173 | 0.167            | 0.154 | 0.174 | 0.170 |
| <b>CABS-flex</b>         | 0.464    | 0.464 | 0.513   | 0.528 | 0.541            | 0.537 | 0.508 | 0.509 |
|                          | 0.196    | 0.160 | 0.149   | 0.106 | 0.197            | 0.186 | 0.191 | 0.167 |
| <b>NOLB</b>              | 0.562    | 0.537 | 0.518   | 0.478 | 0.589            | 0.590 | 0.565 | 0.548 |
|                          | 0.131    | 0.116 | 0.126   | 0.156 | 0.165            | 0.147 | 0.149 | 0.145 |

C: All structures

| Secondary-structure type |          |       |         |       |                  |       |       |       |
|--------------------------|----------|-------|---------|-------|------------------|-------|-------|-------|
|                          | $\alpha$ |       | $\beta$ |       | $\alpha + \beta$ |       | all   |       |
|                          | $r_p$    | $r_s$ | $r_p$   | $r_s$ | $r_p$            | $r_s$ | $r_p$ | $r_s$ |

|                        |       |       |       |       |       |       |       |       |
|------------------------|-------|-------|-------|-------|-------|-------|-------|-------|
| <b>UNRES-flex</b>      | 0.665 | 0.580 | 0.648 | 0.634 | 0.559 | 0.502 | 0.618 | 0.559 |
|                        | 0.215 | 0.182 | 0.167 | 0.146 | 0.227 | 0.176 | 0.217 | 0.180 |
| <b>UNRES-DSSP-flex</b> | 0.704 | 0.596 | 0.655 | 0.628 | 0.595 | 0.530 | 0.649 | 0.576 |
|                        | 0.185 | 0.192 | 0.190 | 0.178 | 0.211 | 0.168 | 0.203 | 0.184 |
| <b>3CABS-flex</b>      | 0.574 | 0.530 | 0.559 | 0.615 | 0.617 | 0.597 | 0.588 | 0.575 |
|                        | 0.232 | 0.218 | 0.173 | 0.145 | 0.220 | 0.188 | 0.217 | 0.196 |
| <b>NOLB</b>            | 0.456 | 0.403 | 0.434 | 0.415 | 0.451 | 0.464 | 0.449 | 0.430 |
|                        | 0.281 | 0.260 | 0.230 | 0.169 | 0.252 | 0.217 | 0.259 | 0.228 |

**Table S6.** ANOVA results, shown as significance levels (expressed as p-values), of the Pearson's ( $r_p$ ) and Spearman's ( $r_s$ ) correlation coefficients between the fluctuation profiles calculated with UNRES-flex, UNRES-DSSP-flex, CABS-flex, and NOLB and the corresponding experimental profiles. The analysis has been carried out for truncated structures. The values in the 'Method' and 'Secondary structure' columns indicate the significance of the dependence of a correlation coefficient on fluctuation-profile-prediction method and on secondary-structure type ( $\alpha$ ,  $\beta$ , or  $\alpha+\beta$ , respectively). The values in the 'Interaction column' indicate the significance of the simultaneous dependence of a correlation coefficient on the prediction method and secondary-structure type. The p-values lower than 0.05 (indicating statistical significance) are in red font and higher values (corresponding to weak or no statistical significance) are in green font.

| Significance level      | $r_p/r_s$             | Method | Secondary structure | Interaction |
|-------------------------|-----------------------|--------|---------------------|-------------|
|                         | <b>NMR structures</b> |        |                     |             |
| $r_p$                   |                       | <0.001 | 0.082               | 0.82        |
| $r_s$                   |                       | <0.001 | 0.016               | 0.94        |
| <b>X-ray structures</b> |                       |        |                     |             |
| $r_p$                   |                       | 0.040  | 0.42                | 0.14        |
| $r_s$                   |                       | 0.17   | 0.60                | 0.069       |
| <b>All structures</b>   |                       |        |                     |             |
| $r_p$                   |                       | <0.001 | 0.074               | 0.37        |
| $r_s$                   |                       | <0.001 | 0.024               | 0.19        |

**Table S7.** Significance of differences, expressed as p-values, of the Pearson's ( $r_p$ ) and Spearman's ( $r_s$ ) correlation coefficients of fluctuation profiles, corresponding to truncated structures, calculated with UNRES-flex, UNRES-DSSP-flex, CABS-flex, and NOLB assessed by the two sample t-test depending on structure-determination method and secondary-structure class. The p-values with the "-" sign indicate that the respective correlation coefficients are greater for the method in the left column (Method 1), while the "+" sign means that the correlation coefficients are greater for the method in the right column (Method

2). The p-values lower than 0.05 (indicating statistical significance) are in red font and higher values (corresponding to weak or no statistical significance) are in green font.

A: NMR structures, Pearson coefficient ( $r_p$ )

| Significance level | Method 1        | Method 2        | Secondary-structure type |          |                  |          |
|--------------------|-----------------|-----------------|--------------------------|----------|------------------|----------|
|                    |                 |                 | $\alpha$                 | $\beta$  | $\alpha + \beta$ | all      |
| UNRES-flex         | UNRES-DSSP-flex | UNRES-DSSP-flex | + 0.31                   | + 0.64   | + 0.22           | + 0.42   |
|                    |                 | CABS-flex       | + 0.15                   | + 0.88   | + 0.0024         | + 0.35   |
|                    |                 | NOLB            | - <0.001                 | - 0.0060 | - <0.001         | - <0.001 |
| UNRES-DSSP-flex    | UNRES-DSSP-flex | CABS-flex       | + 0.47                   | - 0.67   | + 0.046          | + 0.36   |
|                    |                 | NOLB            | - <0.001                 | - 0.0022 | - <0.001         | - <0.001 |
| CABS-flex          | CABS-flex       | NOLB            | - <0.001                 | - <0.001 | - <0.001         | - <0.001 |

B: NMR structures, Spearman coefficient ( $r_s$ )

| Significance level | Method 1        | Method 2        | Secondary-structure type |          |                  |          |
|--------------------|-----------------|-----------------|--------------------------|----------|------------------|----------|
|                    |                 |                 | $\alpha$                 | $\beta$  | $\alpha + \beta$ | all      |
| UNRES-flex         | UNRES-DSSP-flex | UNRES-DSSP-flex | + 0.31                   | + 0.64   | + 0.22           | + 0.42   |
|                    |                 | CABS-flex       | + 0.15                   | + 0.88   | + 0.0024         | + 0.35   |
|                    |                 | NOLB            | - <0.001                 | - 0.0060 | - <0.001         | - <0.001 |
| UNRES-DSSP-flex    | UNRES-DSSP-flex | CABS-flex       | + 0.47                   | - 0.67   | + 0.046          | + 0.36   |
|                    |                 | NOLB            | - <0.001                 | - 0.0022 | - <0.001         | - <0.001 |
| CABS-flex          | CABS-flex       | NOLB            | - <0.001                 | - <0.001 | - <0.001         | - <0.001 |

C: X-ray structures, Pearson coefficient ( $r_p$ )

| Significance level | Method 1 | Method 2 | Secondary-structure type |         |                  |     |
|--------------------|----------|----------|--------------------------|---------|------------------|-----|
|                    |          |          | $\alpha$                 | $\beta$ | $\alpha + \beta$ | all |

|  |                 |                 |         |        |          |          |
|--|-----------------|-----------------|---------|--------|----------|----------|
|  | UNRES-flex      | UNRES-DSSP-flex | + 0.91  | - 0.70 | + 0.52   | + 0.65   |
|  |                 | CABS-flex       | - 0.30  | - 0.66 | + 0.061  | + 0.24   |
|  |                 | NOLB            | + 0.41  | - 0.70 | + <0.001 | + 0.0073 |
|  | UNRES-DSSP-flex | CABS-flex       | - 0.25  | - 0.99 | + 0.17   | + 0.35   |
|  |                 | NOLB            | + 0.50  | - 0.94 | + 0.0035 | + 0.31   |
|  | CABS-flex       | NOLB            | + 0.052 | + 0.94 | + 0.18   | + 0.30   |

D: X-ray structures, Spearman coefficient ( $r_s$ )

| Significance level | Method 1        | Method 2        | Secondary-structure type |        |                  |        |
|--------------------|-----------------|-----------------|--------------------------|--------|------------------|--------|
|                    |                 |                 | $\alpha$                 | B      | $\alpha + \beta$ | all    |
| UNRES-flex         | UNRES-DSSP-flex | UNRES-DSSP-flex | - 0.60                   | - 0.61 | + 0.78           | - 0.70 |
|                    |                 | CABS-flex       | - 0.28                   | - 0.58 | + 0.061          | + 0.22 |
|                    |                 | NOLB            | + 0.84                   | - 0.24 | + 0.0021         | + 0.25 |
| UNRES-DSSP-flex    | UNRES-DSSP-flex | CABS-flex       | - 0.66                   | + 0.92 | + 0.092          | + 0.39 |
|                    |                 | NOLB            | + 0.45                   | - 0.58 | + 0.0033         | + 0.26 |
| CABS-flex          | CABS-flex       | NOLB            | + 0.16                   | - 0.41 | + 0.30           | + 0.29 |

E: All structures, Pearson coefficient ( $r_p$ )

| Significance level | Method 1        | Method 2        | Secondary-structure type |          |                  |          |
|--------------------|-----------------|-----------------|--------------------------|----------|------------------|----------|
|                    |                 |                 | $\alpha$                 | $\beta$  | $\alpha + \beta$ | all      |
| UNRES-flex         | UNRES-DSSP-flex | UNRES-DSSP-flex | + 0.44                   | + 0.86   | + 0.19           | + 0.41   |
|                    |                 | CABS-flex       | +0.63                    | - 0.90   | + <0.001         | + 0.38   |
|                    |                 | NOLB            | - 0.023                  | - 0.015  | - 0.61           | - 0.31   |
| UNRES-DSSP-flex    | UNRES-DSSP-flex | CABS-flex       | - 0.89                   | - 0.74   | + 0.019          | + 0.43   |
|                    |                 | NOLB            | - 0.0053                 | - 0.013  | - 0.17           | - 0.10   |
| CABS-flex          | CABS-flex       | NOLB            | - 0.020                  | - 0.0063 | - 0.0034         | - 0.0090 |

F: All structures, Spearman coefficient ( $r_s$ )

| can ce | Method 1 | Method 2 | Secondary-structure type |         |                  |     |
|--------|----------|----------|--------------------------|---------|------------------|-----|
|        |          |          | $\alpha$                 | $\beta$ | $\alpha + \beta$ | all |

|  |                 |                 |          |          |          |          |
|--|-----------------|-----------------|----------|----------|----------|----------|
|  | UNRES-flex      | UNRES-DSSP-flex | + 0.66   | - 0.94   | + 0.40   | + 0.59   |
|  |                 | CABS-flex       | - 0.94   | - 1.0    | + 0.0027 | + 0.49   |
|  |                 | NOLB            | - 0.014  | - 0.0045 | - 0.69   | - 0.34   |
|  | UNRES-DSSP-flex | CABS-flex       | - 0.65   | + 0.93   | + 0.021  | + 0.40   |
|  |                 | NOLB            | - 0.0067 | - 0.0091 | - 0.28   | - 0.14   |
|  |                 | CABS-flex       | NOLB     | - 0.031  | - <0.001 | - 0.0043 |

**Table S8.** PDB codes of NMR structures with low similarity of the fluctuation profiles estimated from NMR ensembles and those calculated with a given method.

| method          | structure with $r_p \leq 0.2$                                                                                                                                                            |
|-----------------|------------------------------------------------------------------------------------------------------------------------------------------------------------------------------------------|
| UNRES-flex      | 1ACP, 1BAL, 1GAB, 1HRF, 1J7O, 1LEB, 1POU, 2N2U, 3CI2                                                                                                                                     |
| UNRES-DSSP-flex | 1BAL, 1GAB, 1HRF, 1J7O, 2HI3, 2L09                                                                                                                                                       |
| CABS-flex       | 1BAL, 1ED7, 1J7O, 1K8B, 2RGF                                                                                                                                                             |
| NOLB            | 1A6S, 1ACP, 1AH9, 1BAL, 1CLB, 1E0G, 1ED7, 1FEX, 1GHH, 1HNS, 1HYW, 1IQO, 1IYR, 1J7O, 1K8B, 1L2Y, 1LEB, 1POU, 1RIJ, 1STU, 1TPN, 2E7N, 2HI3, 2KYW, 2L09, 2LVC, 2M6Q, 2MQ8, 2RGF, 3CI2, 3NCM |

**Figure S1.** Normalized fluctuation profiles (RMSFN, dimensionless) calculated from NMR ensembles or X-ray B-factors (red line) and the corresponding profile predicted by UNRES-flex (light-blue line), UNRES-DSSP-flex (green line), CABS-flex (yellow line), and NOLB (blue line). Except for NOLB, the fluctuation profiles are averaged over three simulations. The Pearson ( $r_p$ ) and Spearman ( $r_s$ ) coefficients for the correlation between the experimental and predicted profiles are shown in each panel. The solid orange and wavy green lines below the abscissa of each panel indicate the  $\beta$ -sheet and  $\alpha$ -helical structure, respectively. The analyses were carried out for truncated structures.

1A6S truncated RMSFN profiles

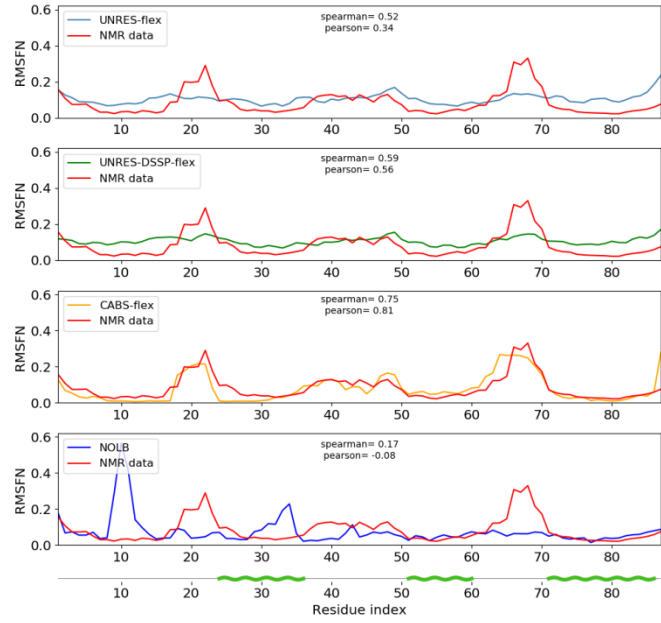

1A80 truncated RMSFN profiles

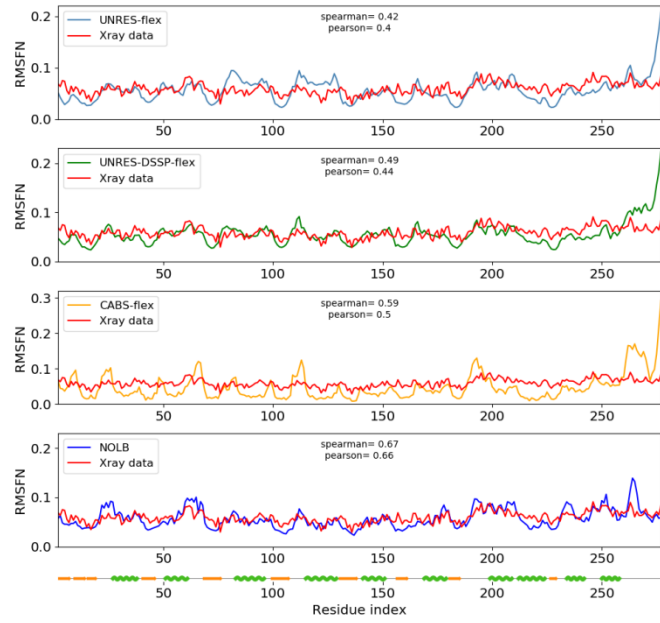

1ACP truncated RMSFN profiles

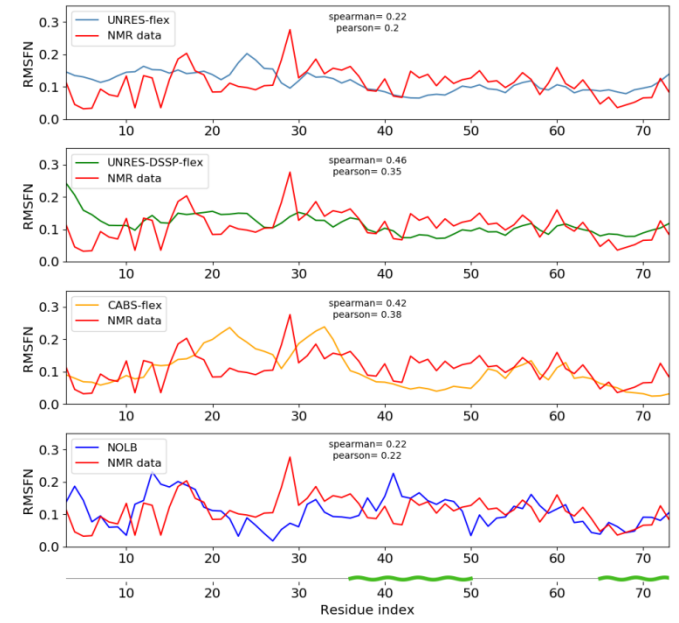

1ADG truncated RMSFN profiles

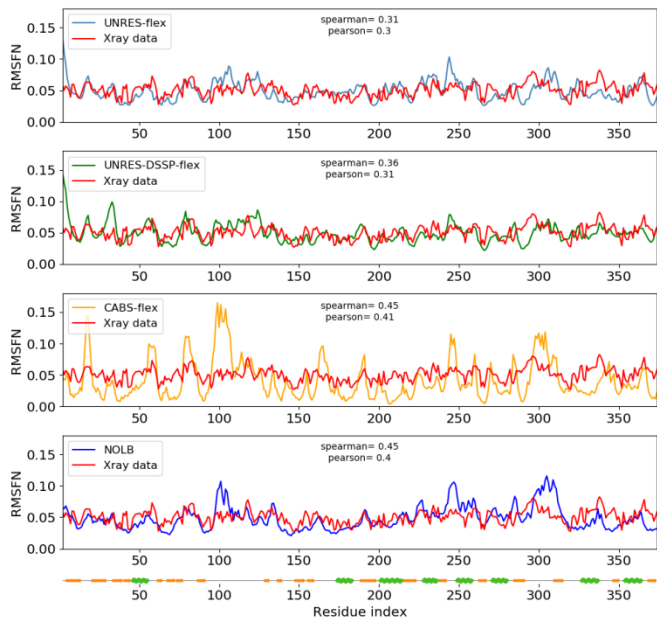

1AH9 truncated RMSFN profiles

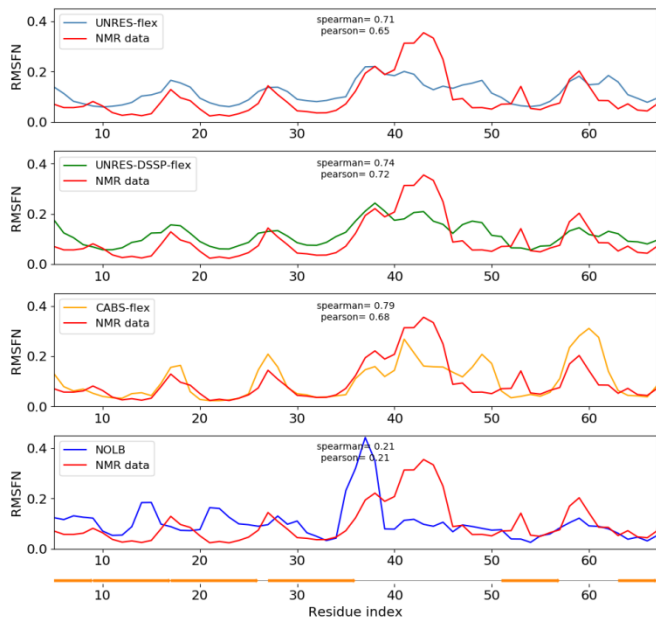

1AKY truncated RMSFN profiles

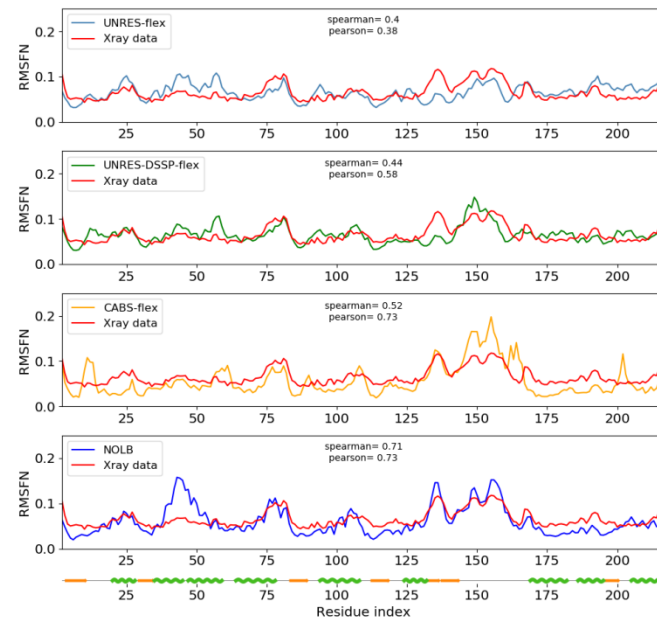

1ALA truncated RMSFN profiles

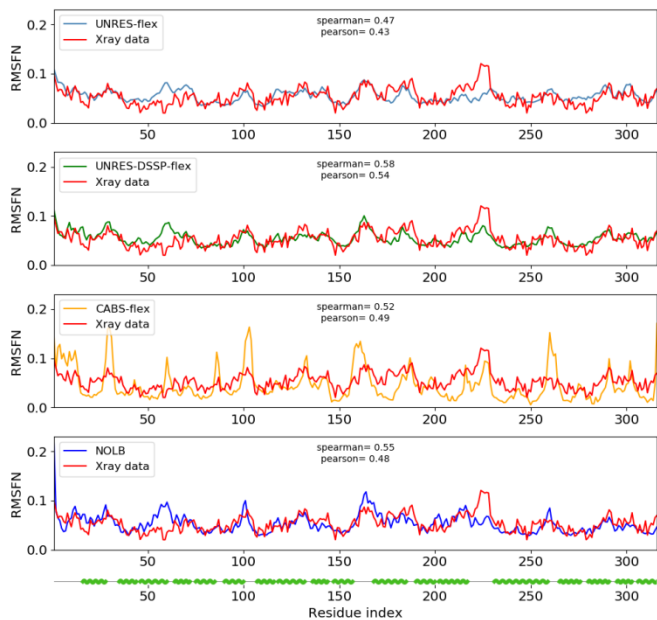

1AUM truncated RMSFN profiles

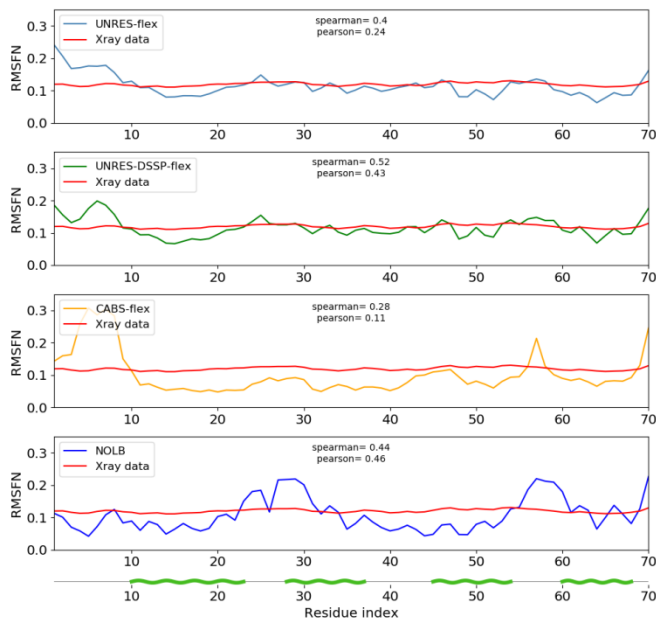

1BAL truncated RMSFN profiles

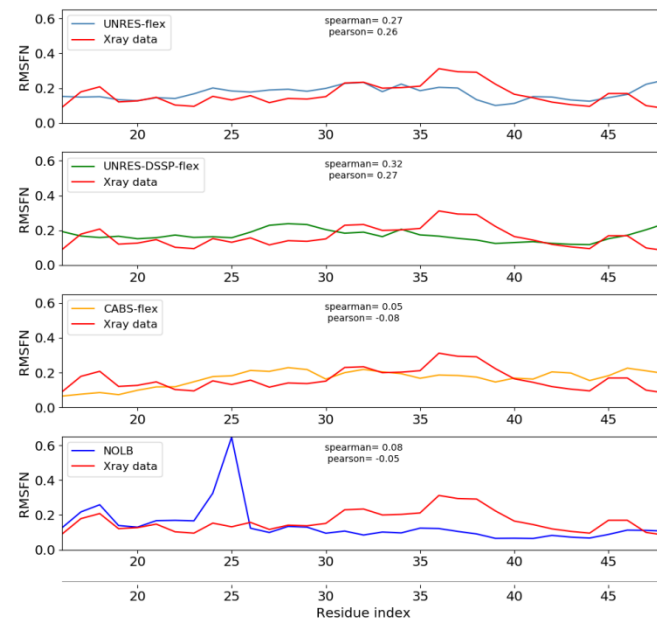

1BK2 truncated RMSFN profiles

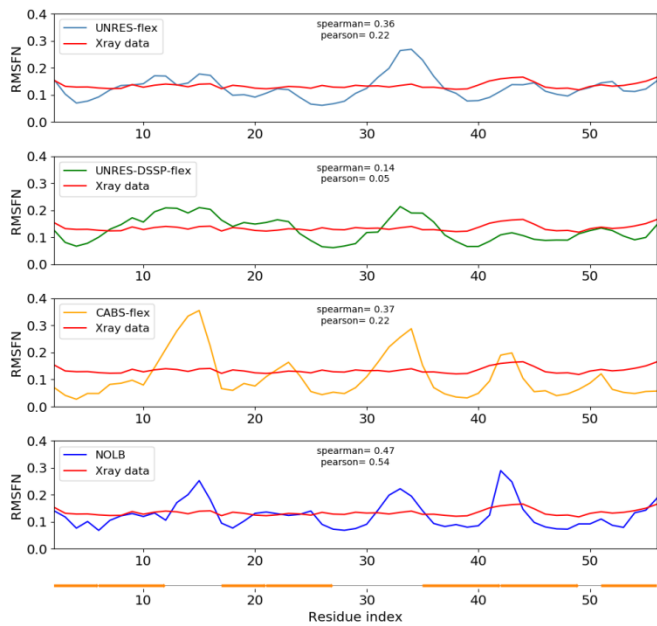

1CFJ truncated RMSFN profiles

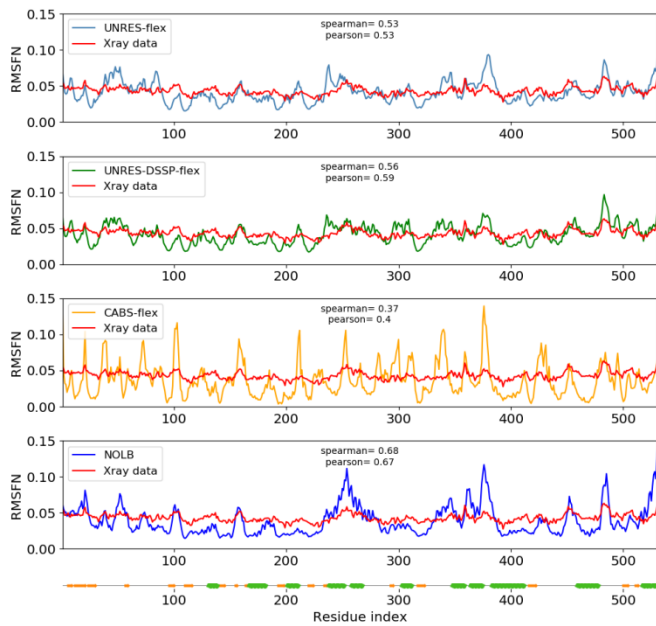

1CLB truncated RMSFN profiles

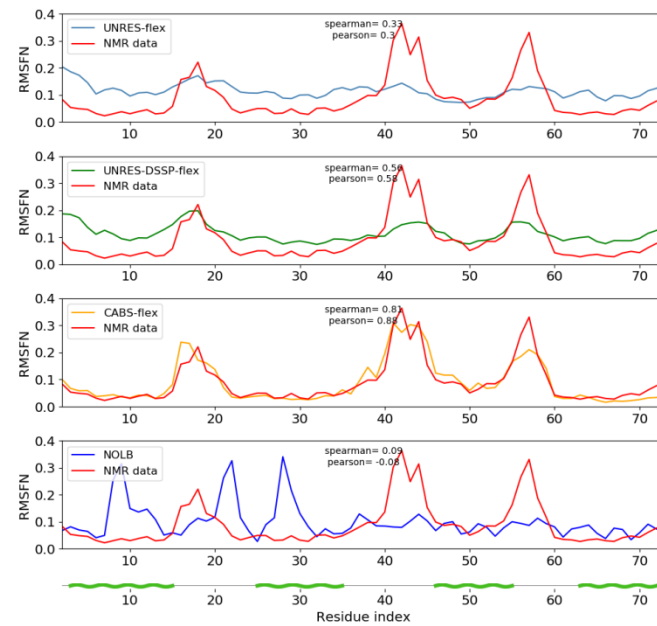

1CSP truncated RMSFN profiles

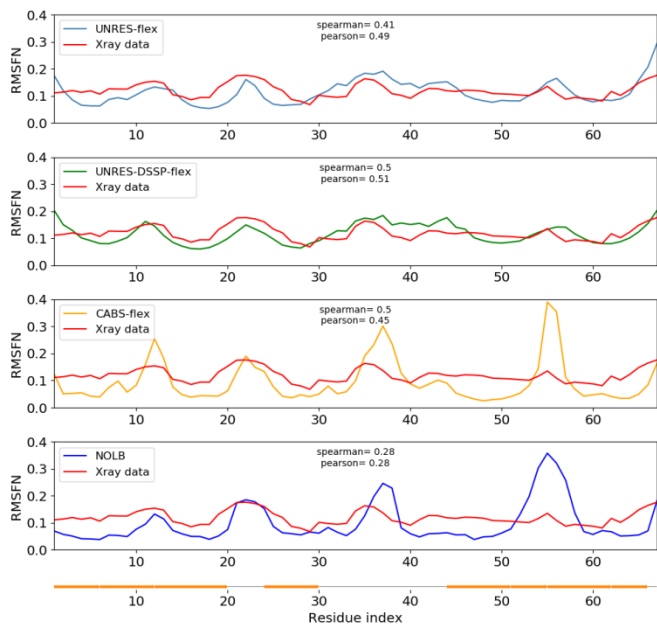

1CTF truncated RMSFN profiles

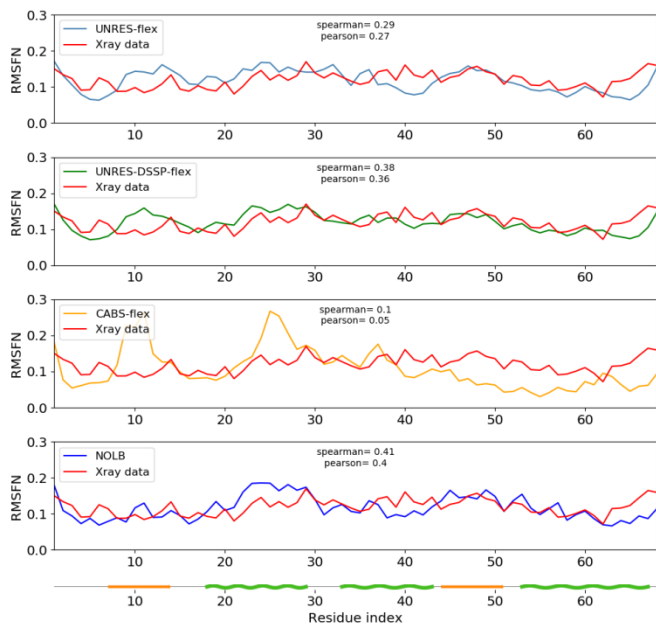

1EOG truncated RMSFN profiles

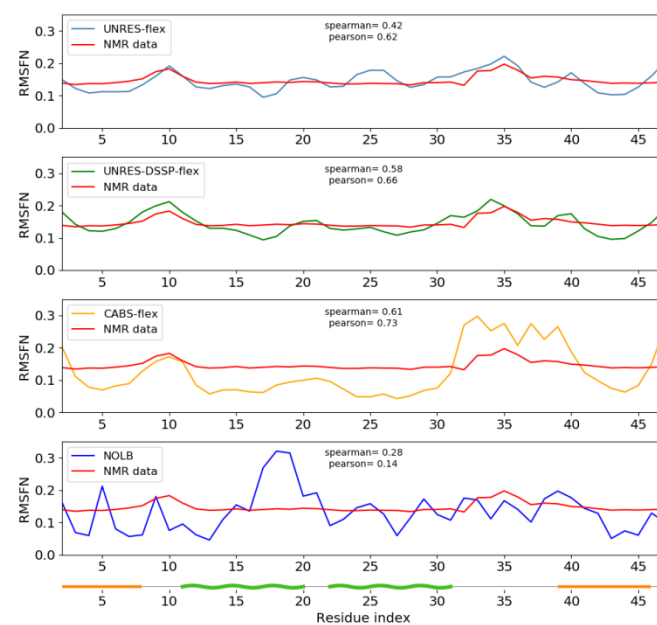



1ED7 truncated RMSFN profiles

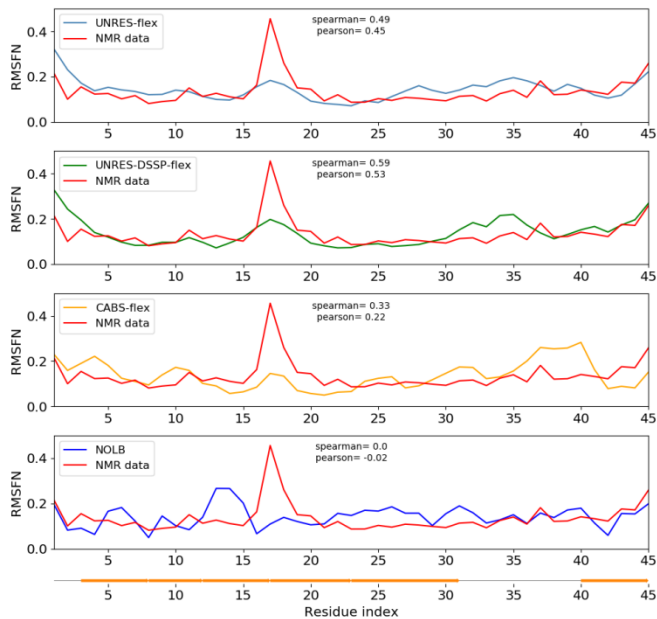

1EM7 truncated RMSFN profiles

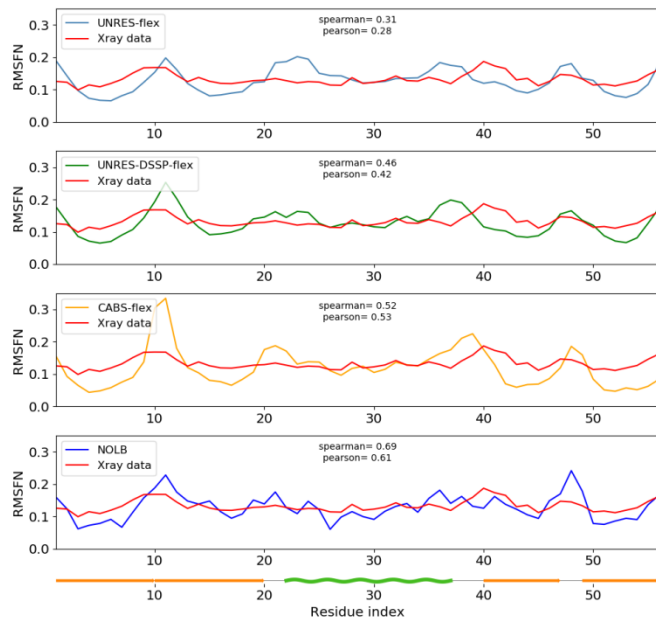

1ENH truncated RMSFN profiles

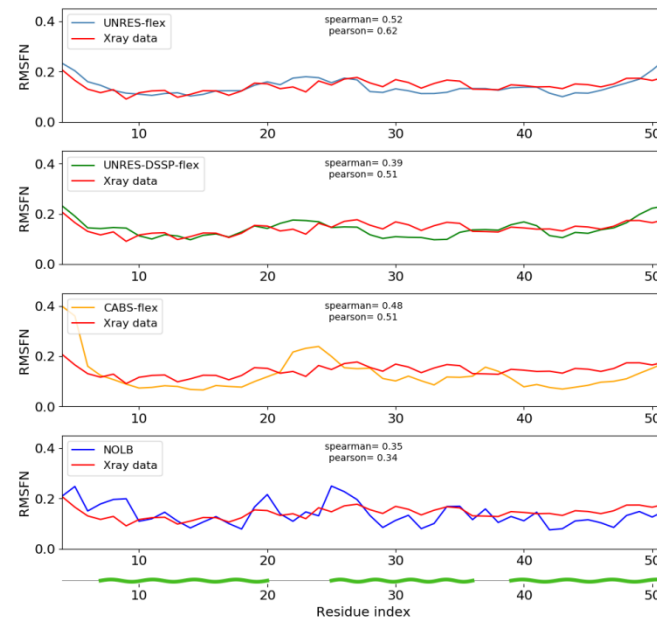

1EO0 truncated RMSFN profiles

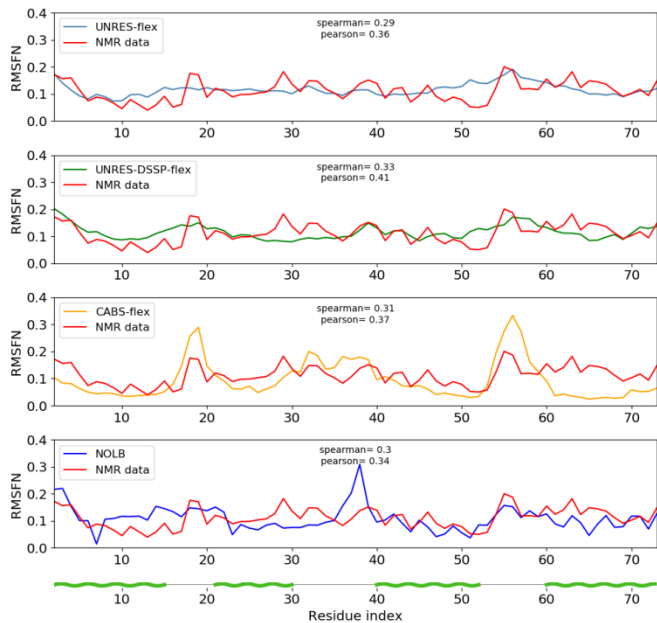

1FEX truncated RMSFN profiles

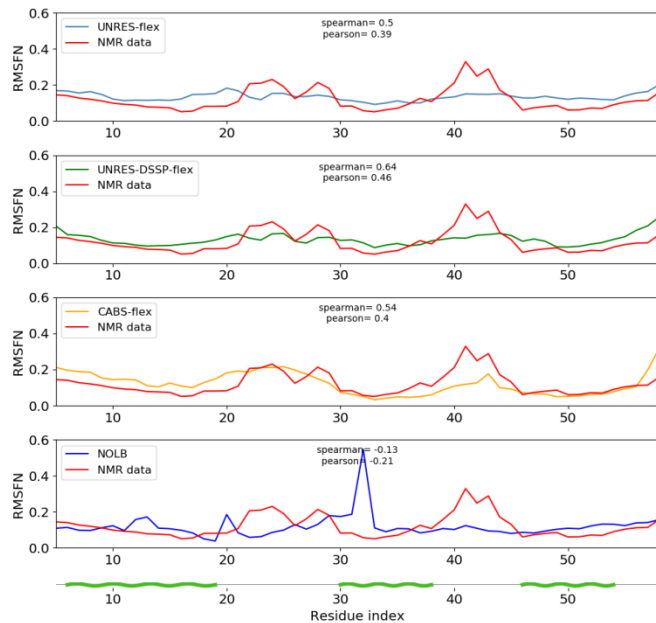

1G6E truncated RMSFN profiles

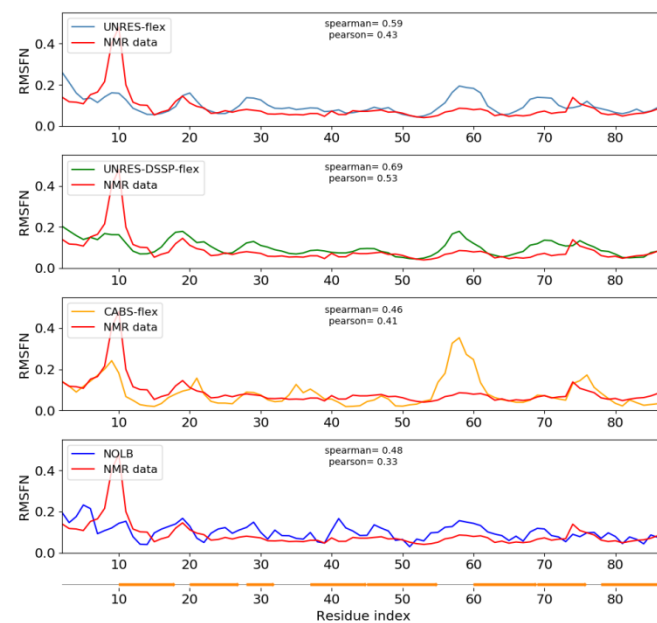

1GAB truncated RMSFN profiles

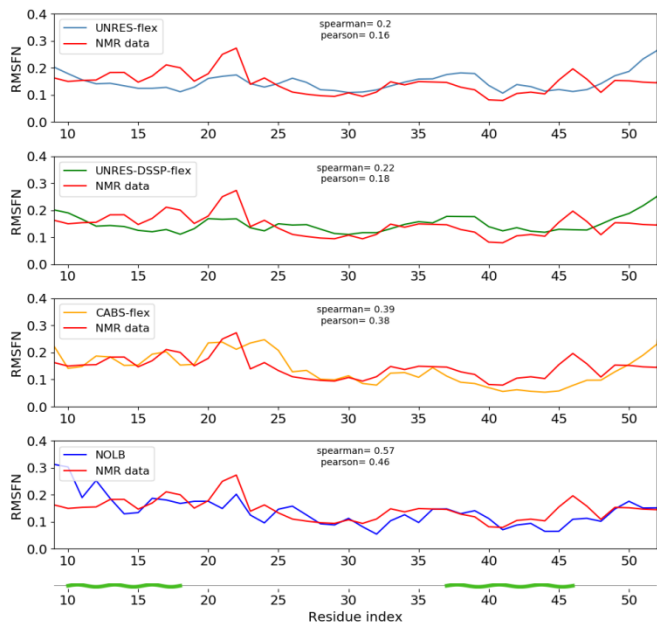

1GHH truncated RMSFN profiles

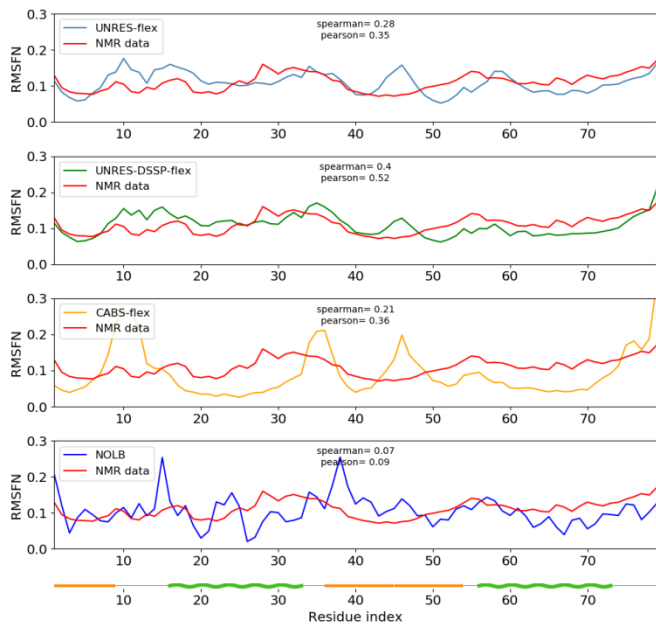

1HNS truncated RMSFN profiles

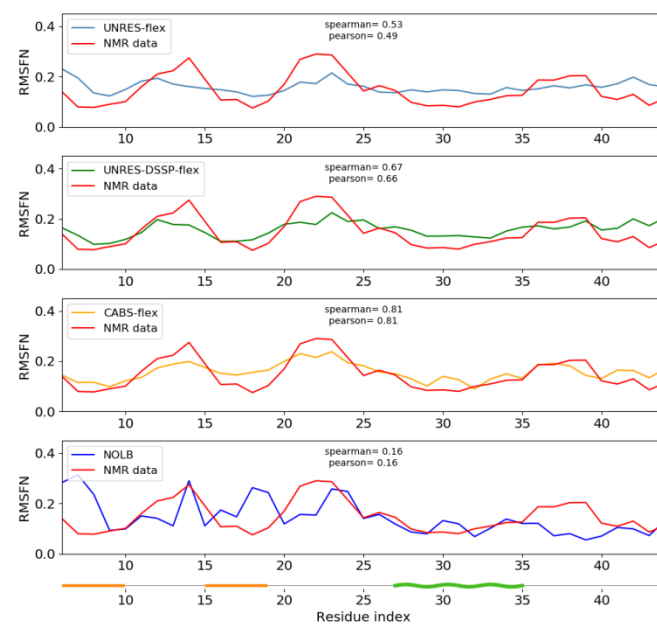

1HRF truncated RMSFN profiles

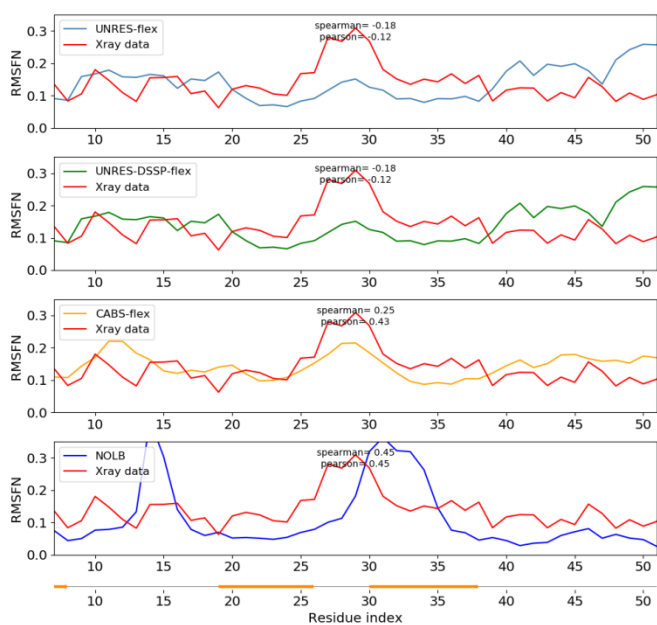

1HYP truncated RMSFN profiles

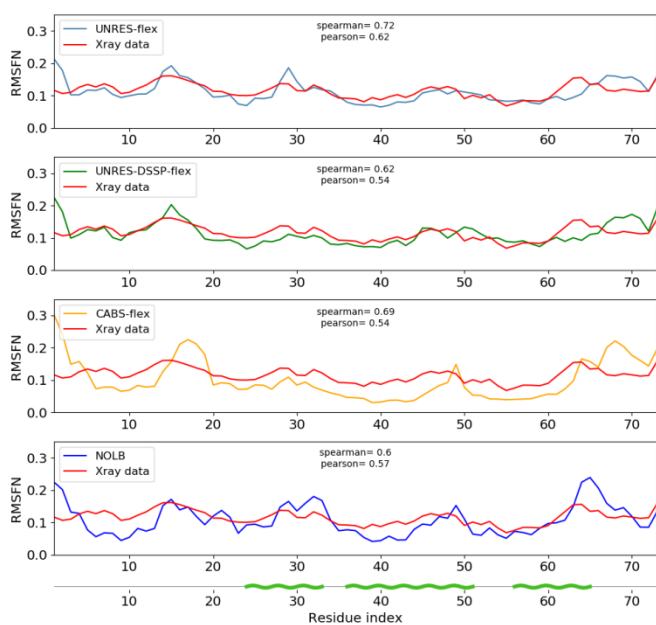

1HYW truncated RMSFN profiles

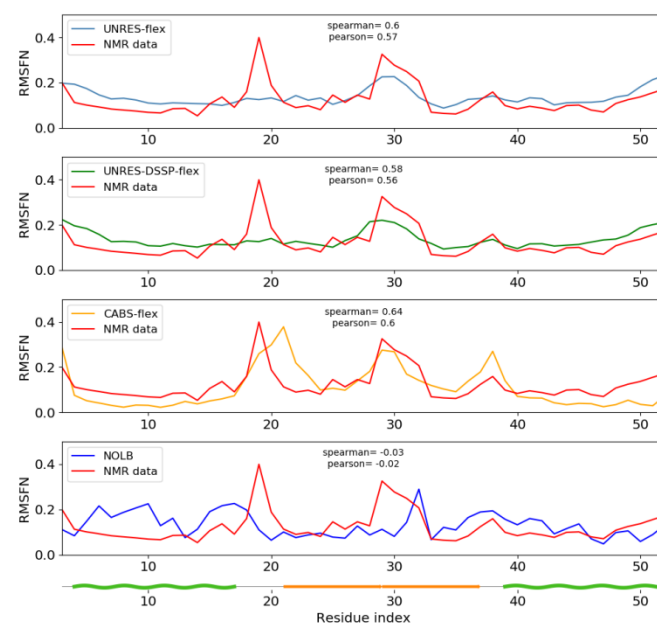

1IG5 truncated RMSFN profiles

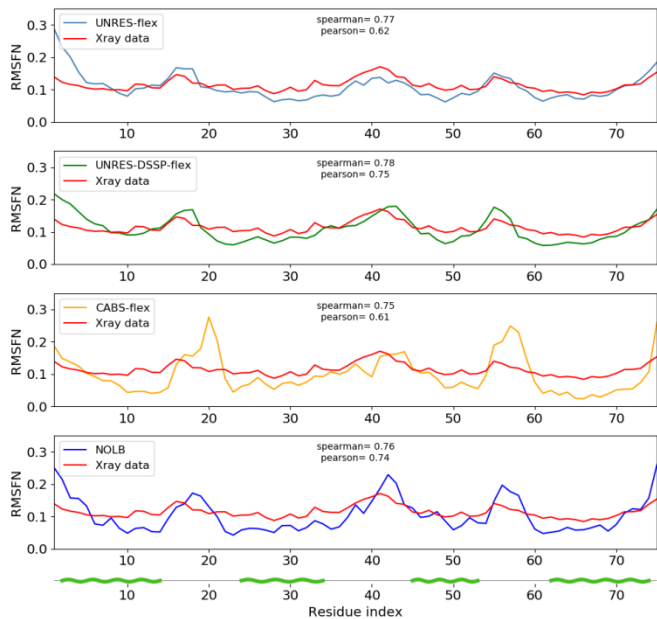

1IQO truncated RMSFN profiles

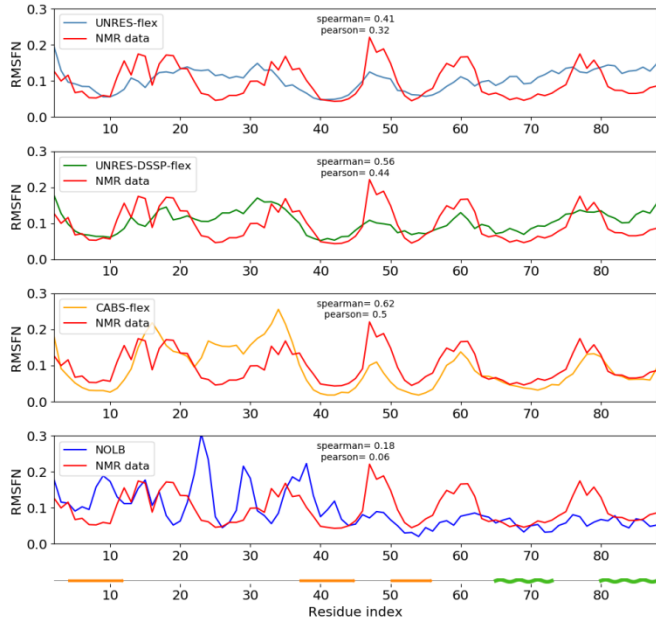

1IYR truncated RMSFN profiles

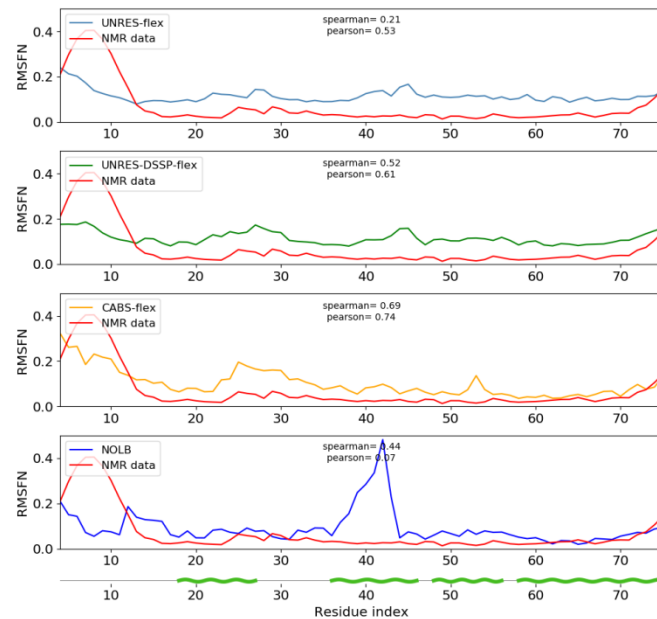

1IYV truncated RMSFN profiles

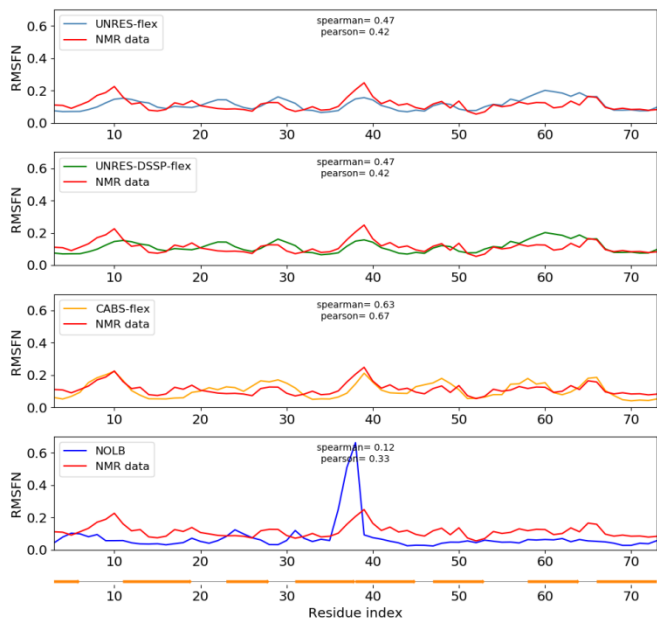

1J7O truncated RMSFN profiles

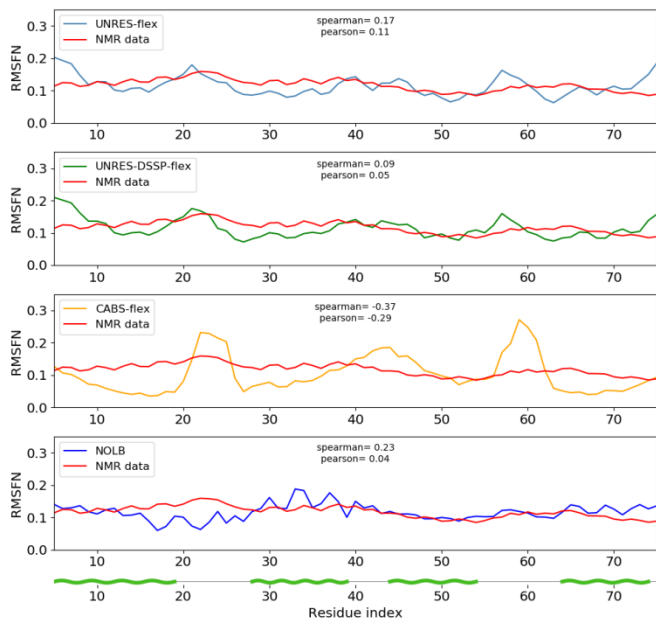

1K8B truncated RMSFN profiles

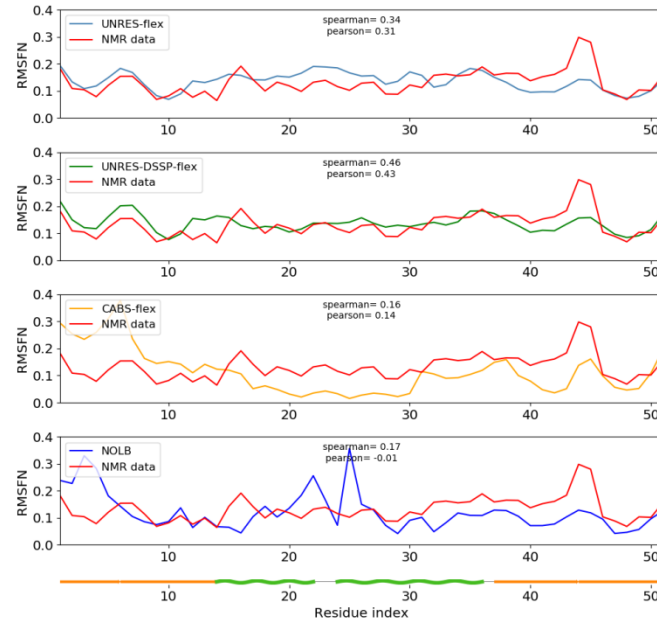

1K40 truncated RMSFN profiles

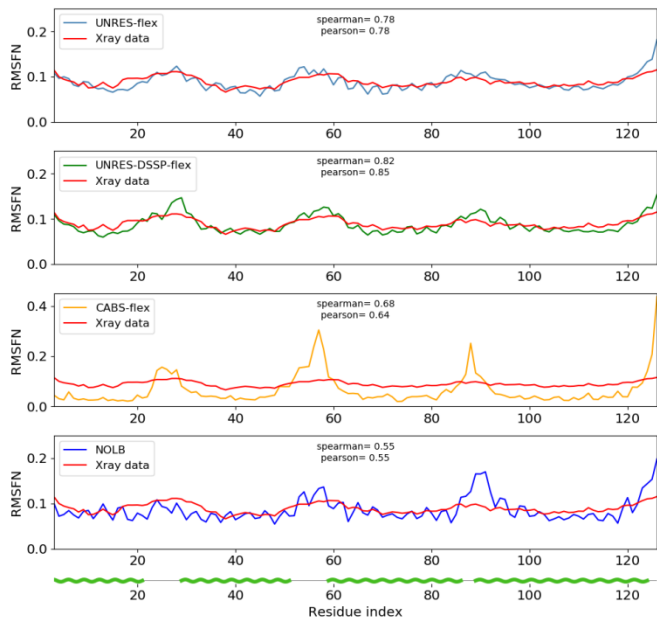

1L2Y truncated RMSFN profiles

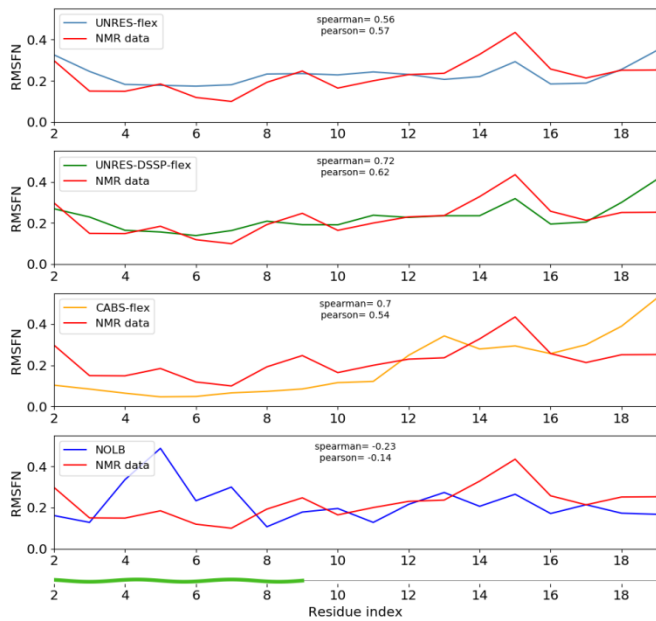

1LEB truncated RMSFN profiles

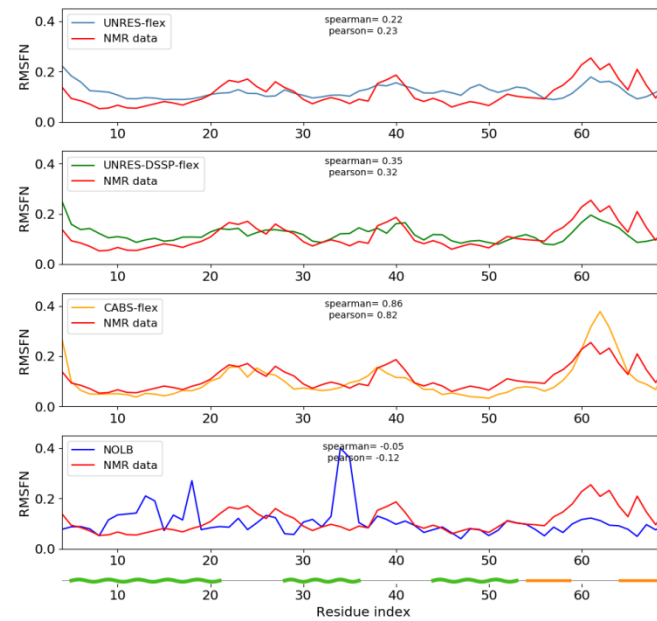

1LQ7 truncated RMSFN profiles

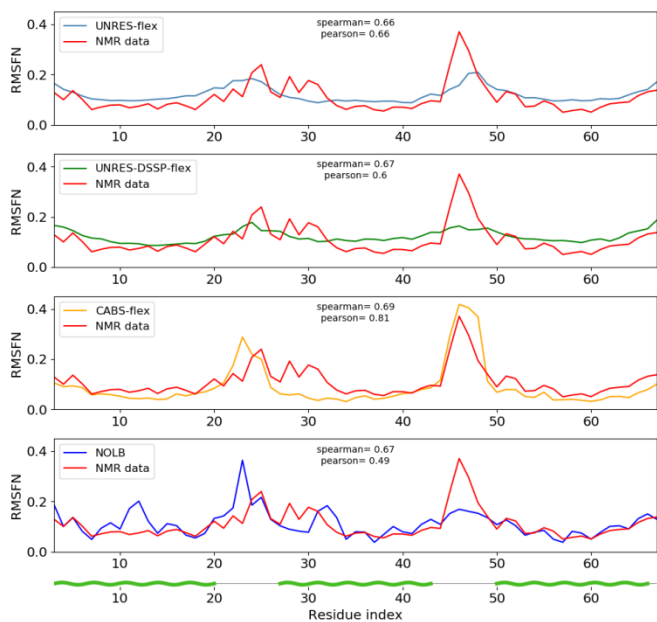

1MJC truncated RMSFN profiles

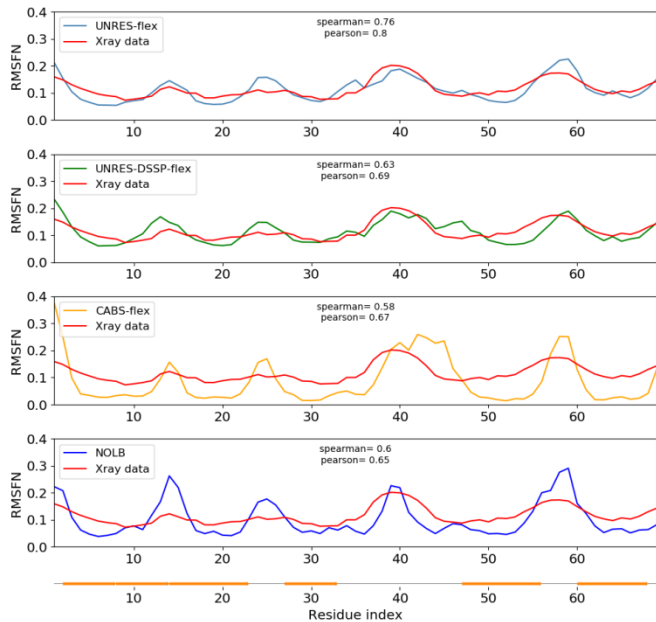

1NOA truncated RMSFN profiles

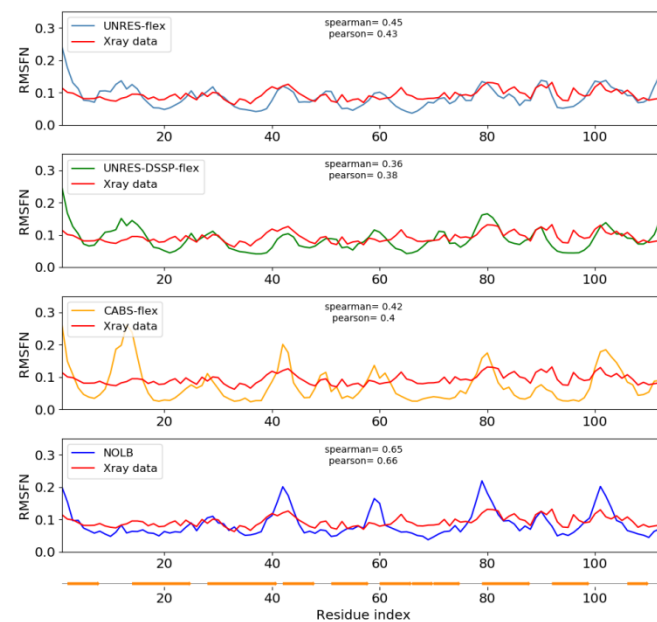

10GQ truncated RMSFN profiles

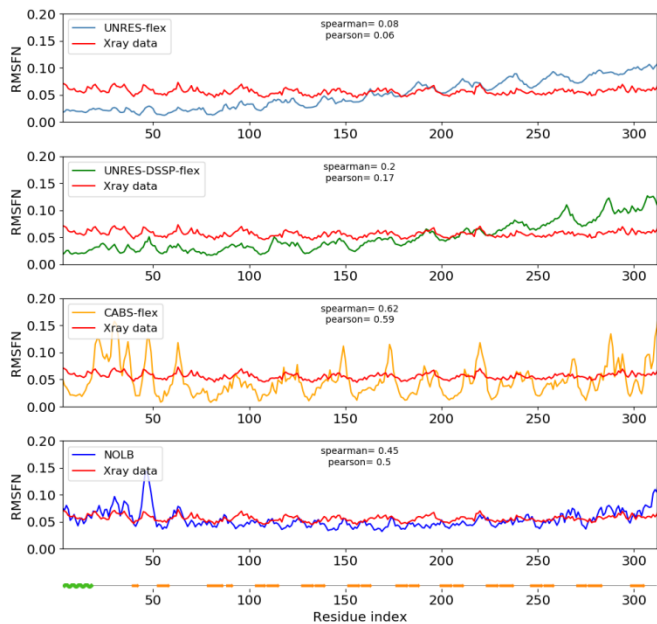

1OIX truncated RMSFN profiles

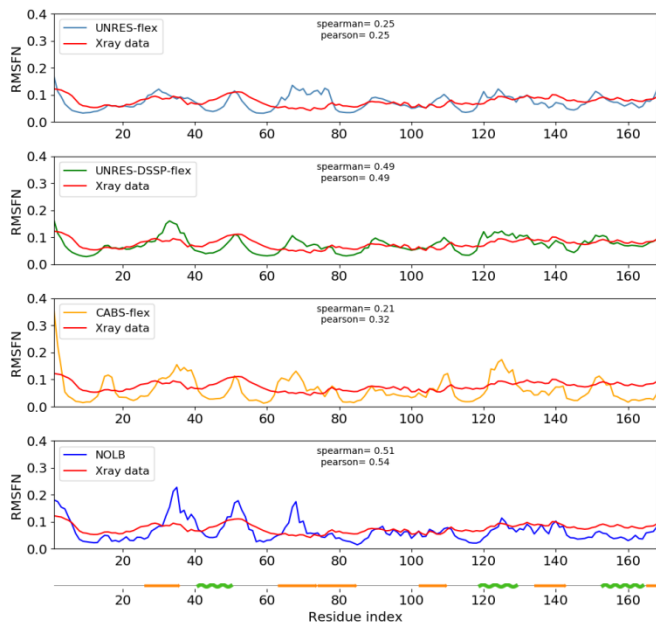

1OPD truncated RMSFN profiles

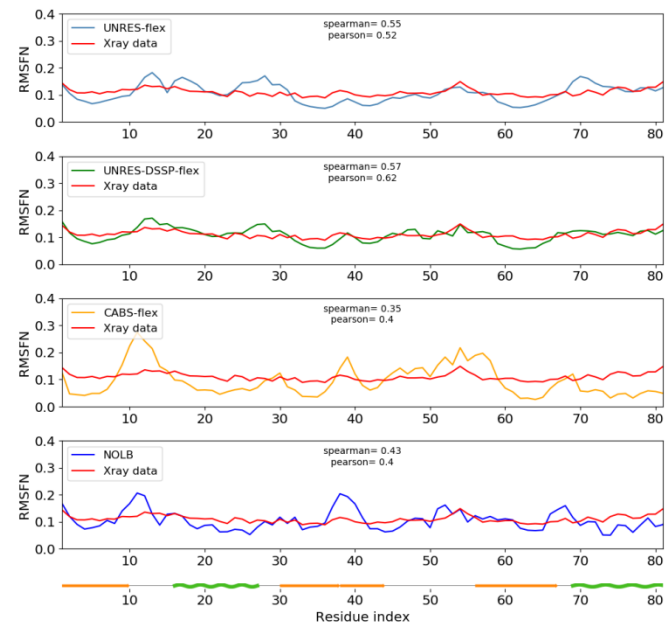

1P68 truncated RMSFN profiles

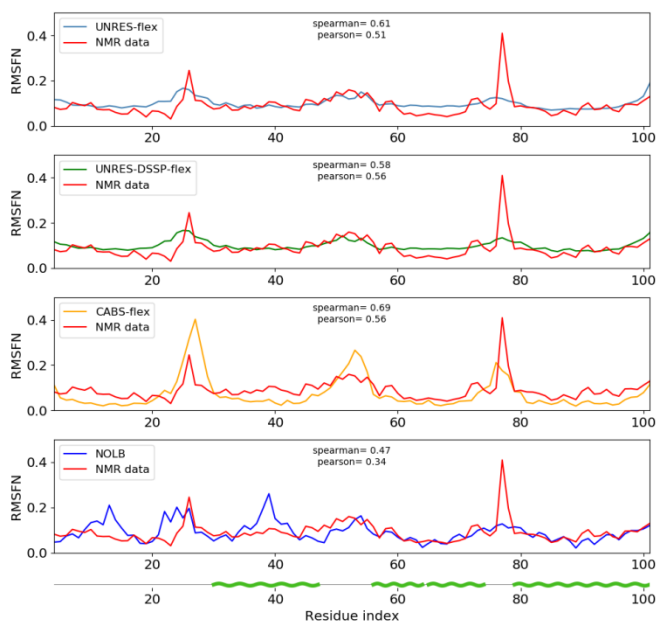

1PGA truncated RMSFN profiles

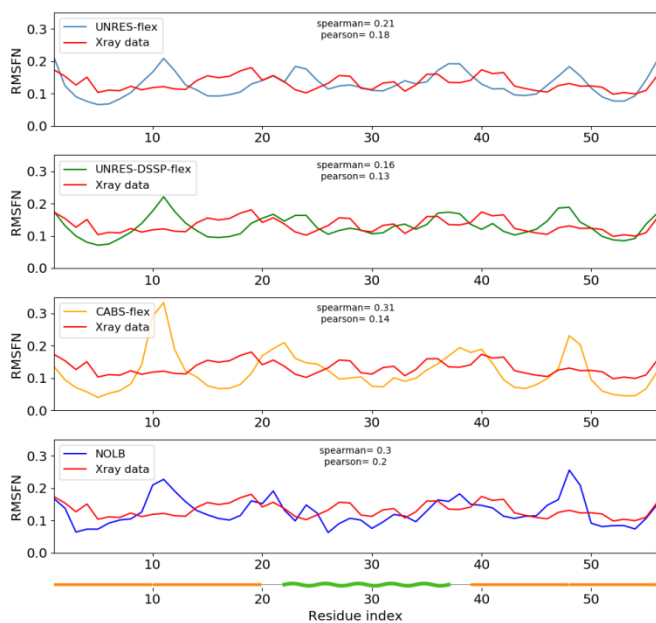

1PHT truncated RMSFN profiles

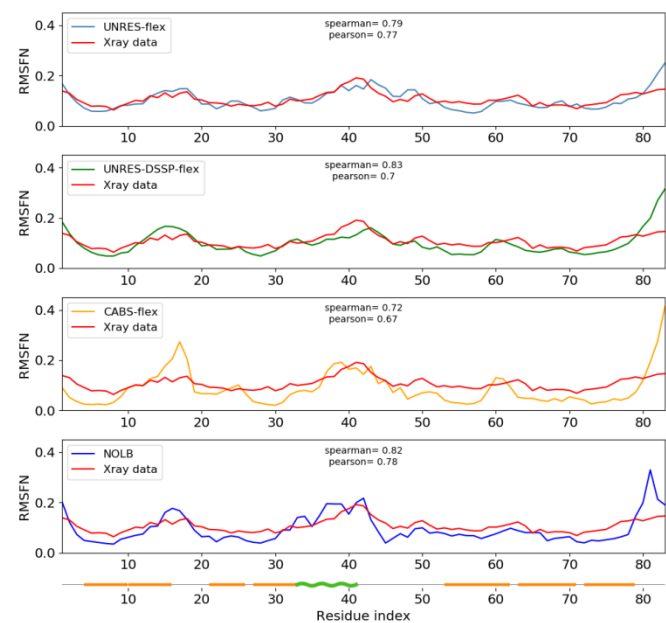

1POU truncated RMSFN profiles

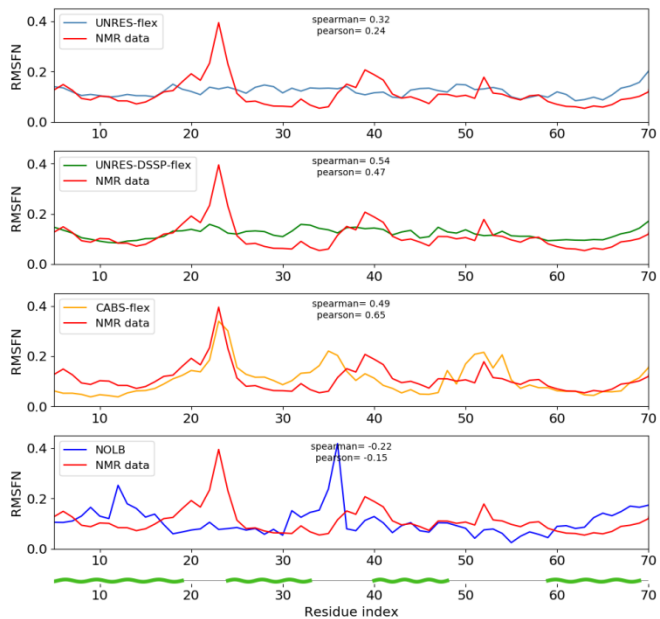

1PRV truncated RMSFN profiles

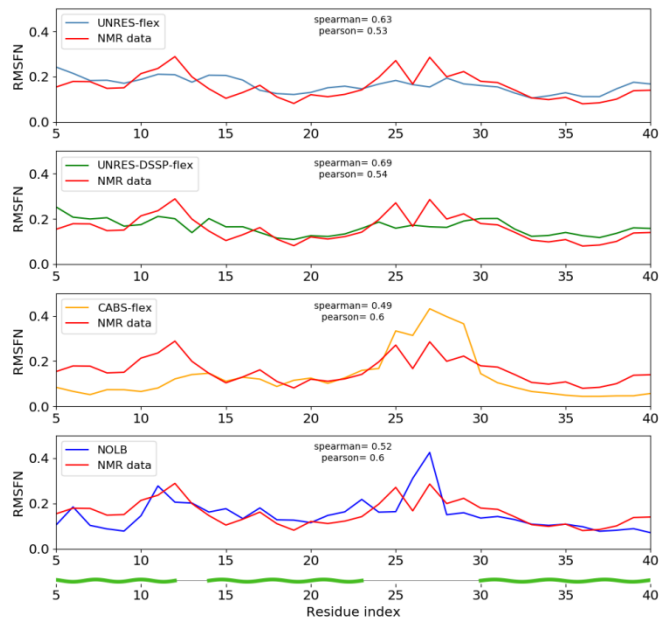

1PTF truncated RMSFN profiles

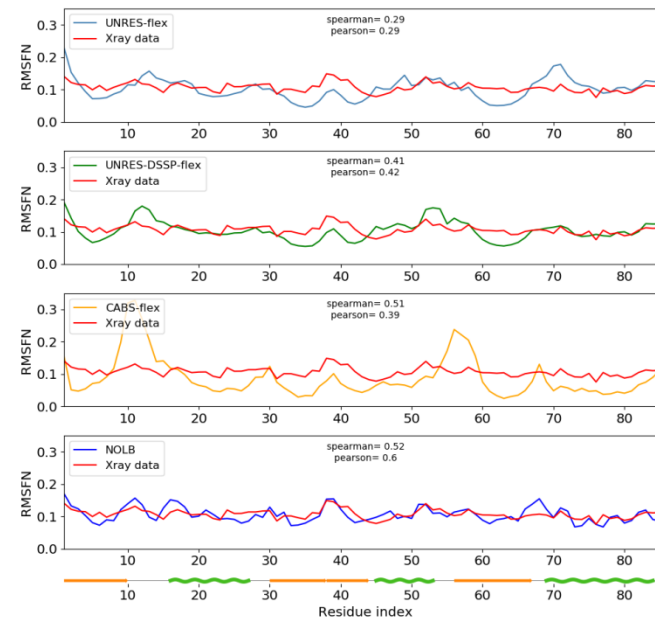

1QRE truncated RMSFN profiles

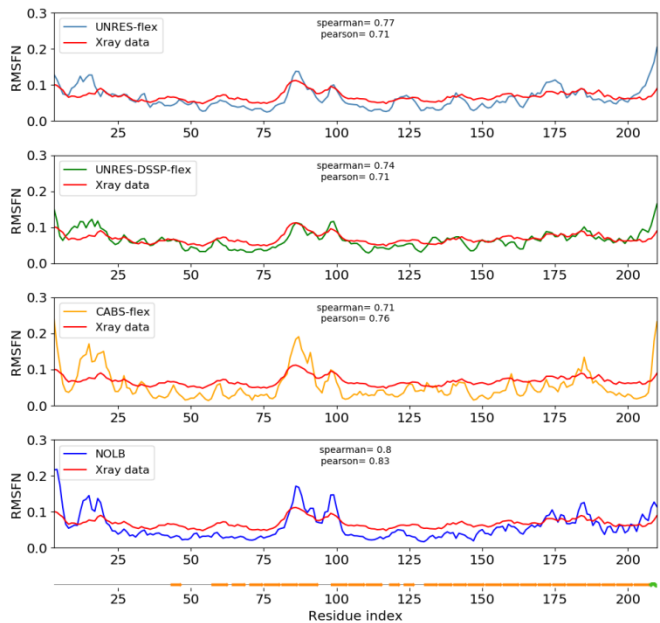

1RIJ truncated RMSFN profiles

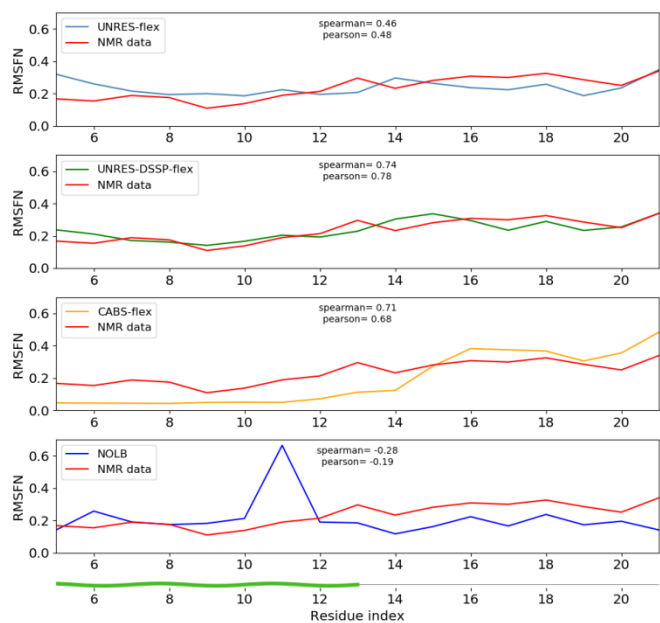

1ROP truncated RMSFN profiles

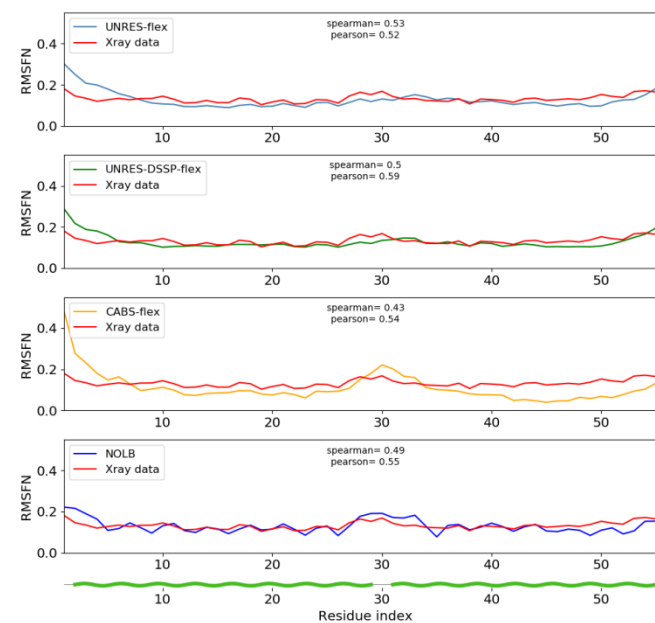

1RUW truncated RMSFN profiles

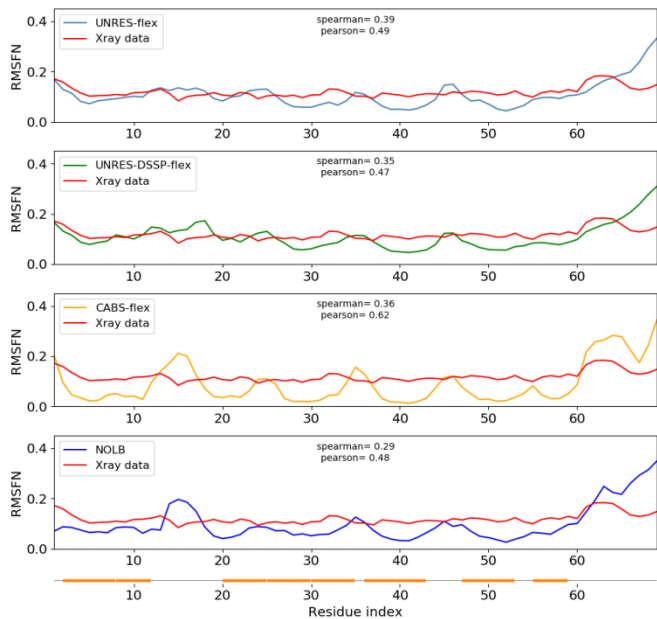

1STU truncated RMSFN profiles

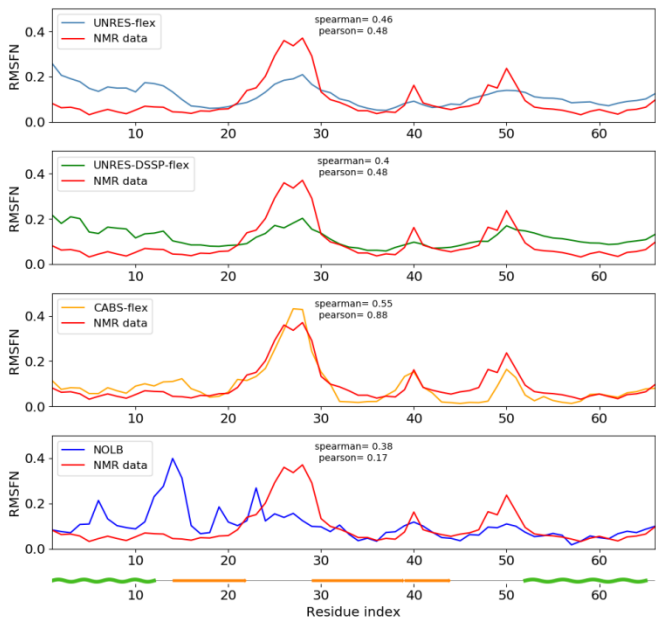

1TEN truncated RMSFN profiles

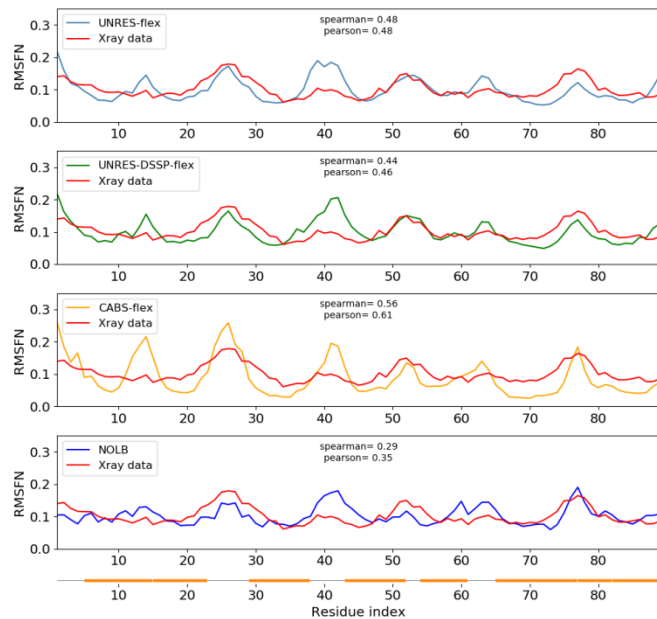

1THX truncated RMSFN profiles

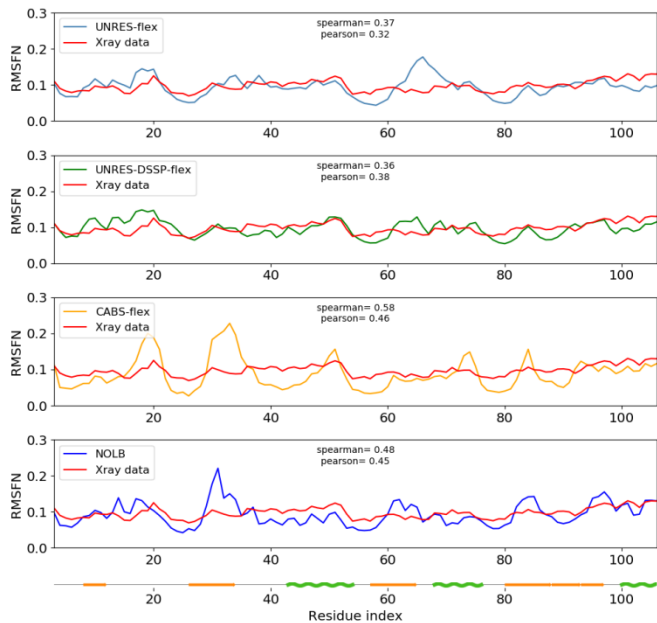

1TIG truncated RMSFN profiles

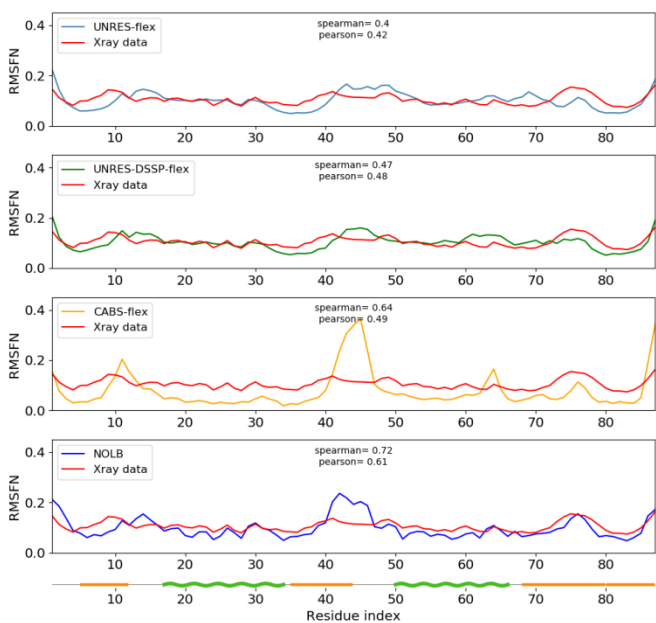

1TPN truncated RMSFN profiles

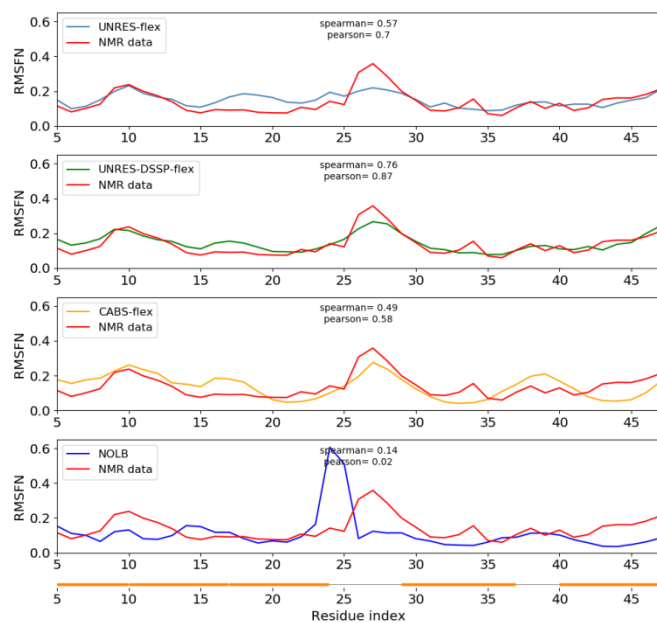

1UBQ truncated RMSFN profiles

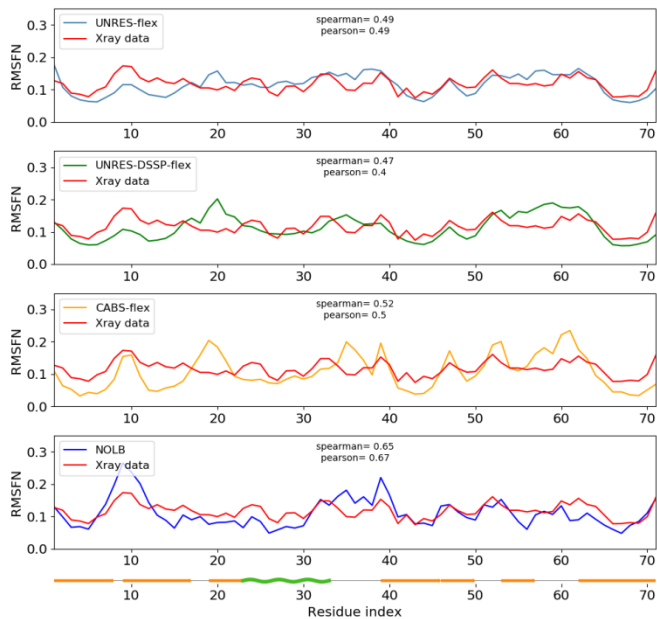

1VIG truncated RMSFN profiles

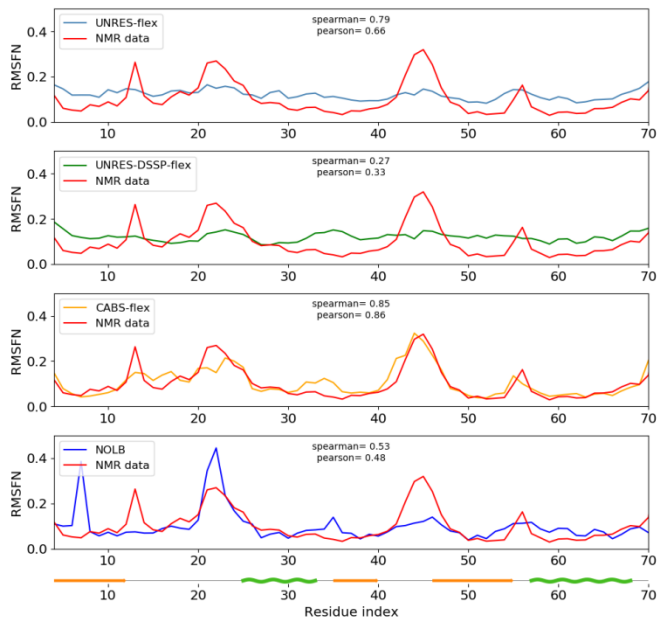

1WIU truncated RMSFN profiles

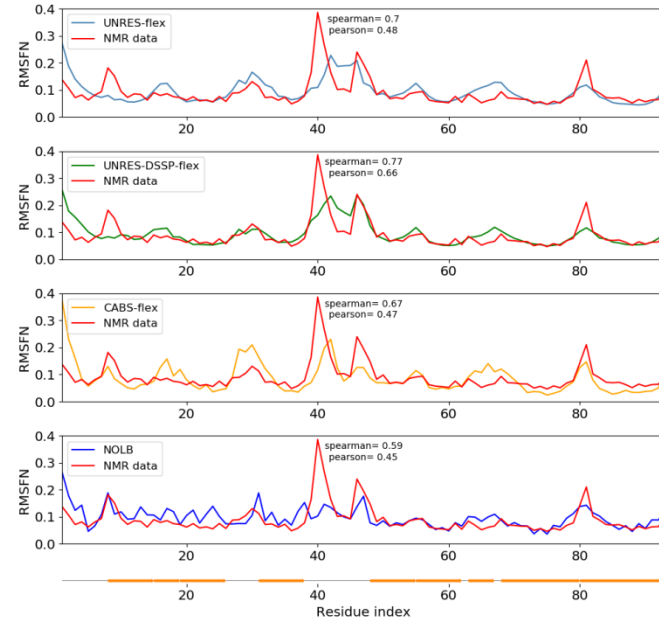

1WKT truncated RMSFN profiles

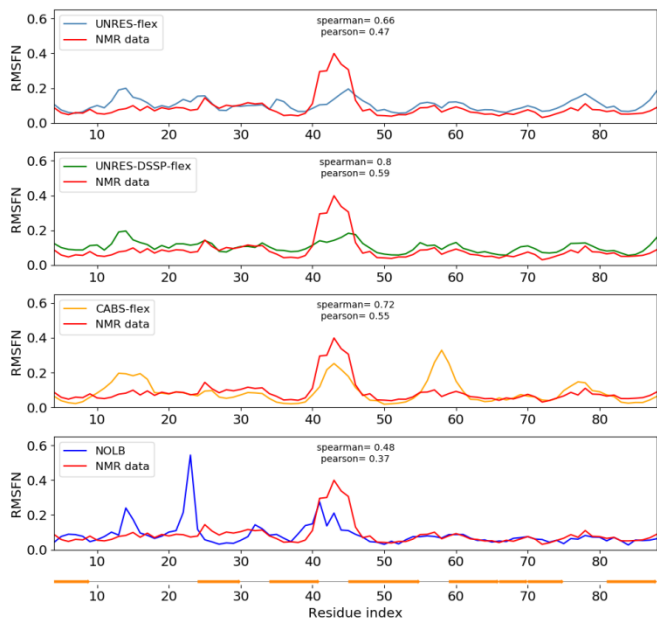

1XCD truncated RMSFN profiles

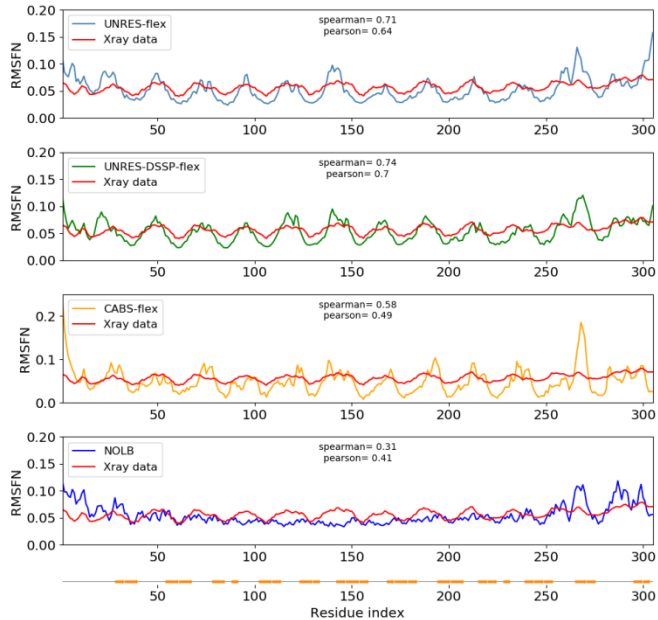

1YRF truncated RMSFN profiles

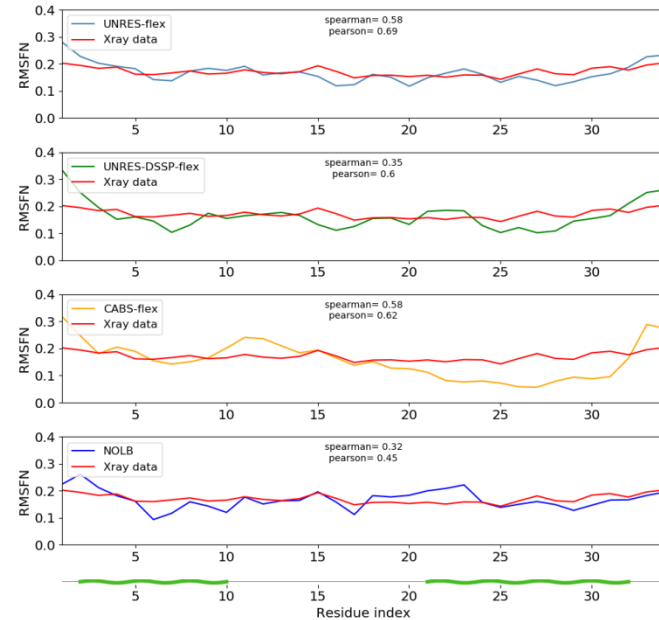



2ACY truncated RMSFN profiles

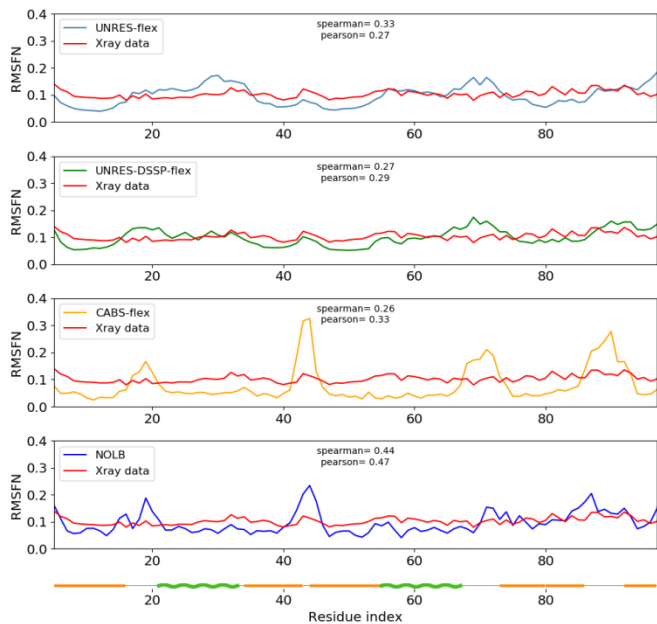

2BBY truncated RMSFN profiles

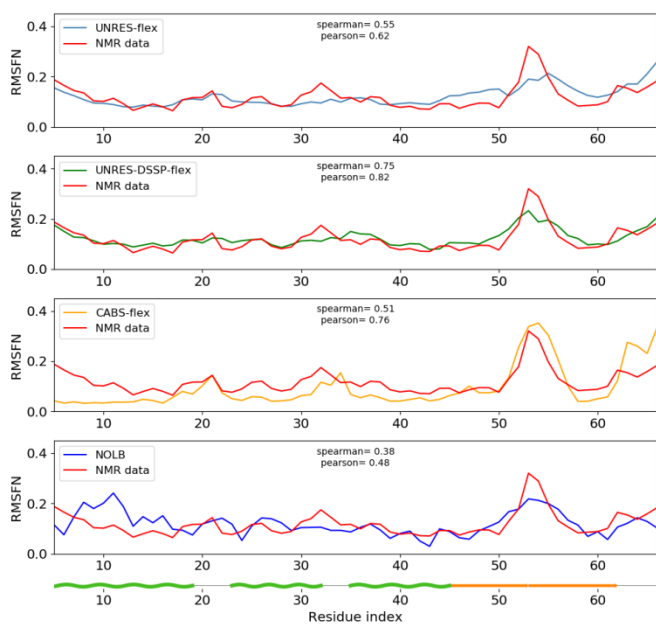

2BF9 truncated RMSFN profiles

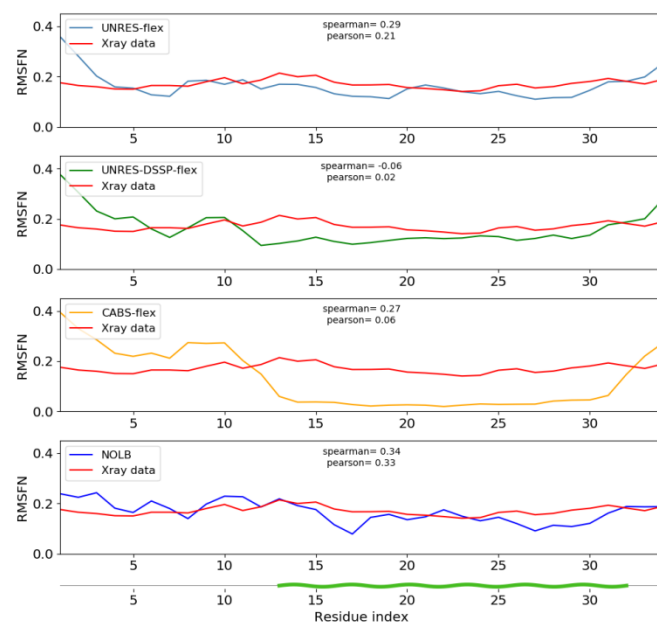

2CRB truncated RMSFN profiles

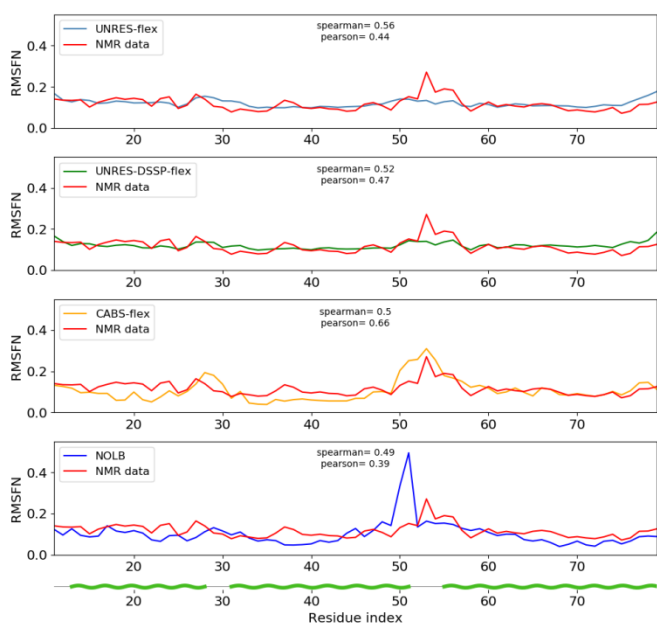

2E7N truncated RMSFN profiles

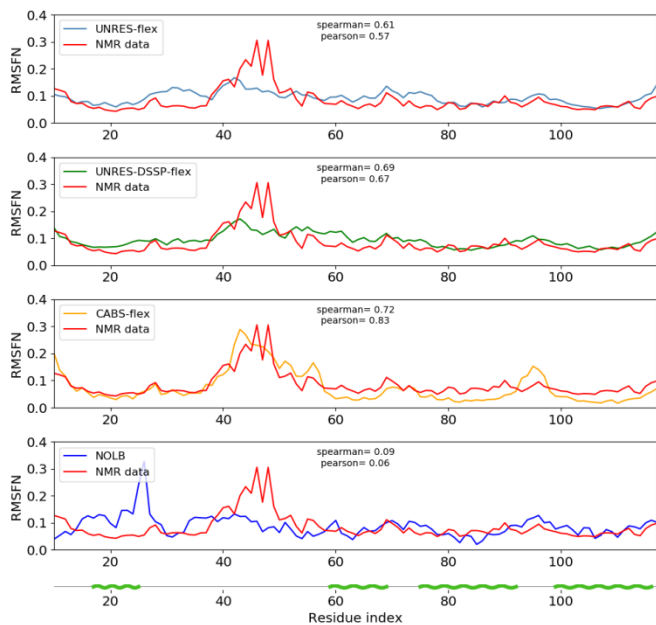

2FMR truncated RMSFN profiles

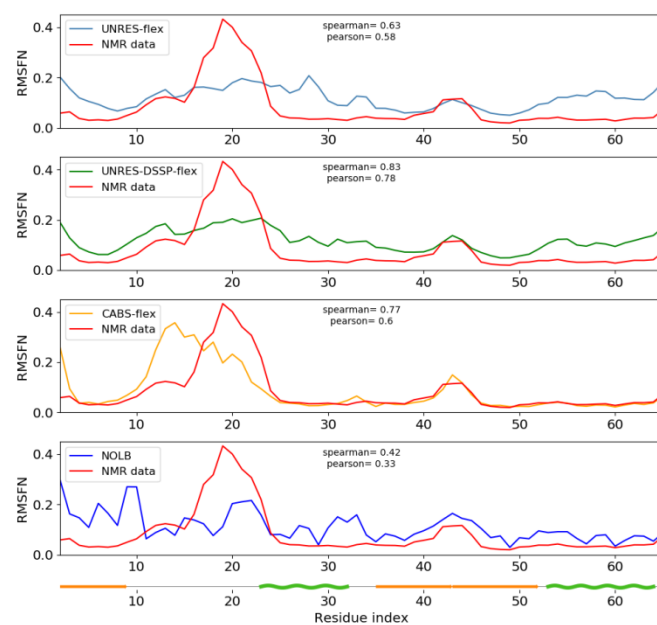

2HEP truncated RMSFN profiles

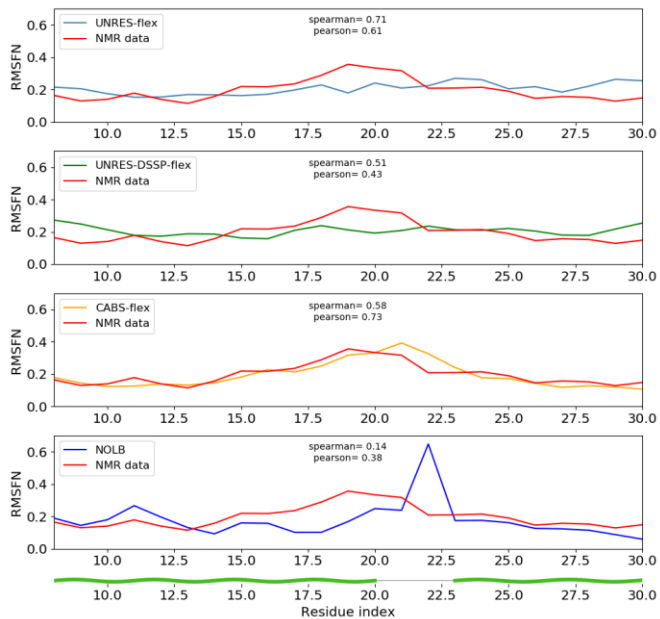

2HI3 truncated RMSFN profiles

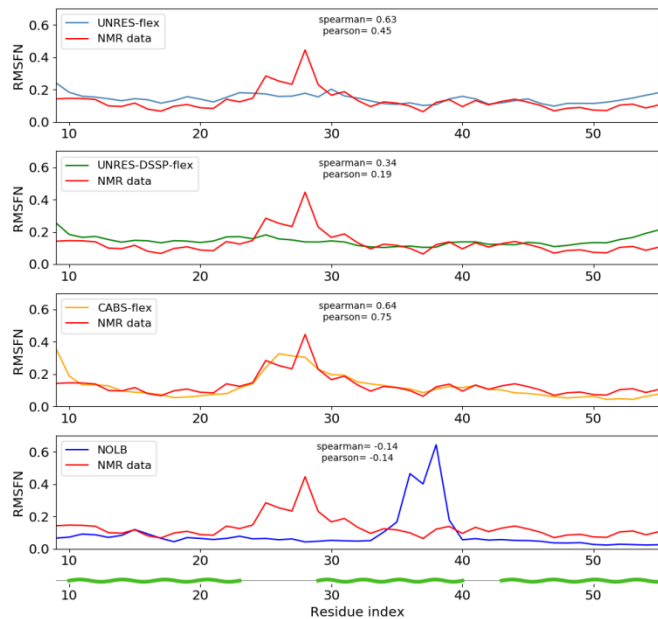

2K9G truncated RMSFN profiles

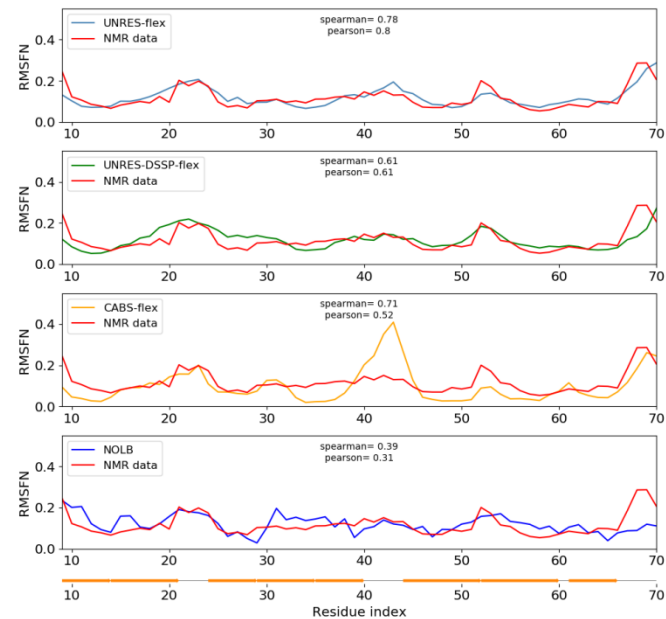

2KYW truncated RMSFN profiles

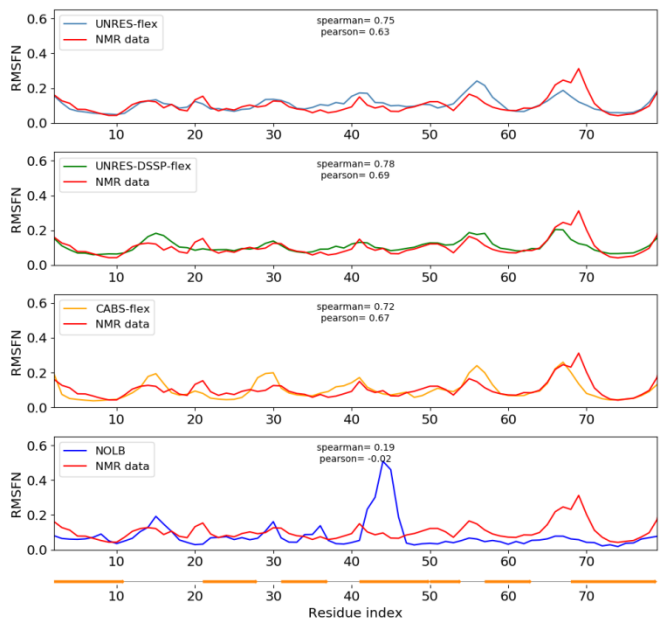

2L09 truncated RMSFN profiles

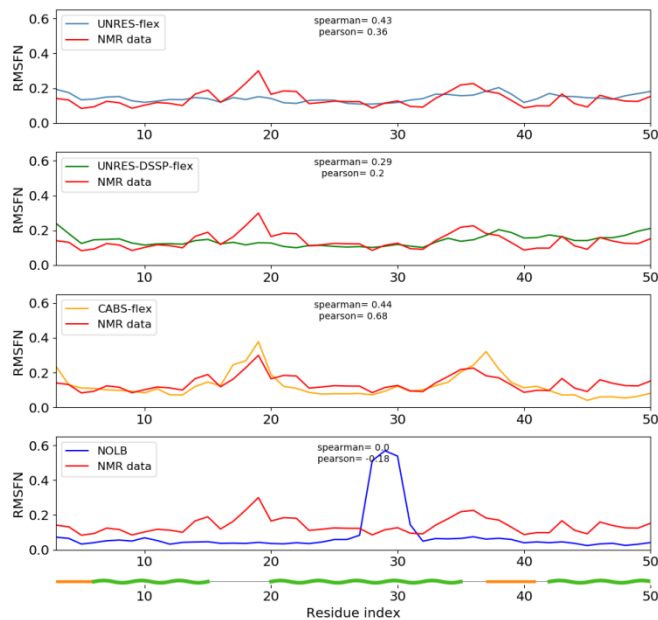

2LGN truncated RMSFN profiles

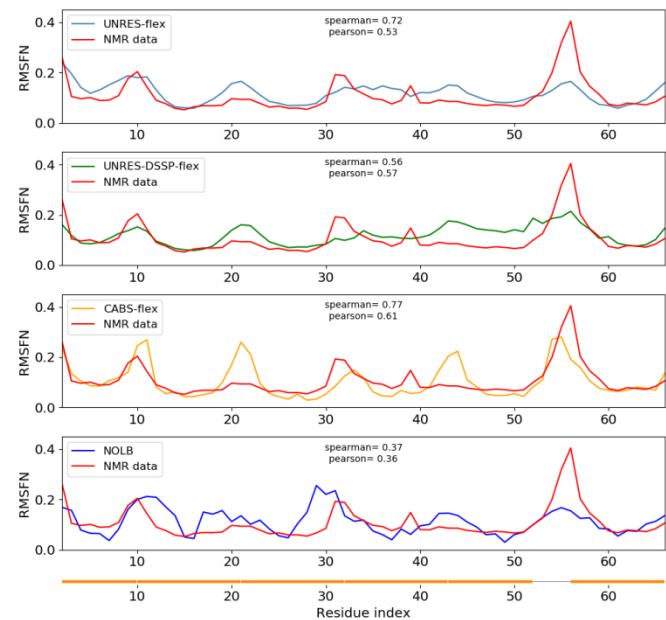

2LVC truncated RMSFN profiles

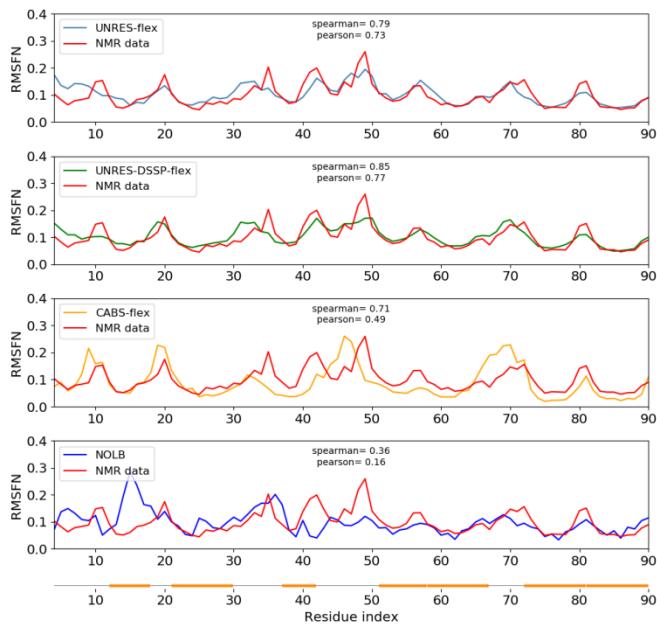

2LZM truncated RMSFN profiles

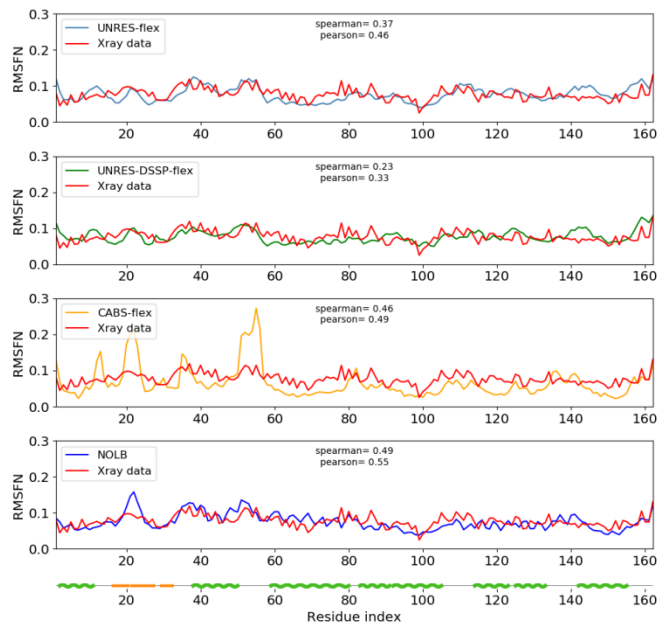

2M6Q truncated RMSFN profiles

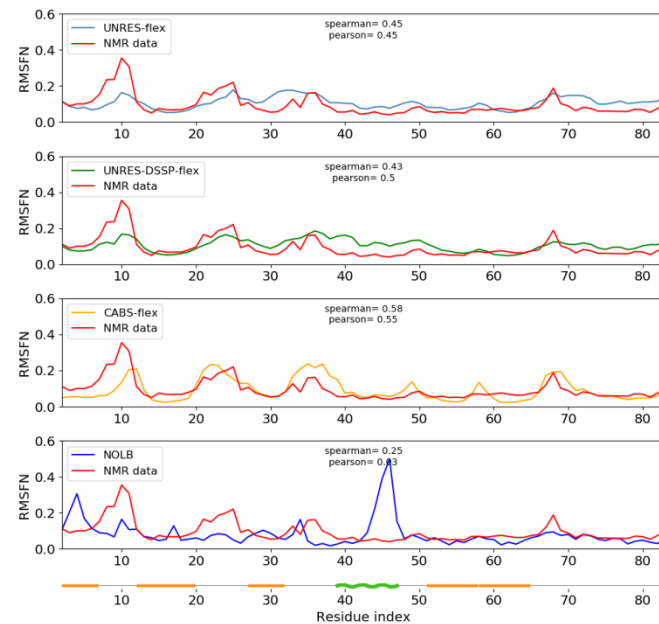

2MQ8 truncated RMSFN profiles

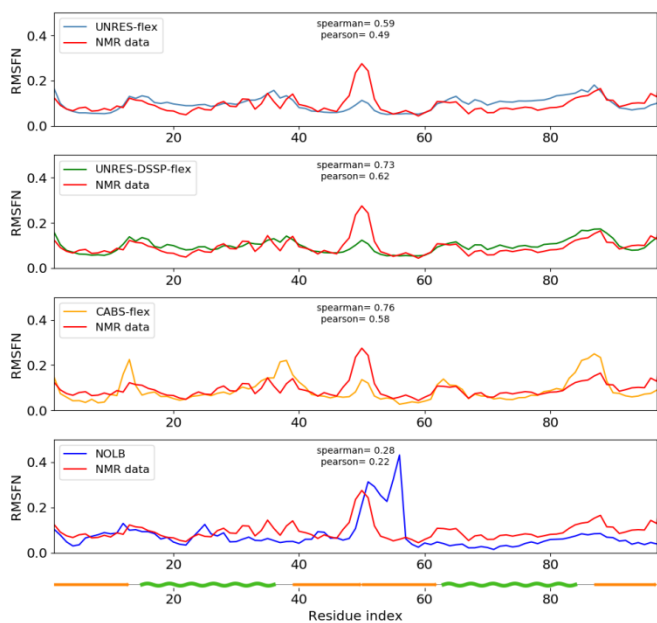

2N2U truncated RMSFN profiles

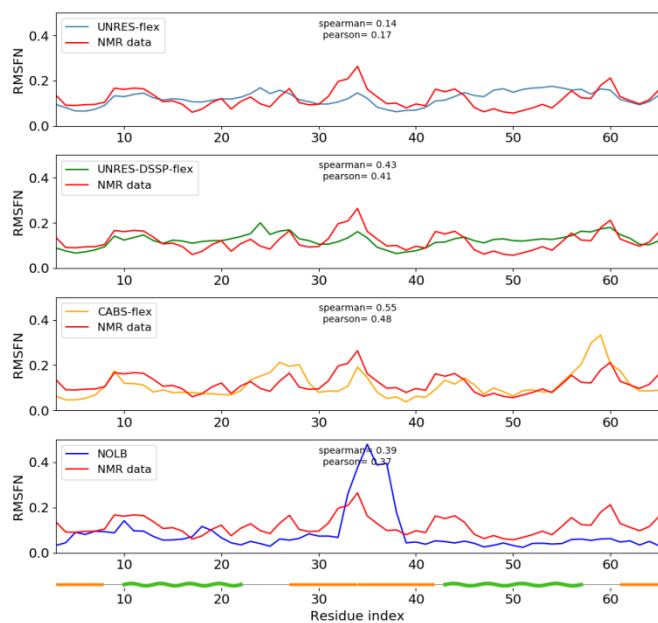

2PTL truncated RMSFN profiles

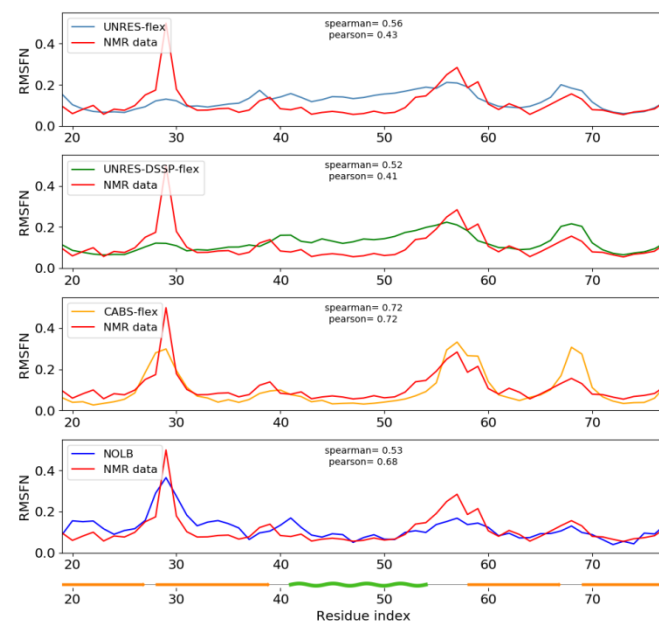

2RGF truncated RMSFN profiles

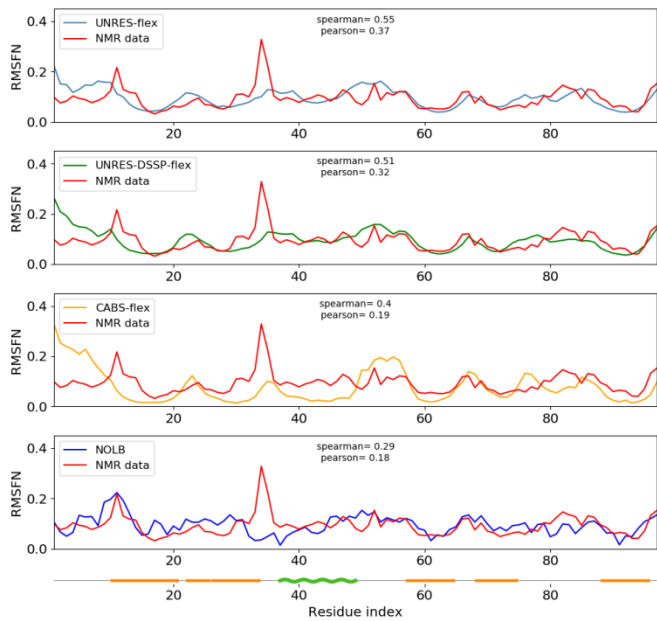

2YGS truncated RMSFN profiles

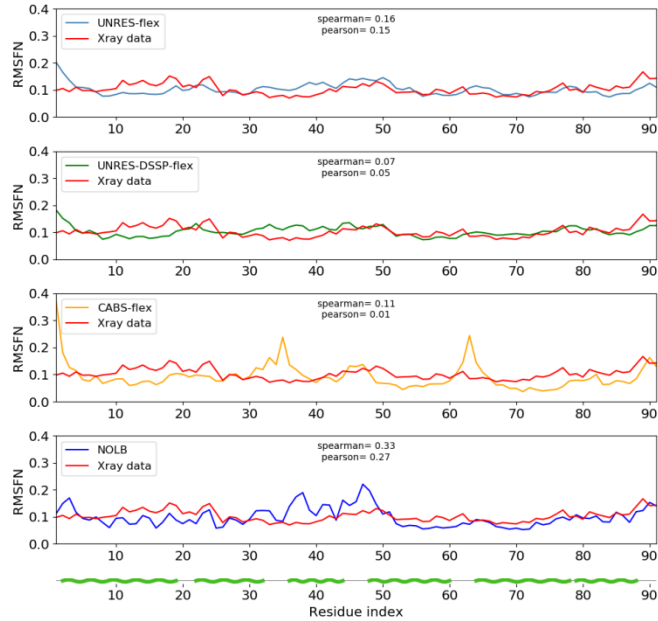

3CI2 truncated RMSFN profiles

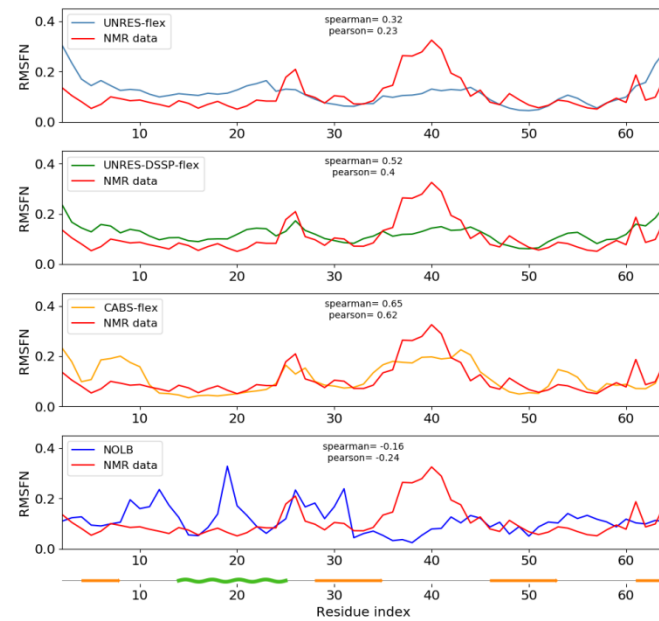

3E8Y truncated RMSFN profiles

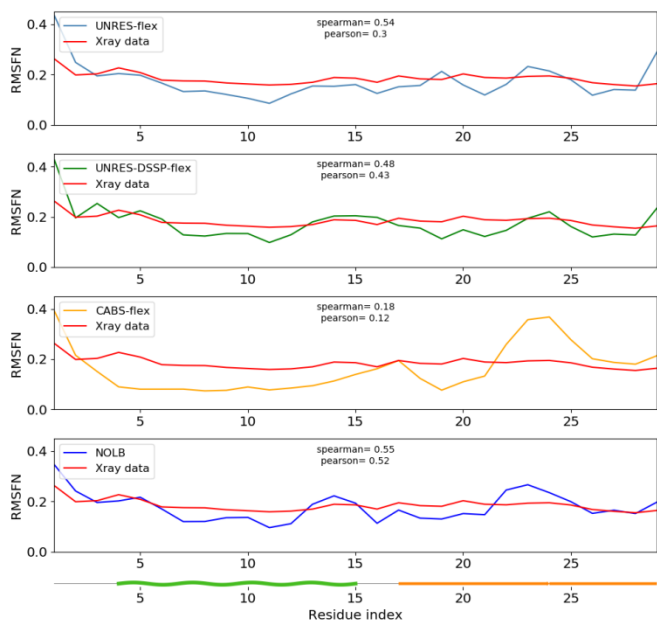

3ICB truncated RMSFN profiles

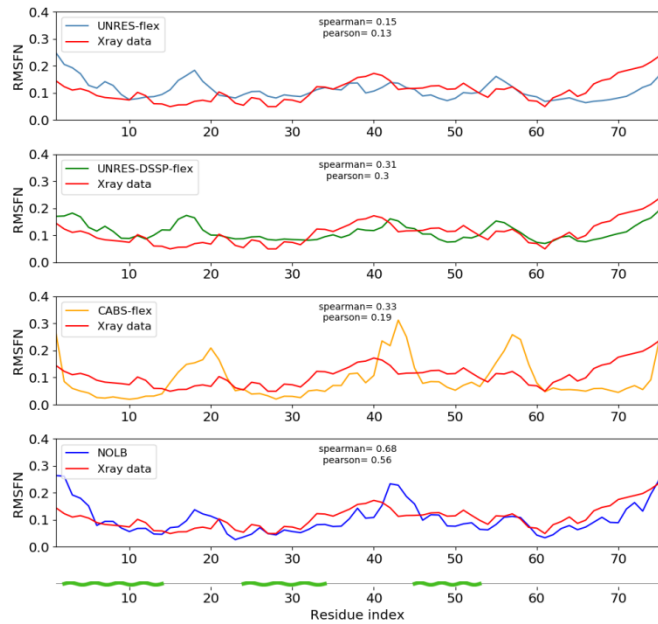

3KYW truncated RMSFN profiles

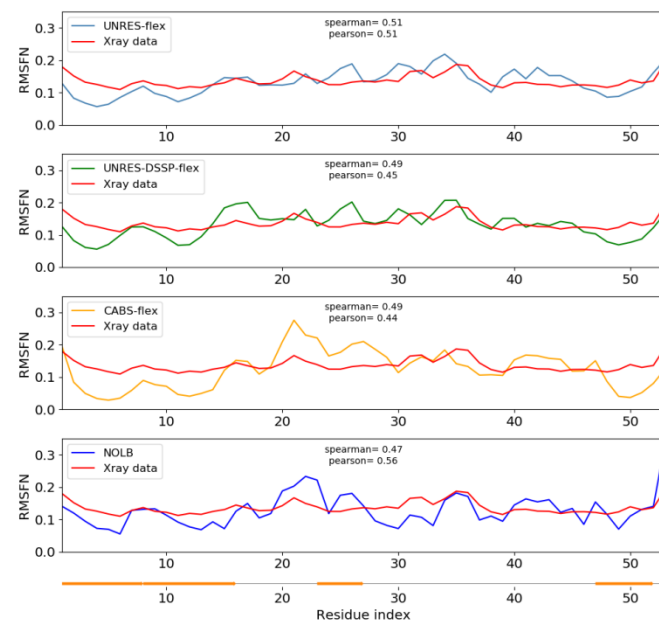

3KYY truncated RMSFN profiles

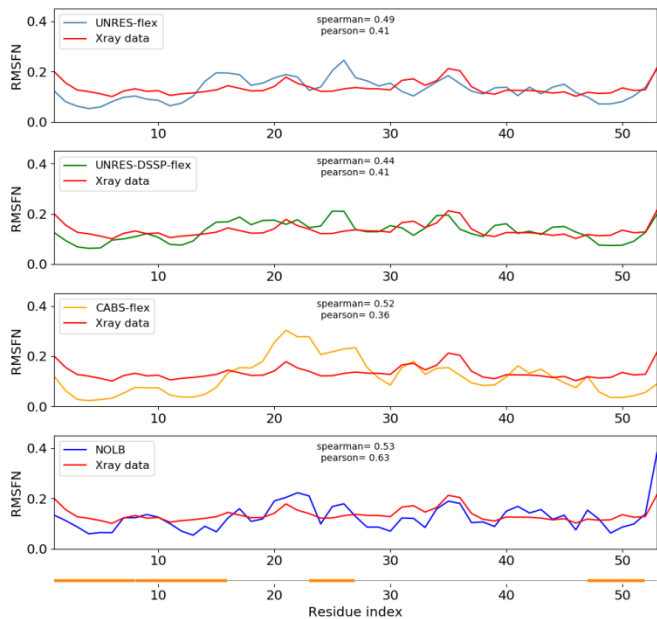

3NCM truncated RMSFN profiles

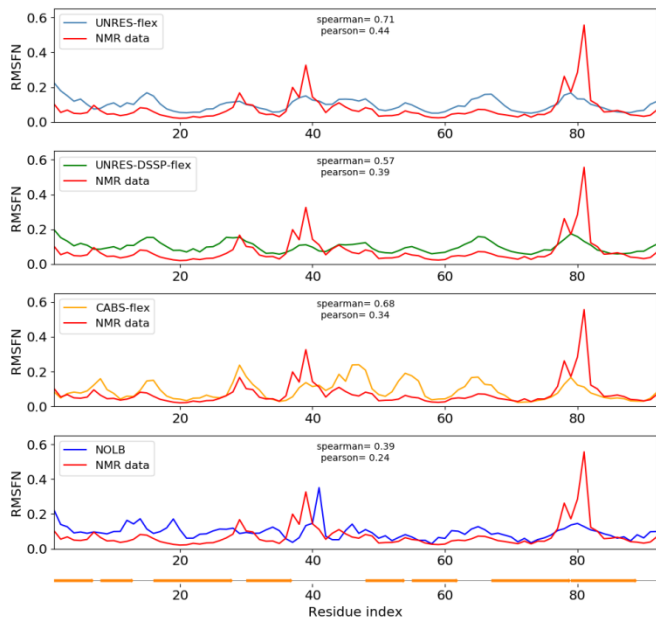

3PUC truncated RMSFN profiles

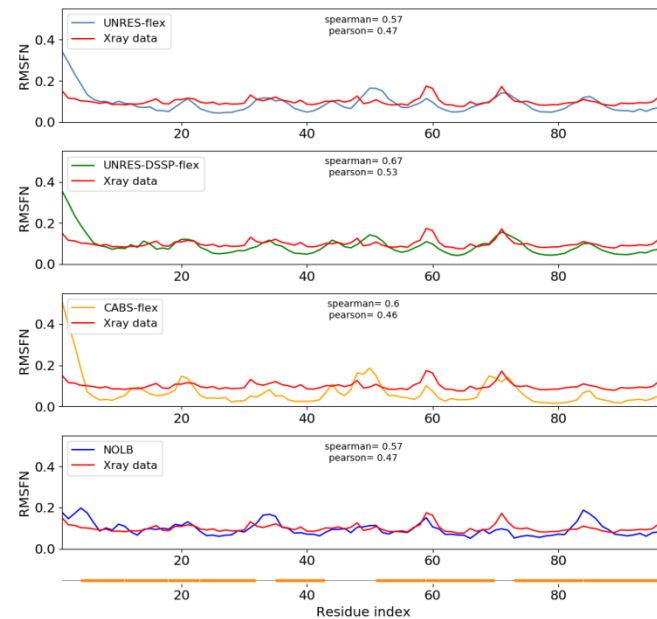

3FW truncated RMSFN profiles

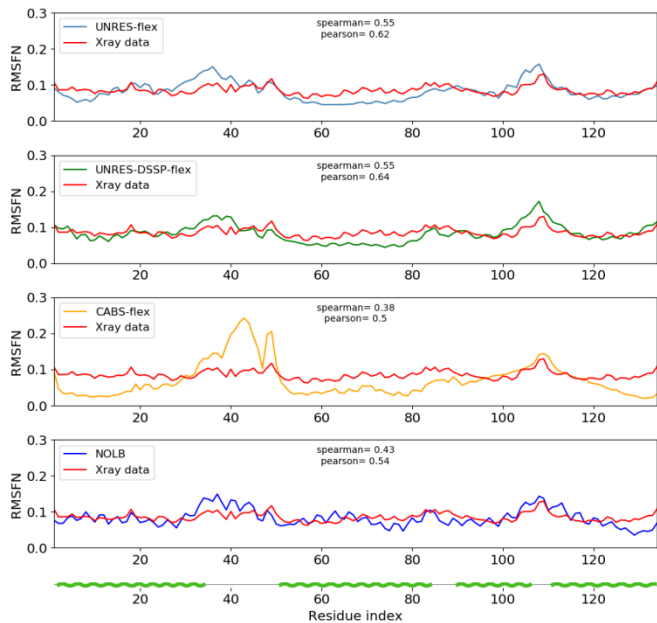

4F98 truncated RMSFN profiles

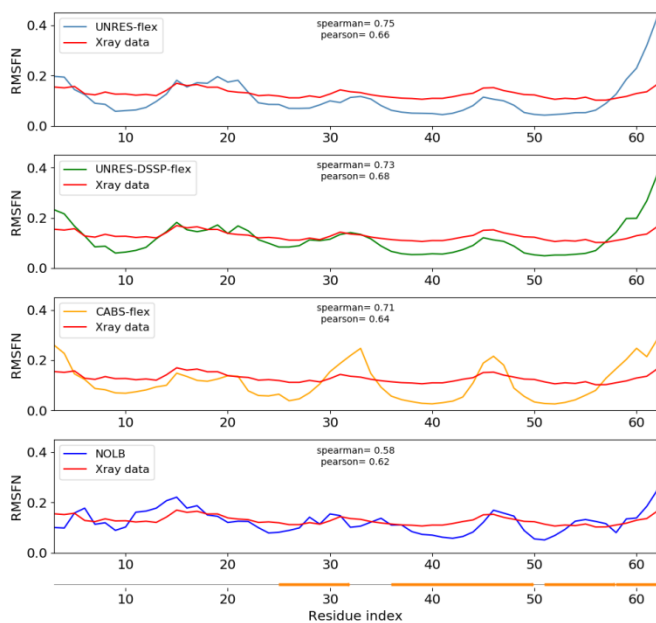

4M90 truncated RMSFN profiles

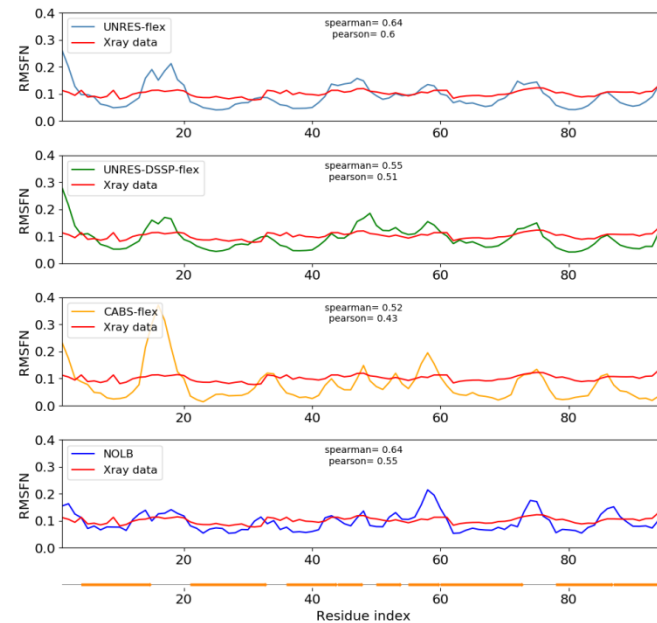

4N6T truncated RMSFN profiles

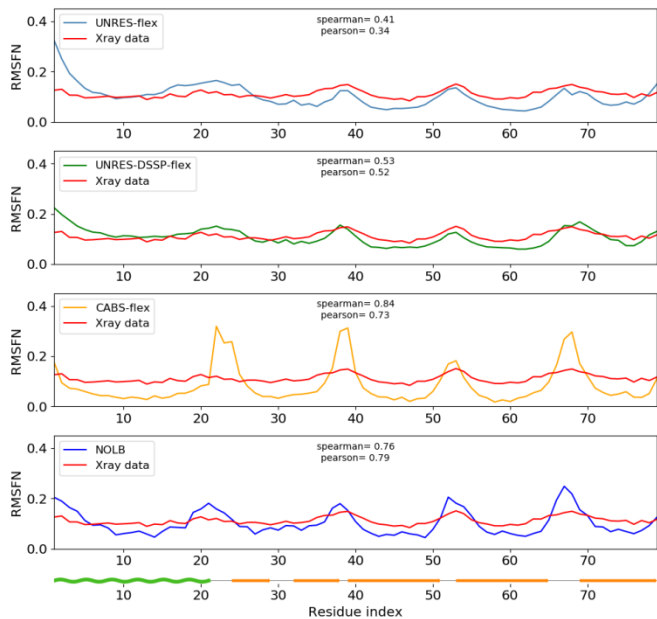

4OZU truncated RMSFN profiles

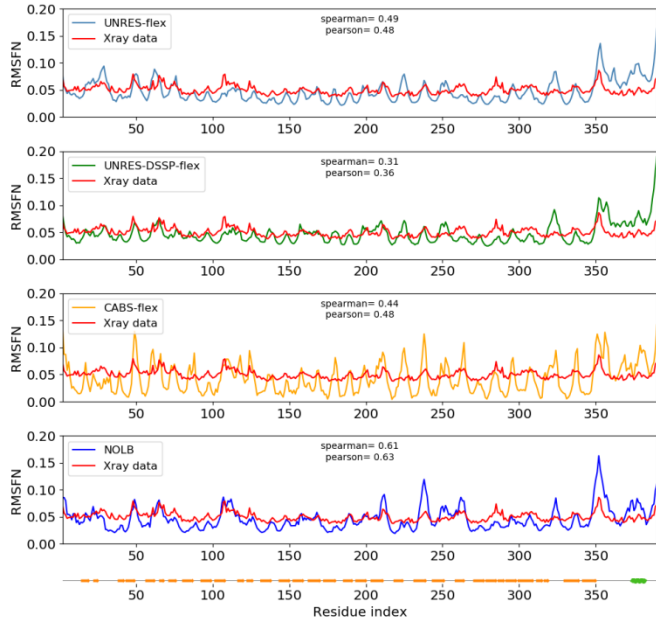

4QRL truncated RMSFN profiles

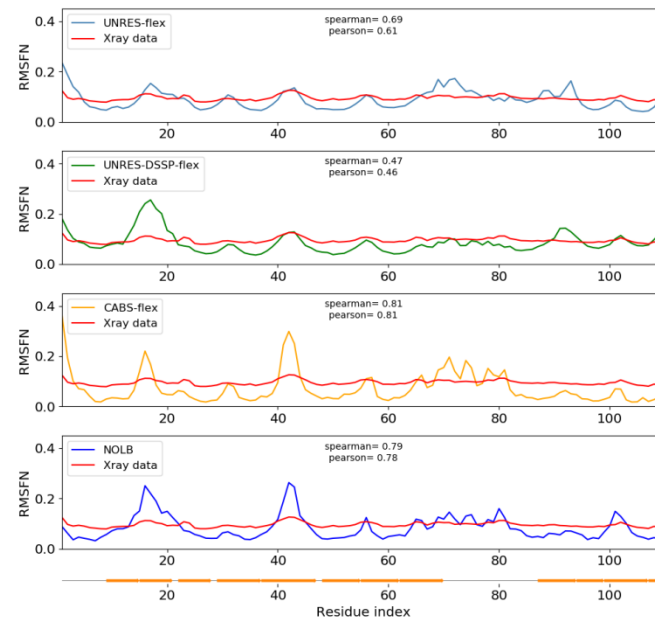

4R7E truncated RMSFN profiles

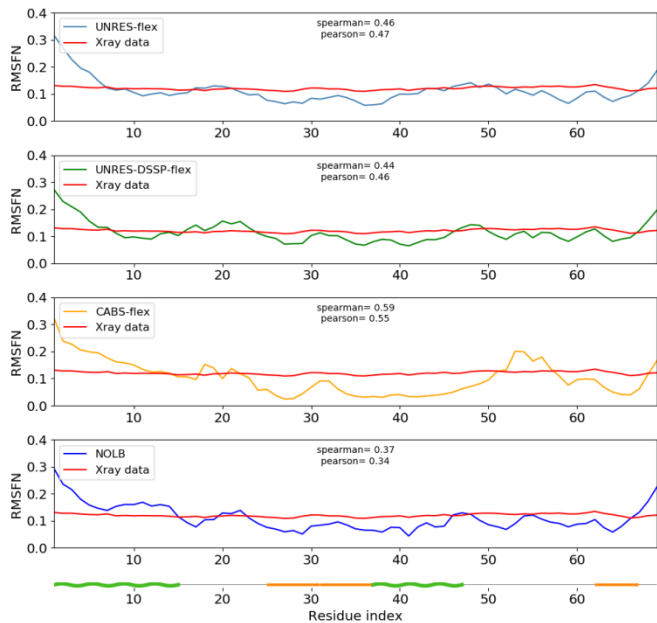

4RTE truncated RMSFN profiles

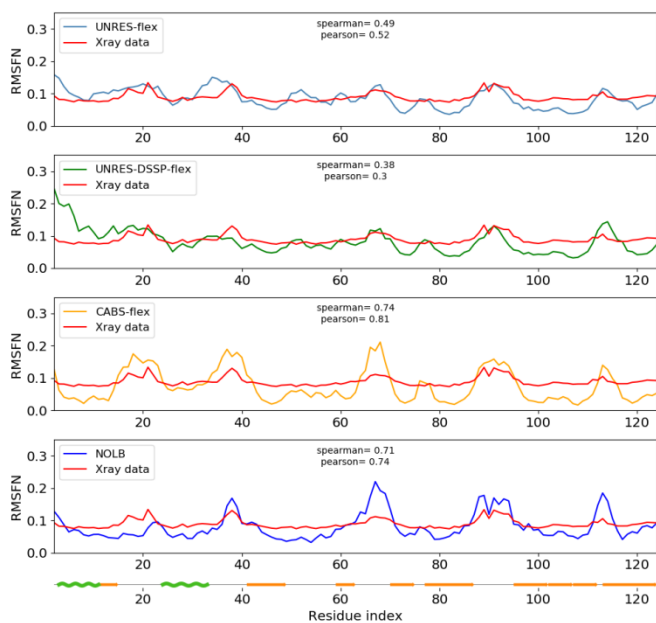

5D14 truncated RMSFN profiles

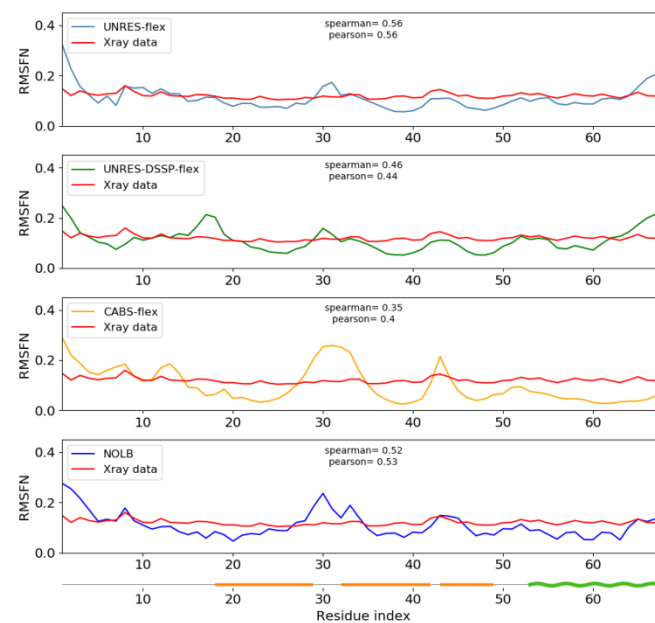

6DNB truncated RMSFN profiles

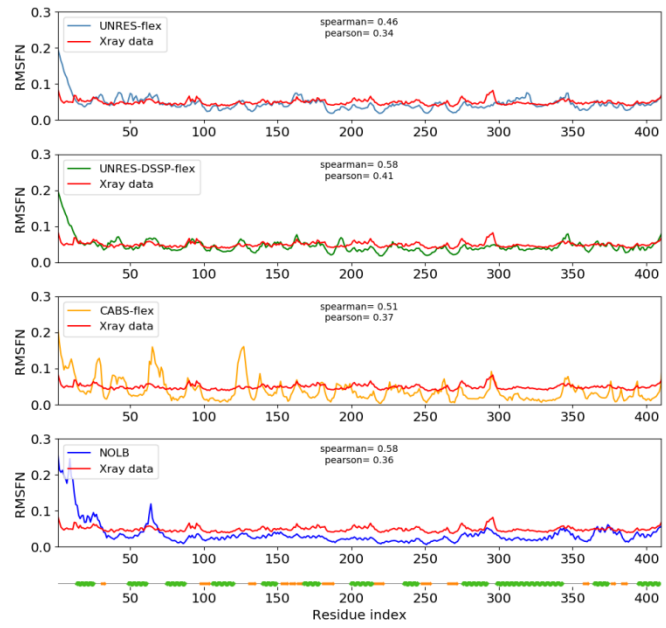

**Figure S2.** Normalized fluctuation profiles (RMSFN, dimensionless) calculated from NMR ensembles or X-ray B-factors (red line) and the corresponding profile predicted by UNRES-flex (light-blue line), UNRES-DSSP-flex (green line), CABS-flex (yellow line), and NOLB (blue line). Except for NOLB, the fluctuation profiles are averaged over three simulations. The Pearson ( $r_p$ ) and Spearman ( $r_s$ ) coefficients for the correlation between the experimental and predicted profiles are shown in each panel. The solid orange and wave green lines below the abscissa of each panel indicate the  $\beta$ -sheet and  $\alpha$ -helical structure, respectively. The analyses were carried out for full structures.

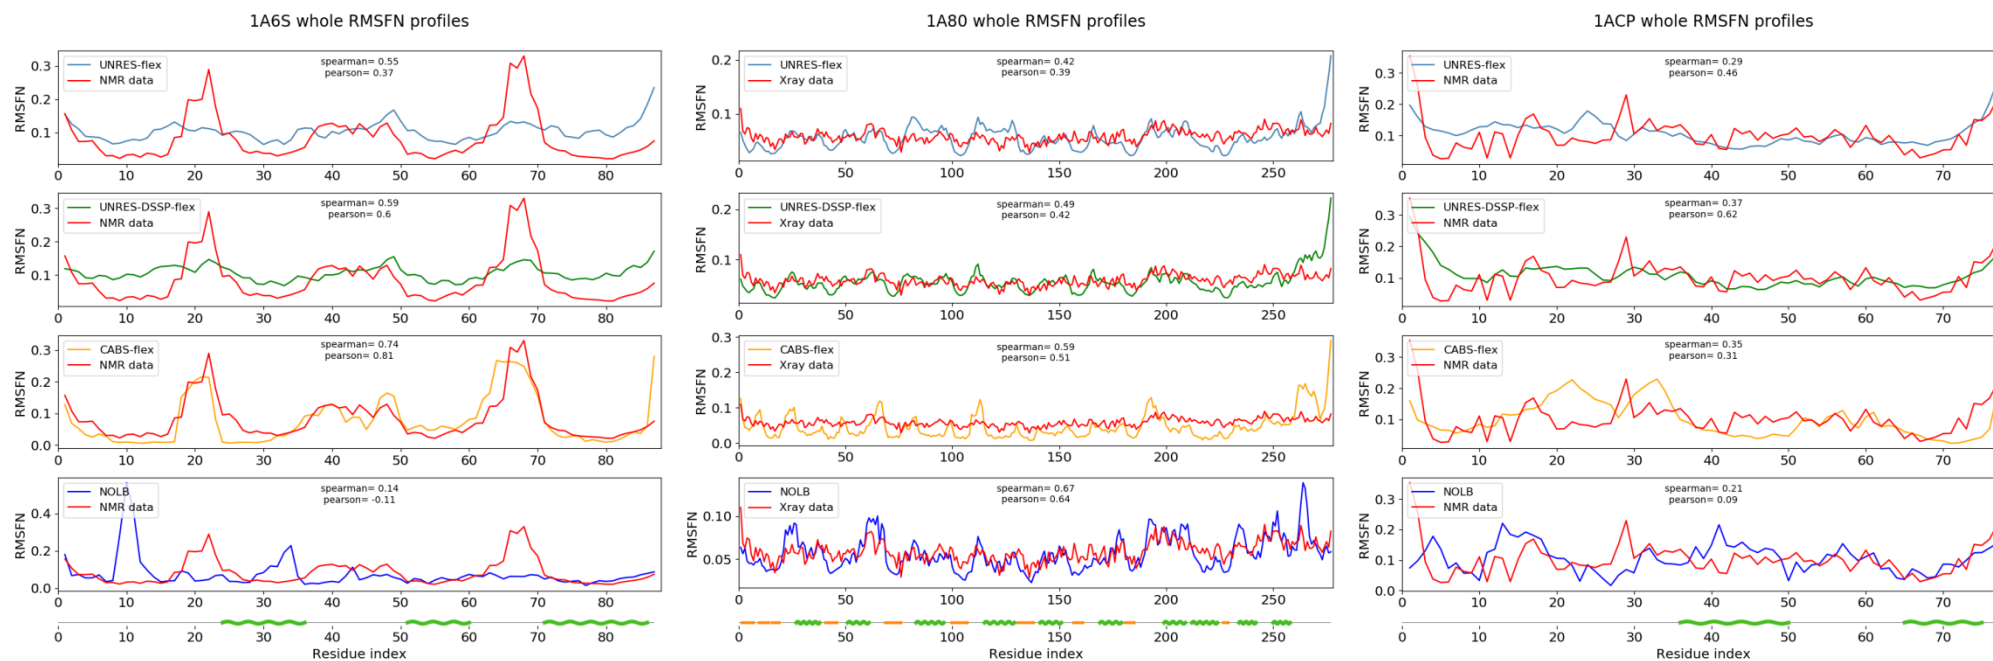



1ADG whole RMSFN profiles

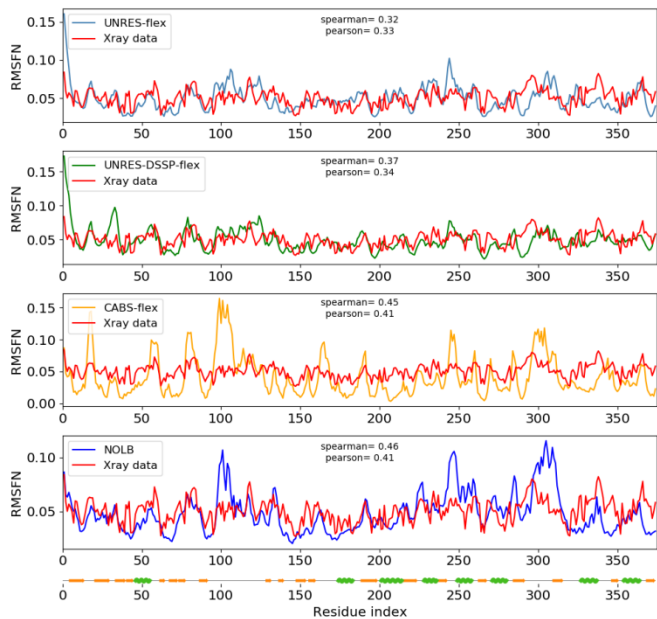

1AH9 whole RMSFN profiles

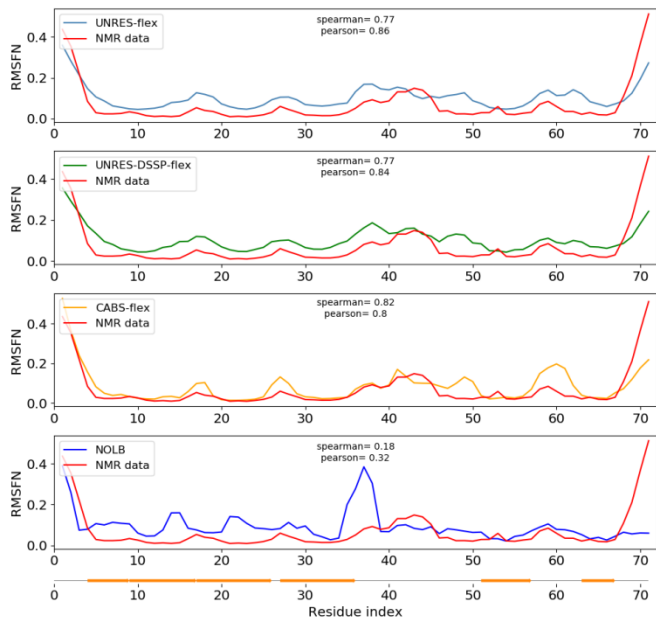

1AKY whole RMSFN profiles

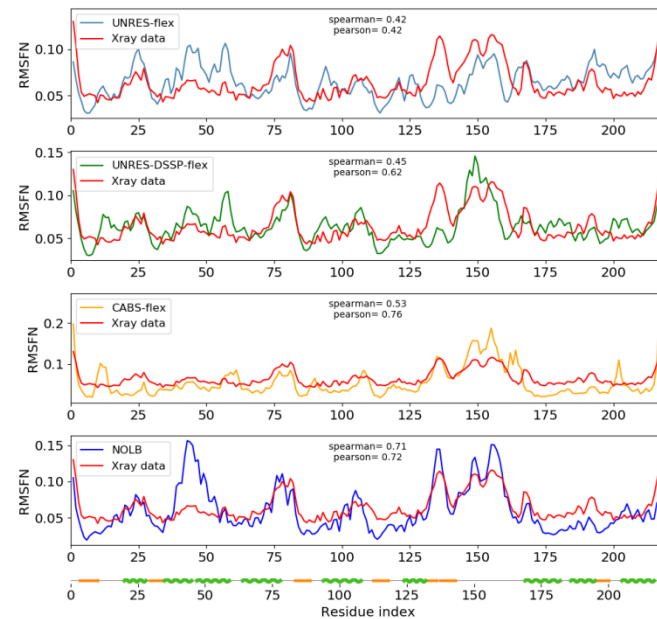

1ALA whole RMSFN profiles

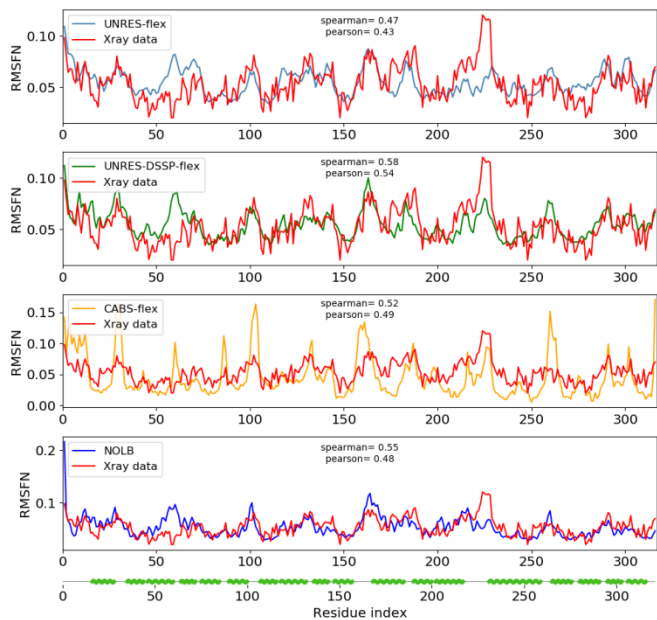

1AUM whole RMSFN profiles

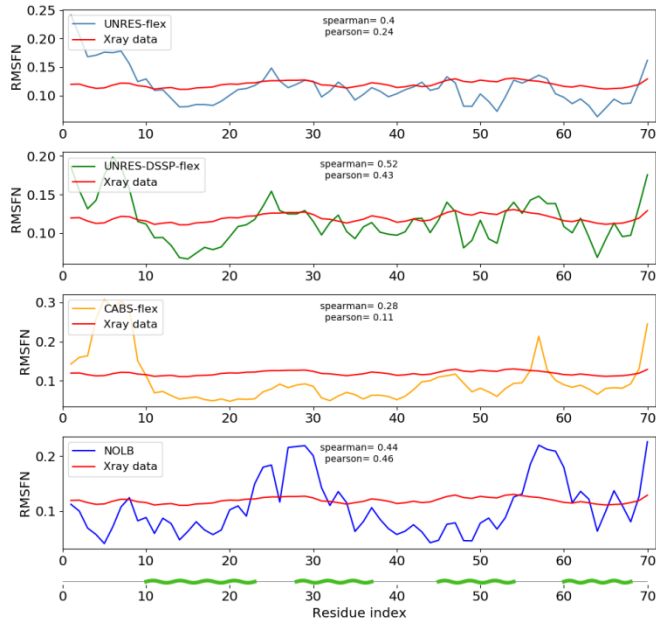

1BAL whole RMSFN profiles

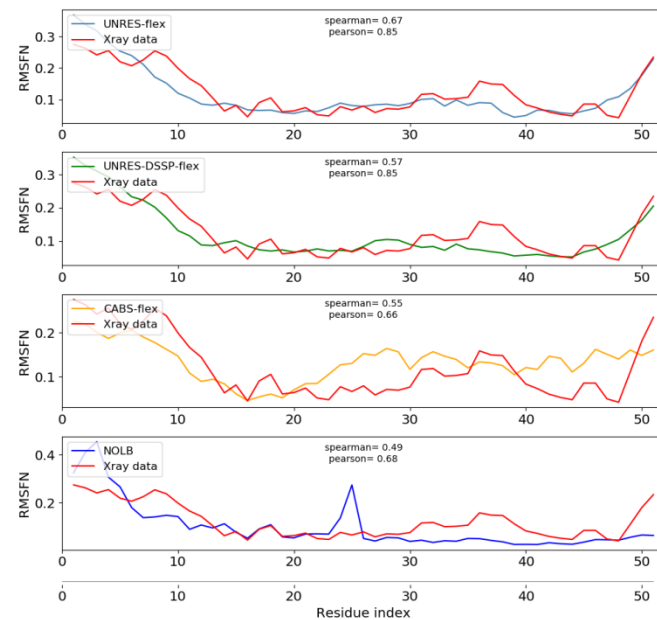

1BK2 whole RMSFN profiles

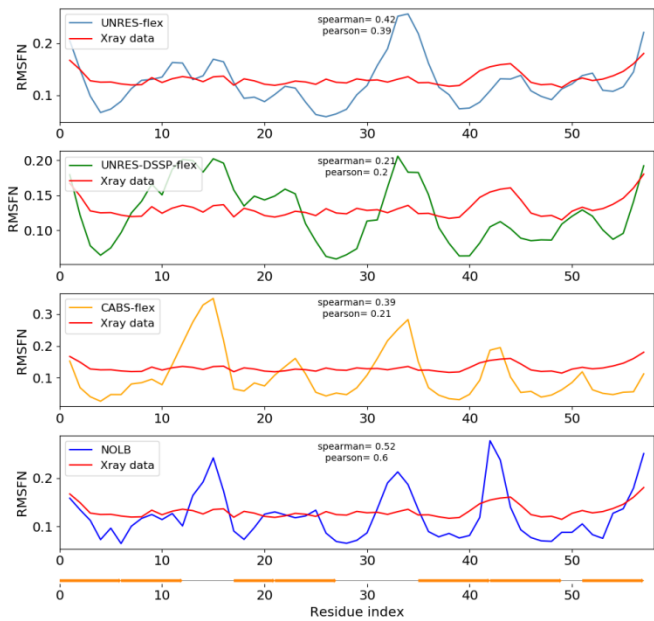

1CFJ whole RMSFN profiles

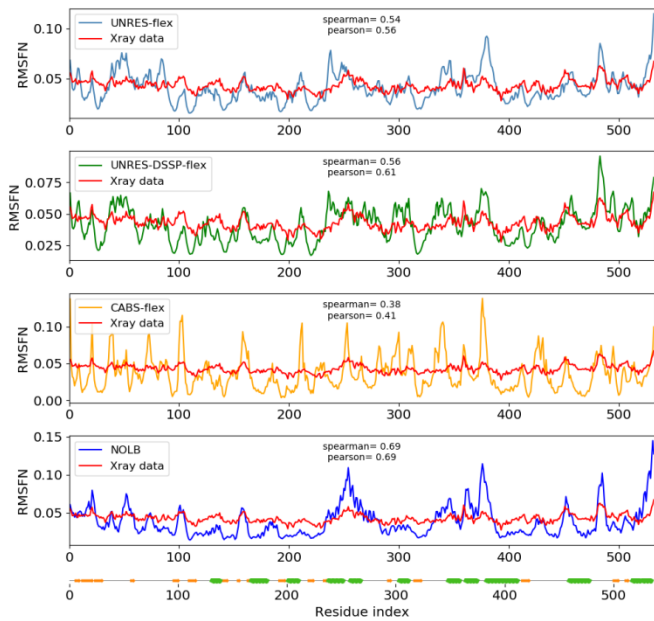

1CLB whole RMSFN profiles

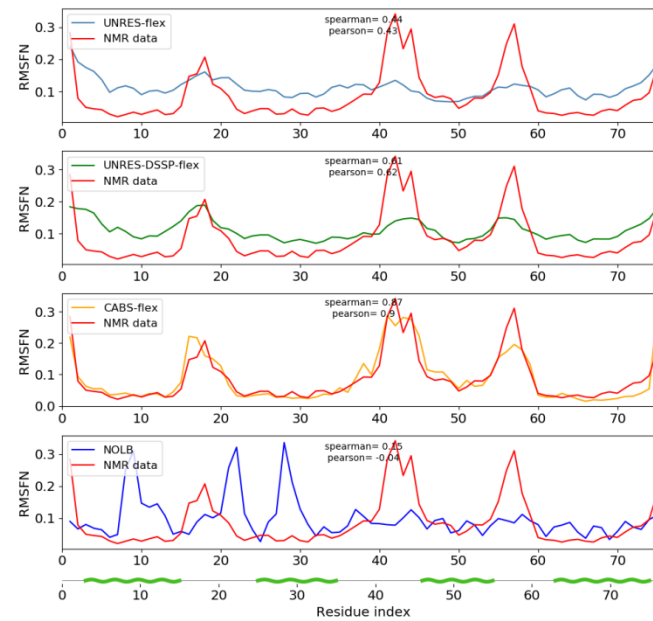

1CSP whole RMSFN profiles

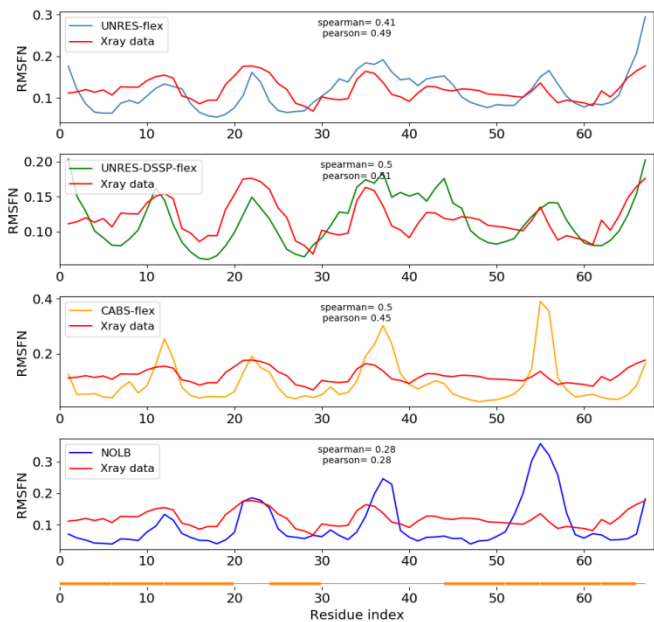

1CTF whole RMSFN profiles

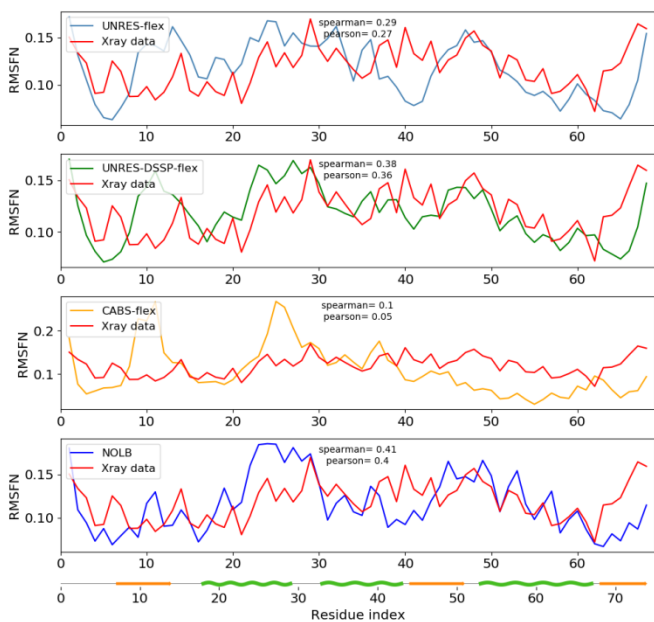

1E0G whole RMSFN profiles

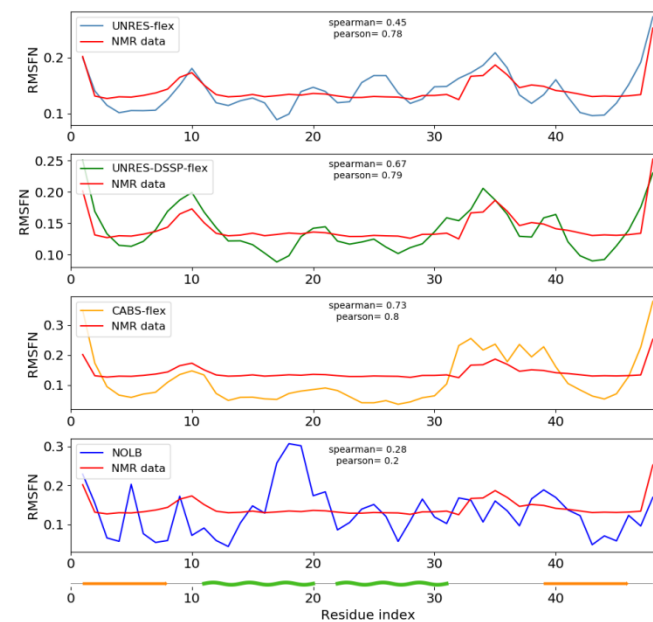

1ED7 whole RMSFN profiles

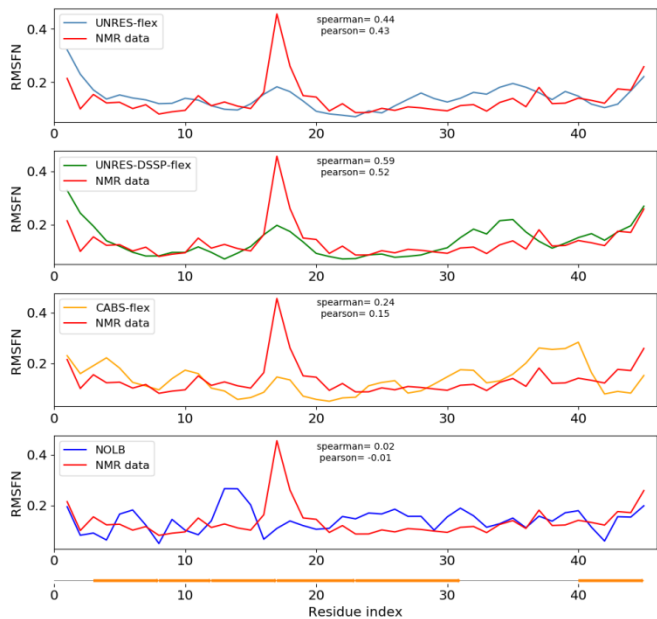

1EM7 whole RMSFN profiles

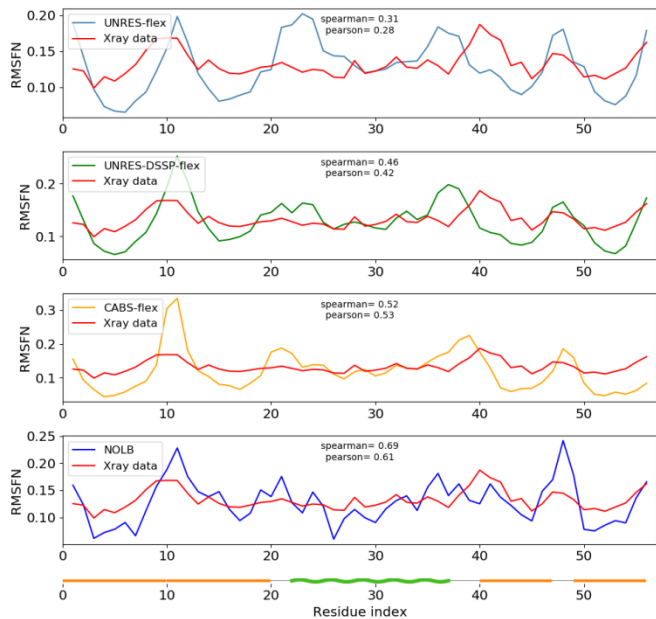

1ENH whole RMSFN profiles

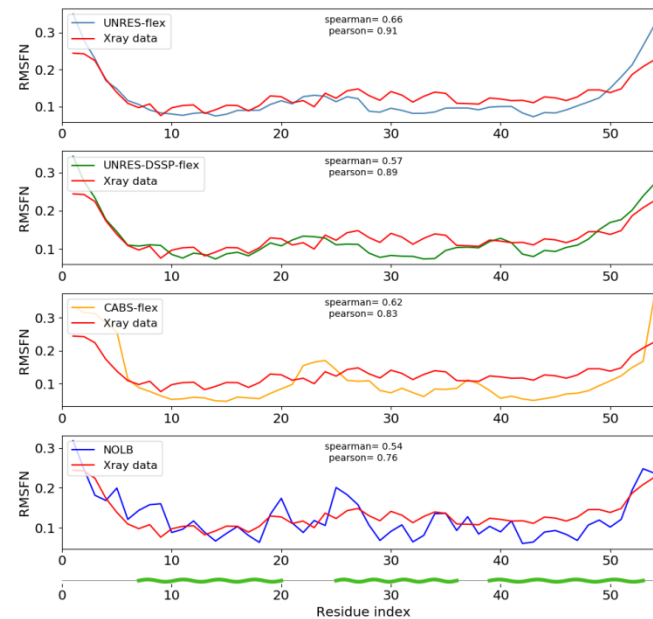

1EO0 whole RMSFN profiles

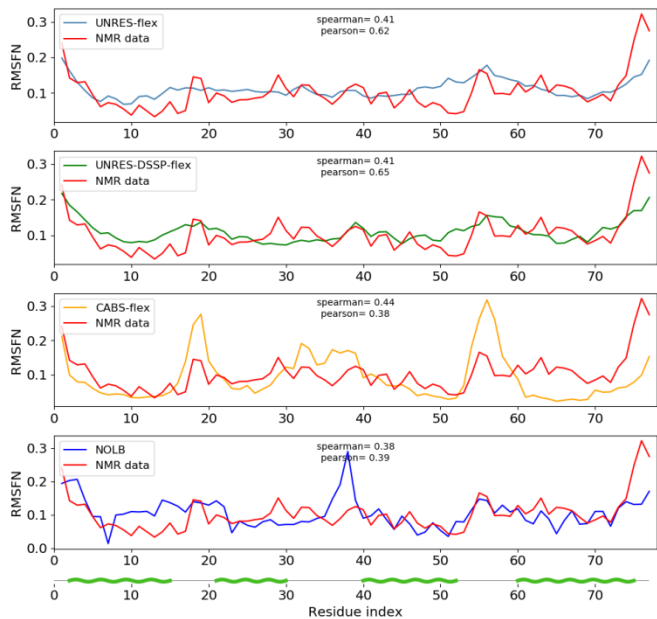

1FEX whole RMSFN profiles

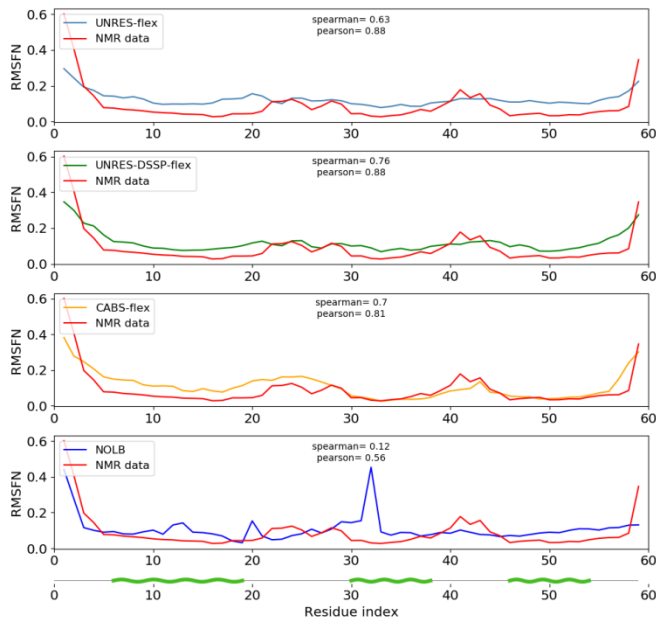

1G6E whole RMSFN profiles

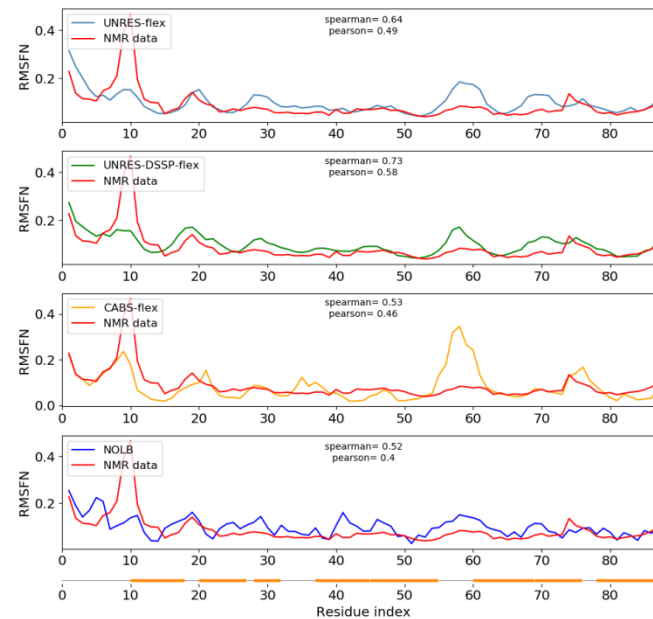

1GAB whole RMSFN profiles

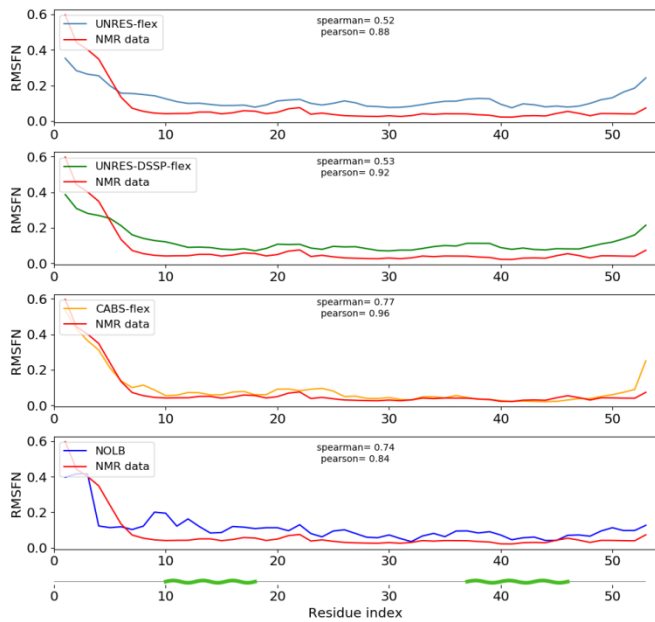

1GHH whole RMSFN profiles

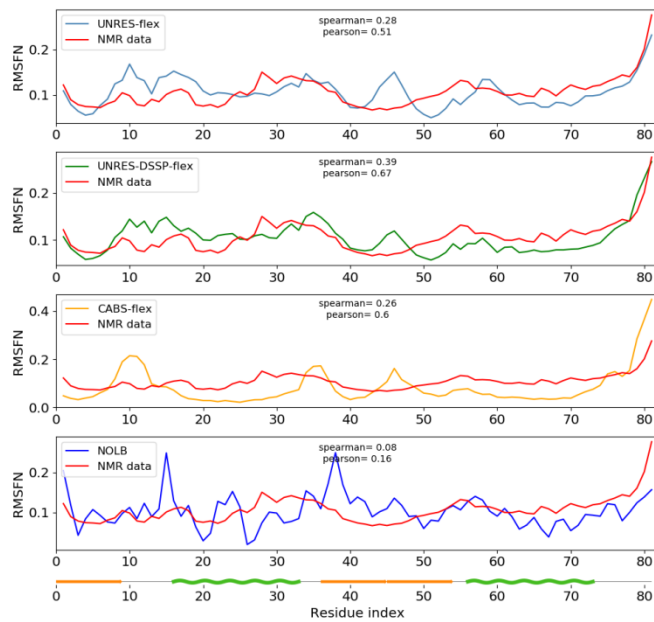

1HNS whole RMSFN profiles

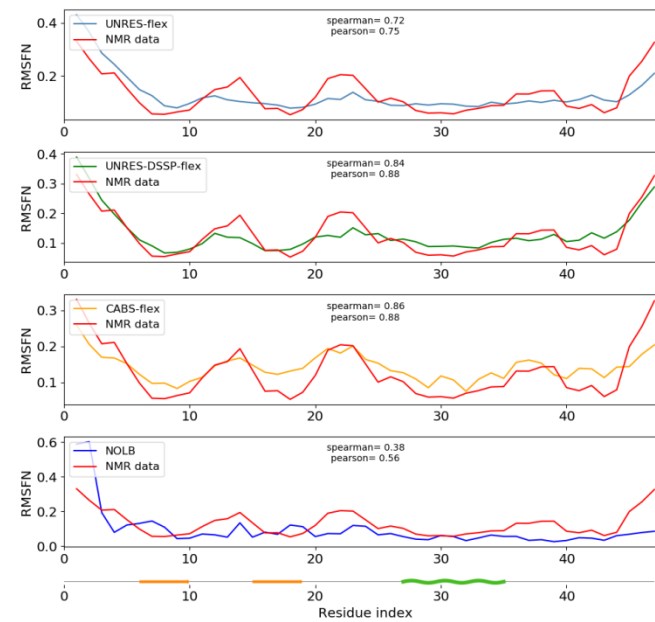

1HRF whole RMSFN profiles

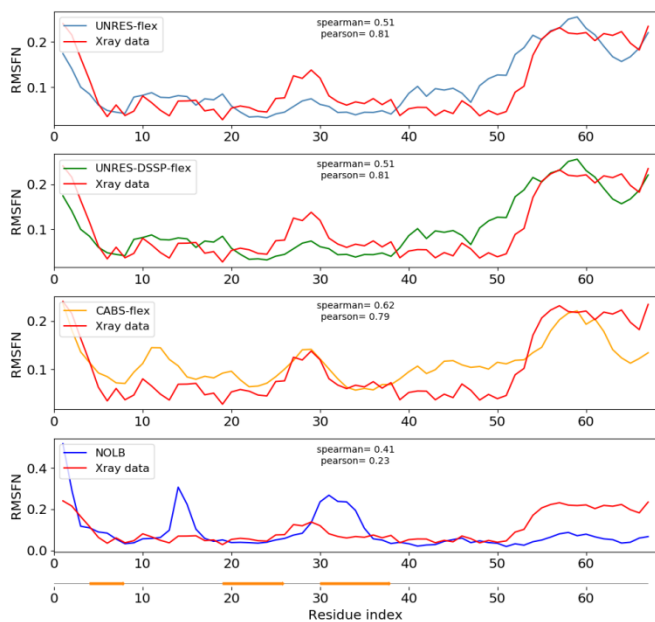

1HYH whole RMSFN profiles

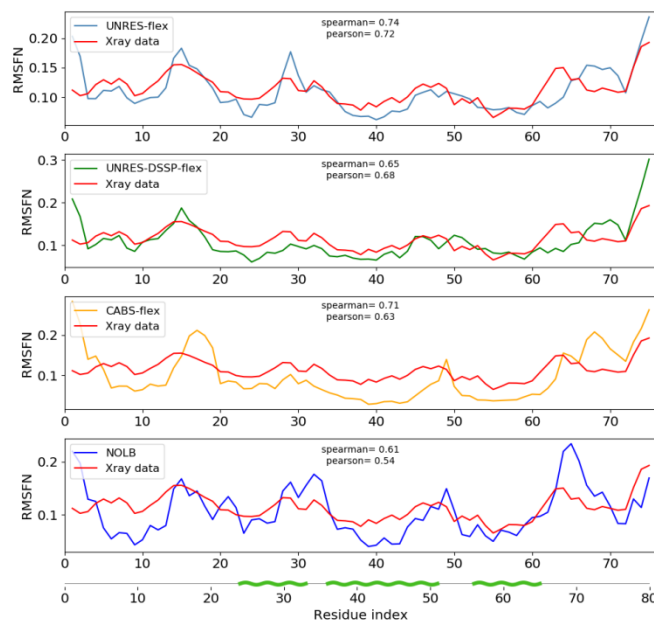

1HYW whole RMSFN profiles

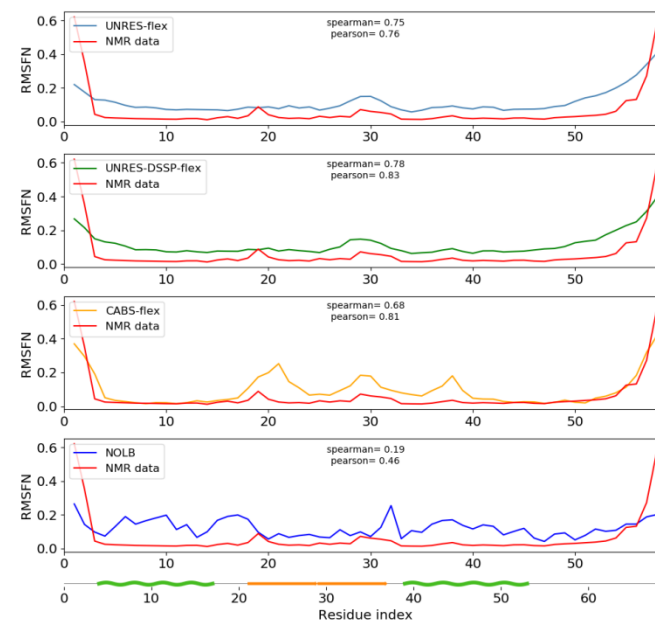

1IG5 whole RMSFN profiles

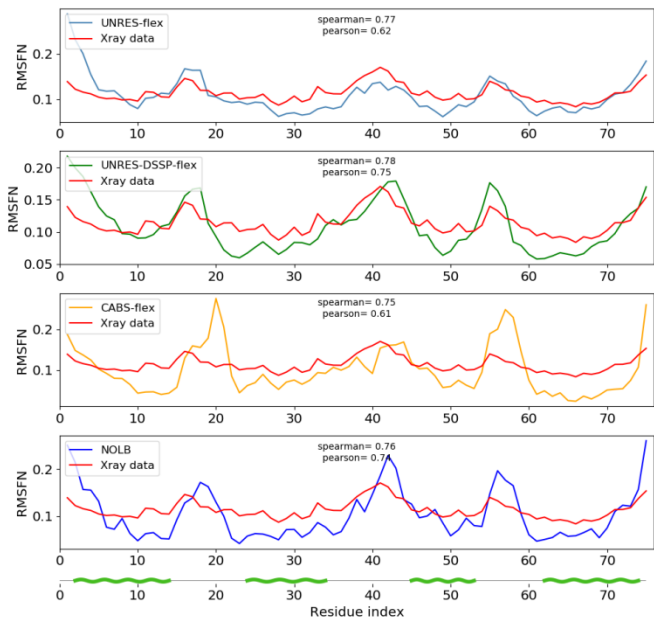

1IQO whole RMSFN profiles

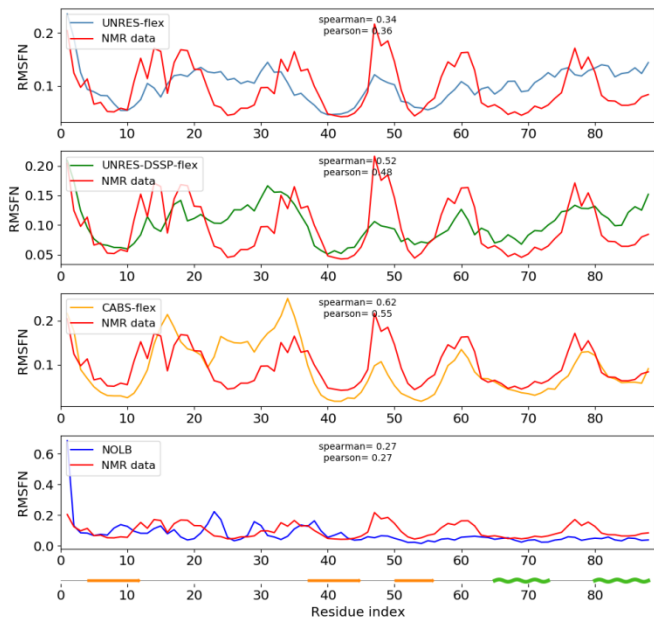

1IYR whole RMSFN profiles

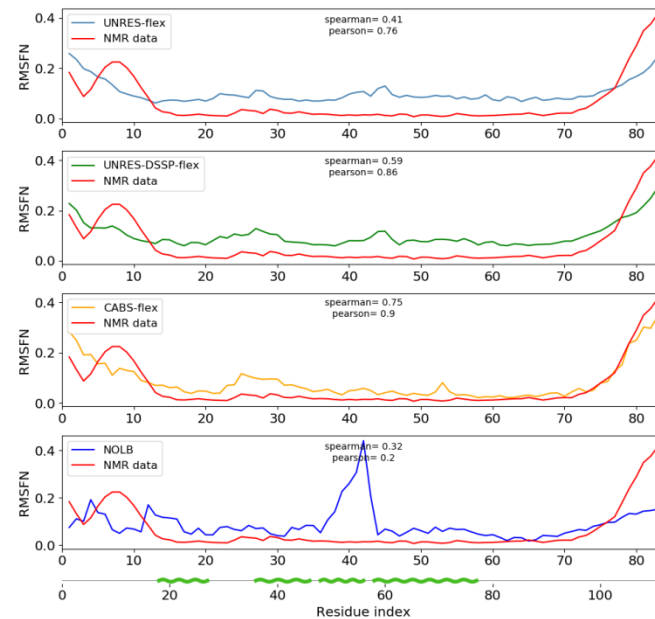

1IYV whole RMSFN profiles

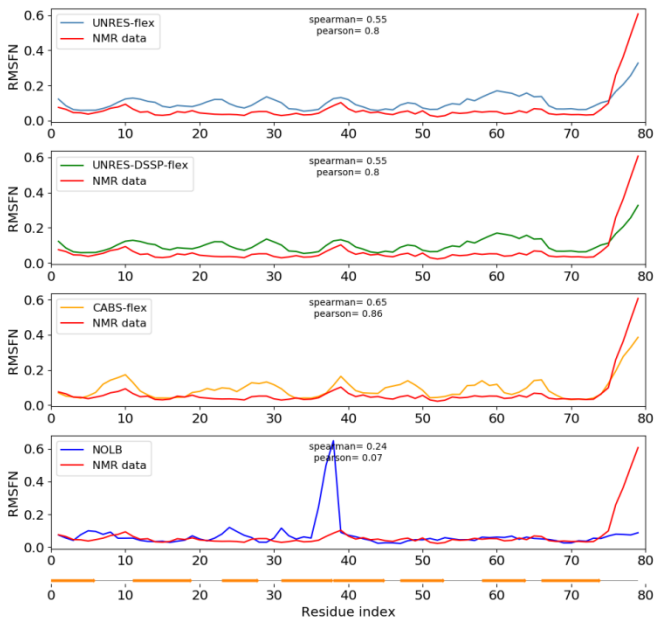

1J7O whole RMSFN profiles

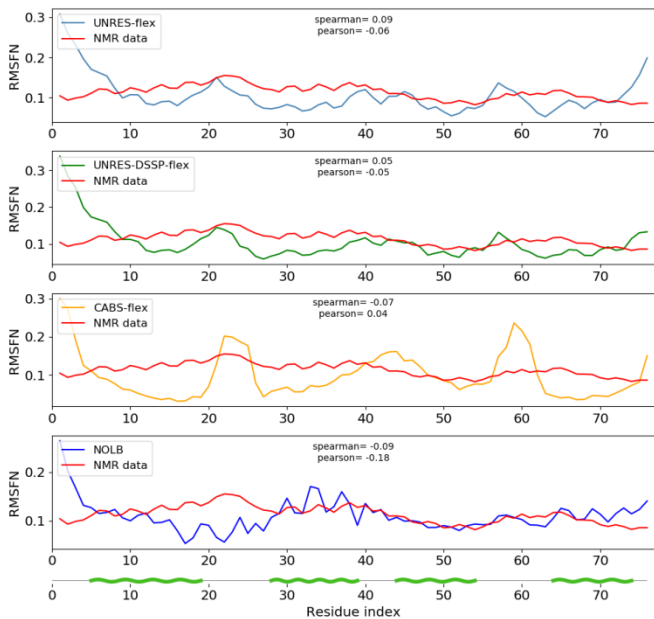

1K8B whole RMSFN profiles

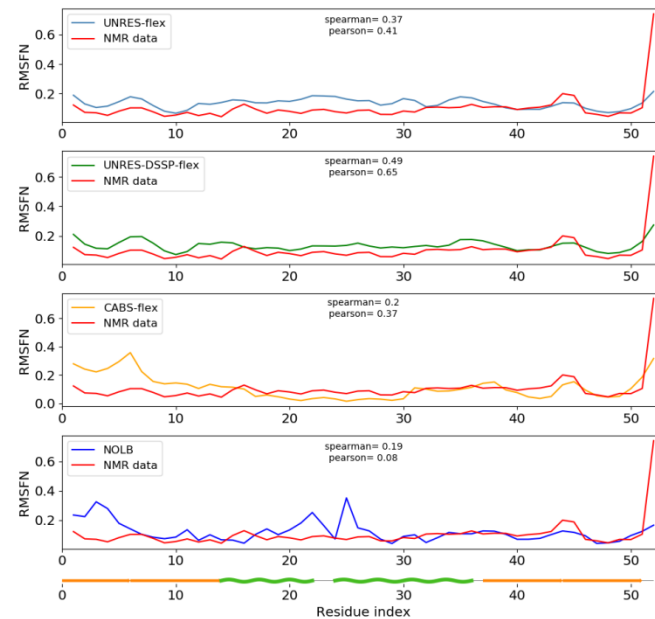

1K40 whole RMSFN profiles

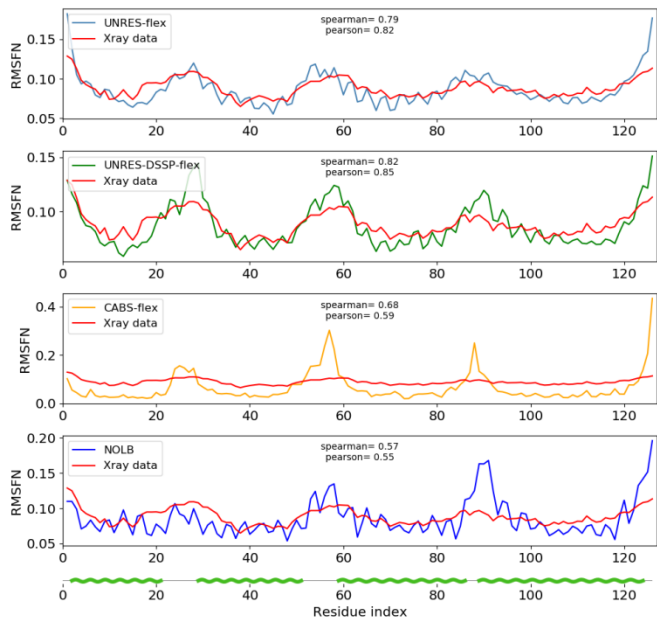

1L2Y whole RMSFN profiles

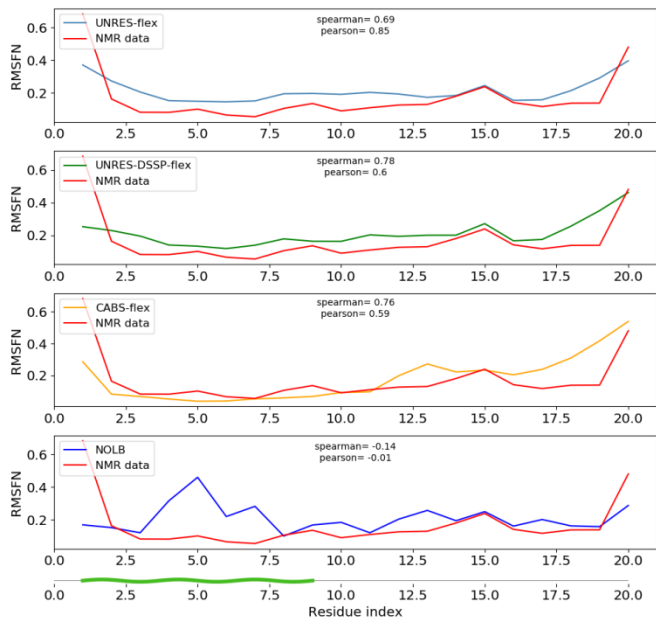

1LEB whole RMSFN profiles

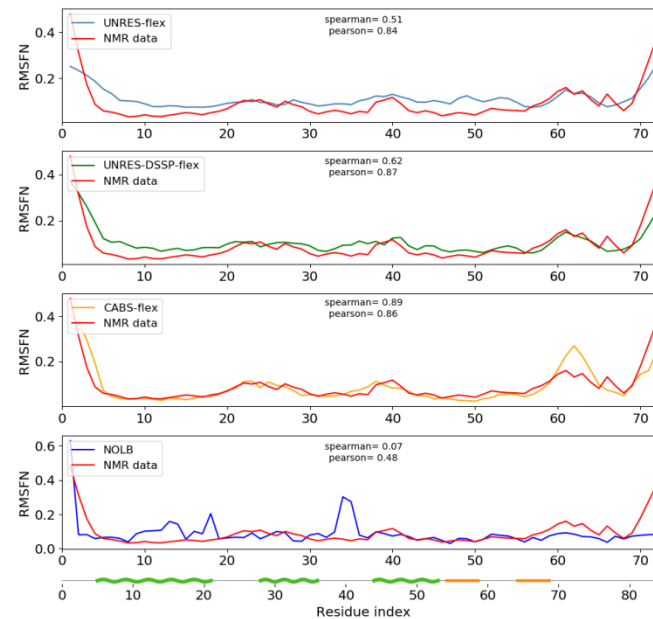

1LQ7 whole RMSFN profiles

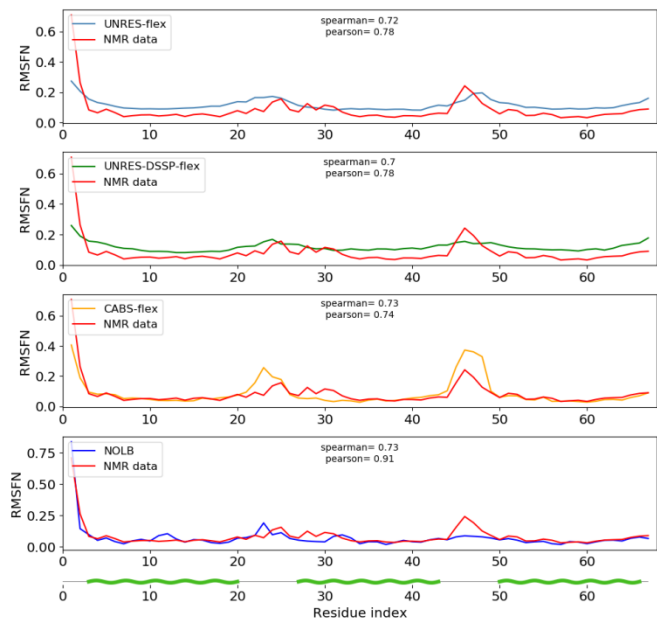

1MJC whole RMSFN profiles

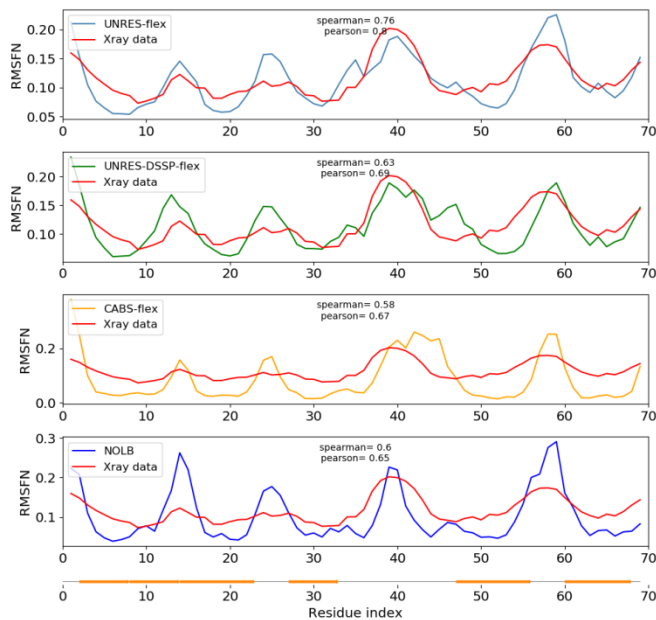

1NOA whole RMSFN profiles

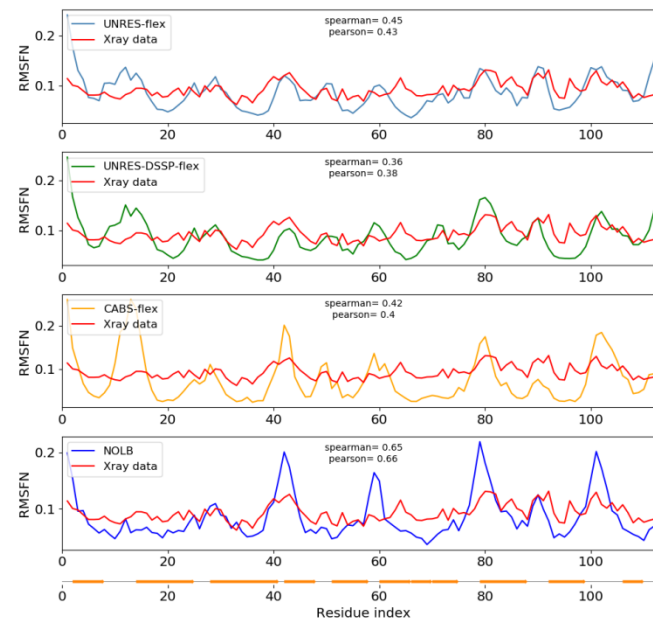

10GQ whole RMSFN profiles

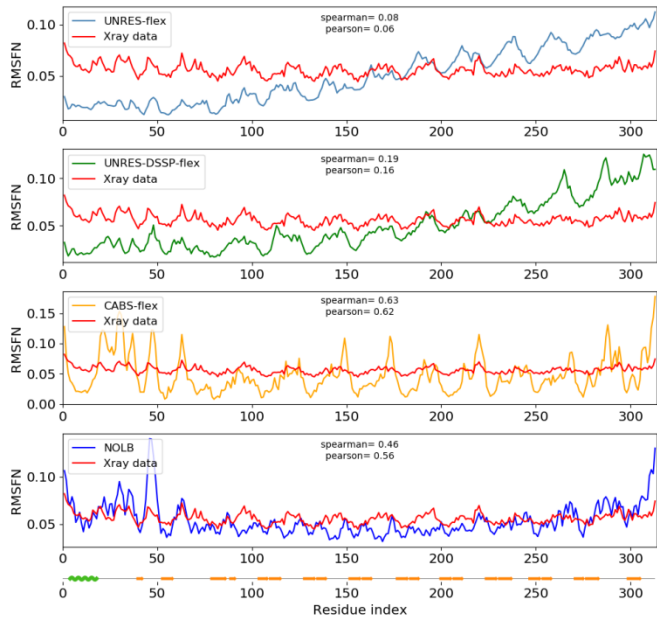

10IX whole RMSFN profiles

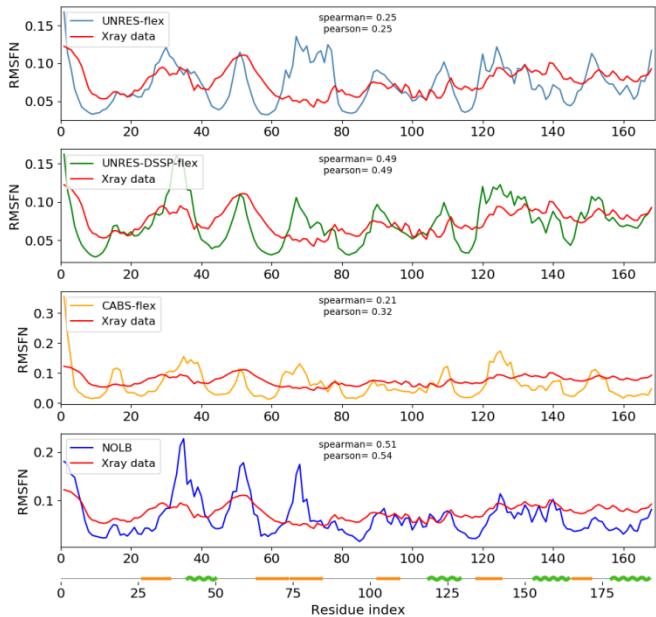

10PD whole RMSFN profiles

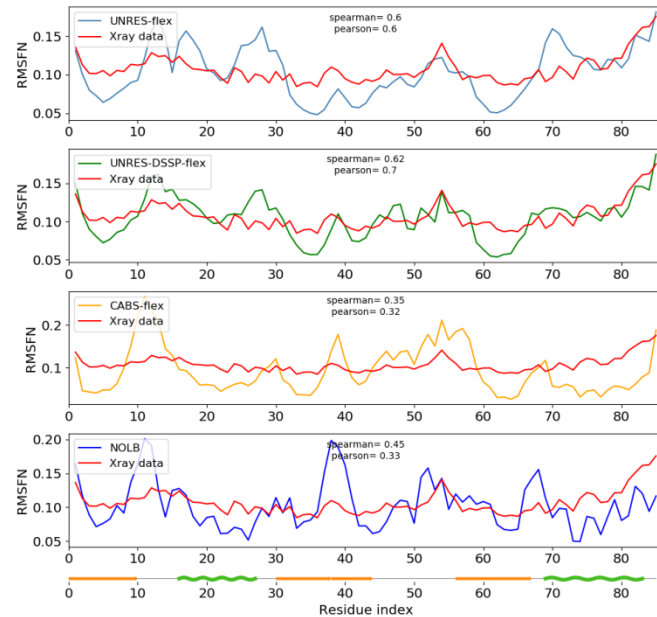

1P68 whole RMSFN profiles

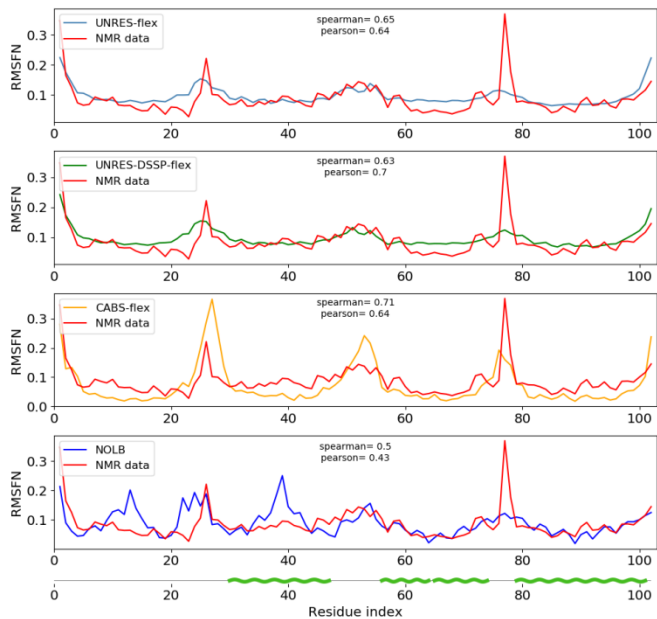

1PGA whole RMSFN profiles

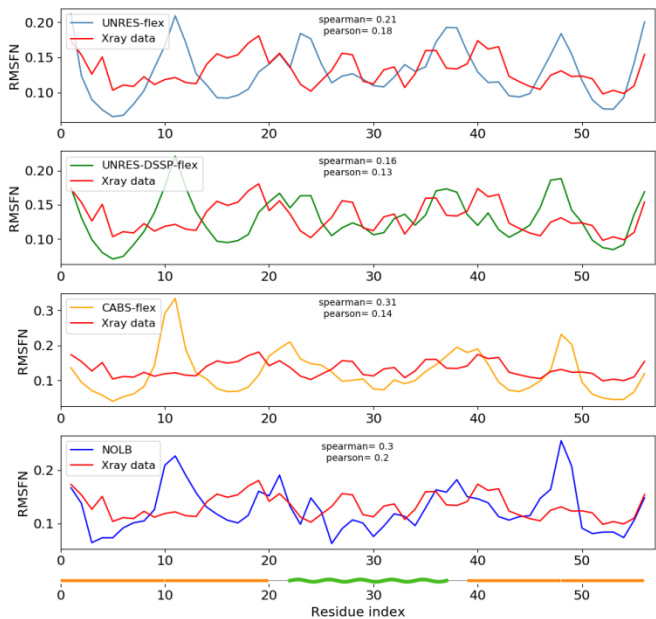

1PHT whole RMSFN profiles

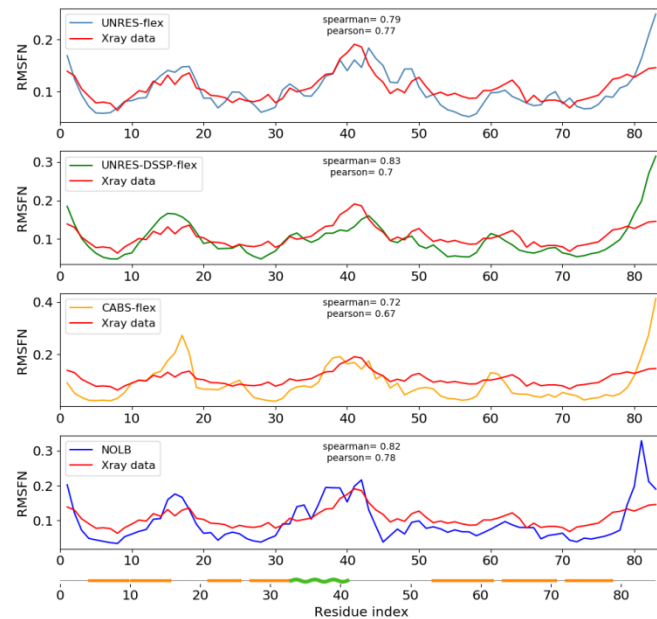

1POU whole RMSFN profiles

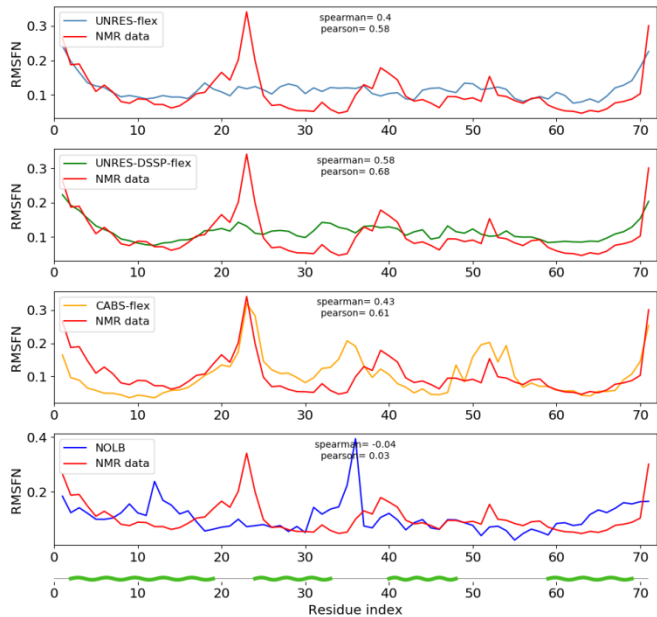

1PRV whole RMSFN profiles

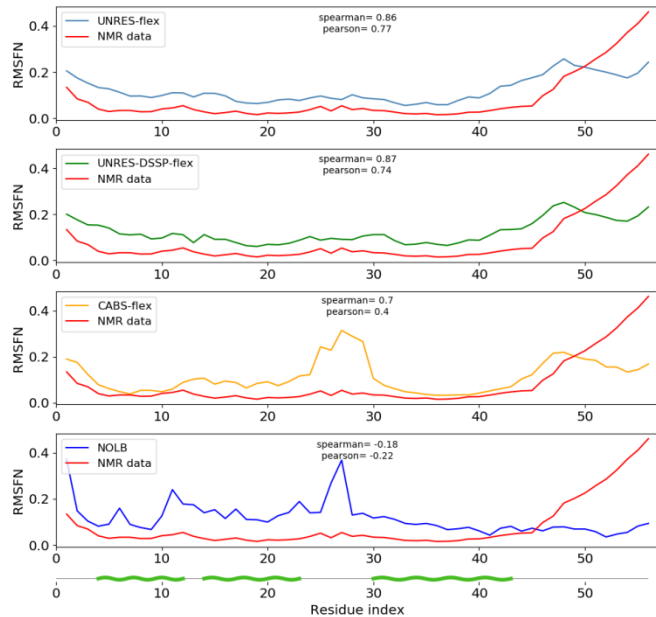

1PTF whole RMSFN profiles

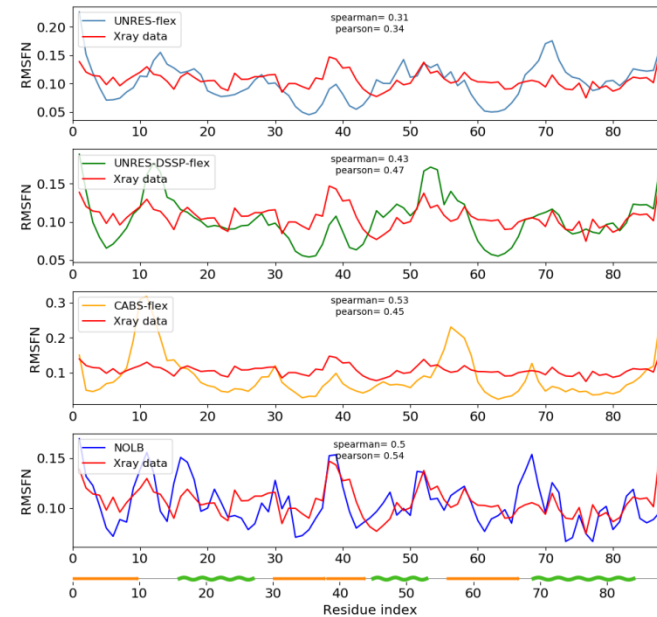

1QRE whole RMSFN profiles

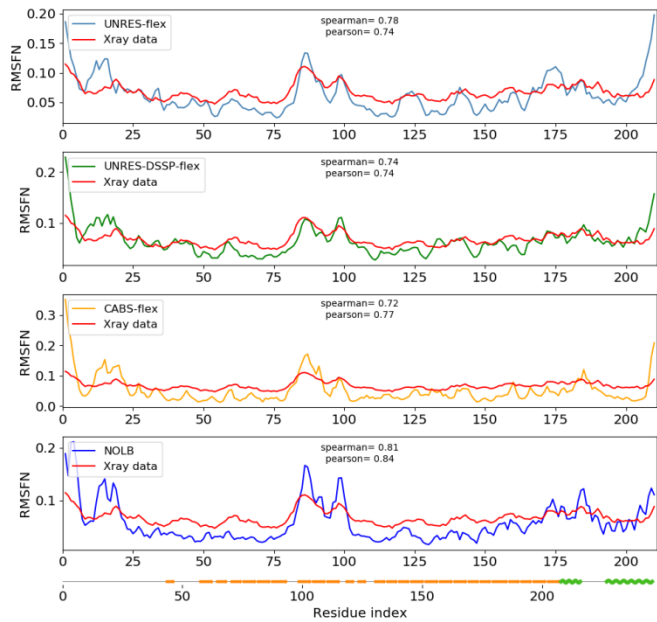

1RIJ whole RMSFN profiles

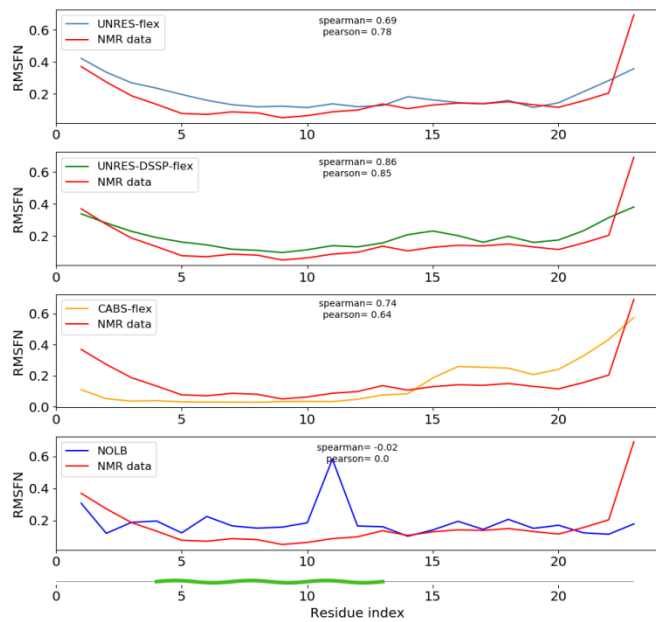

1ROP whole RMSFN profiles

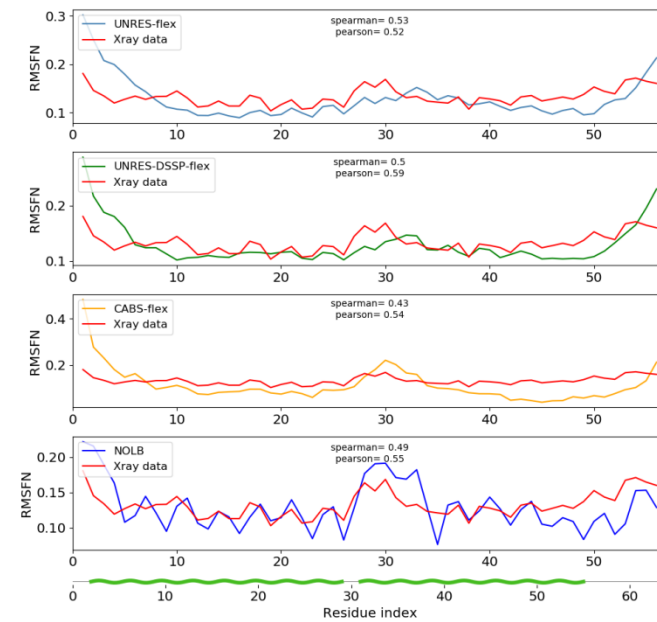



1RUW whole RMSFN profiles

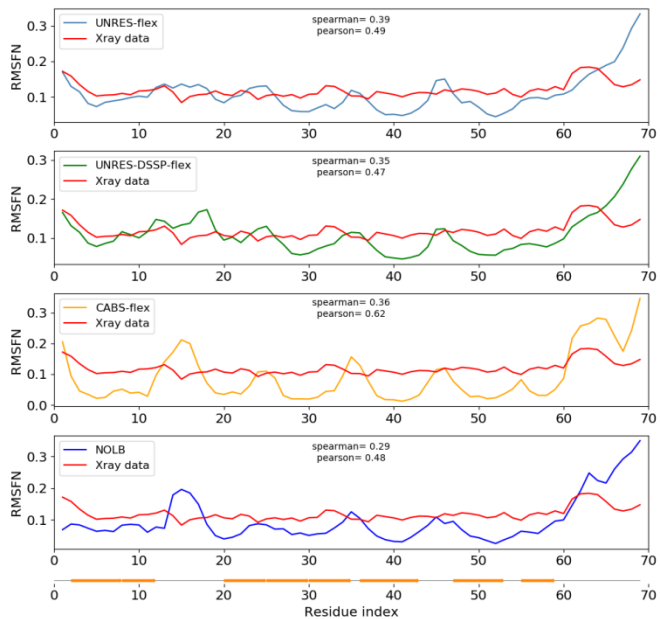

1STU whole RMSFN profiles

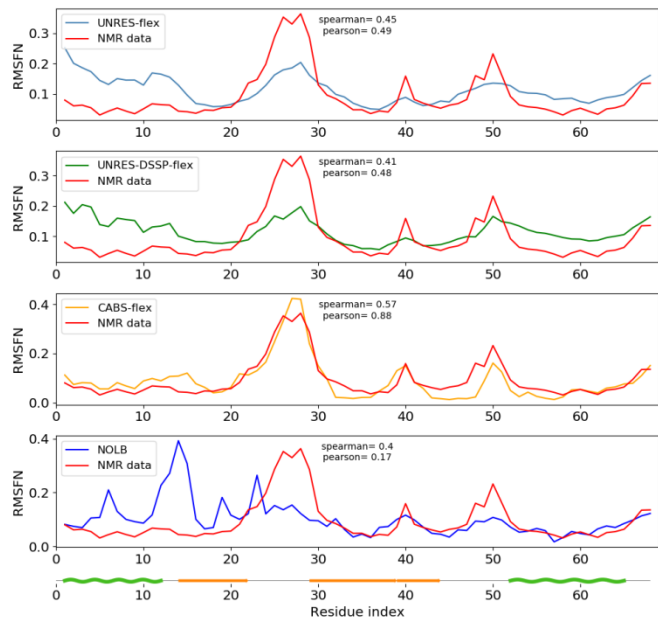

1TEN whole RMSFN profiles

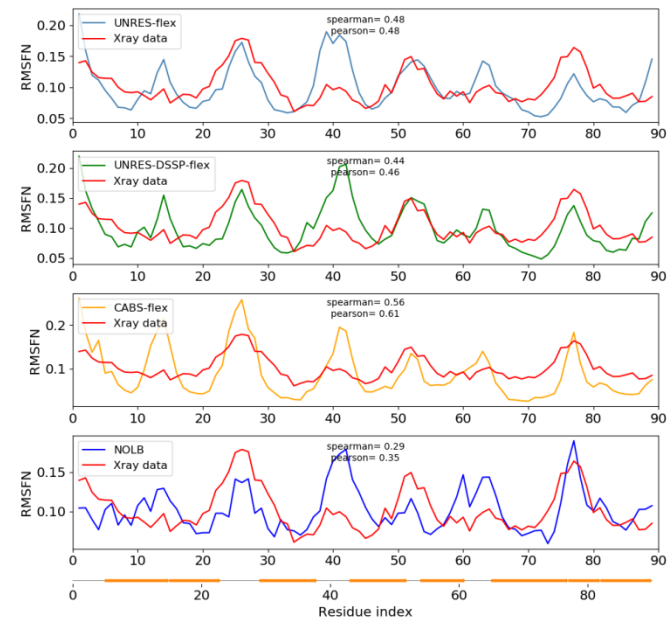

1THX whole RMSFN profiles

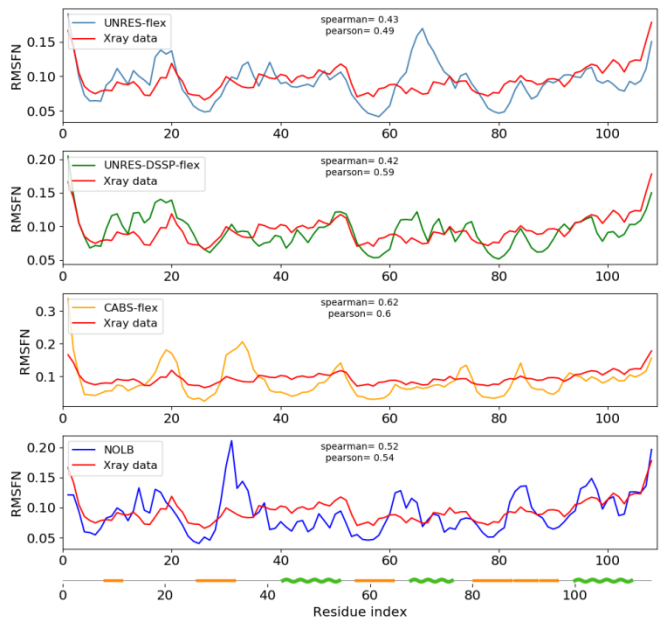

1TIG whole RMSFN profiles

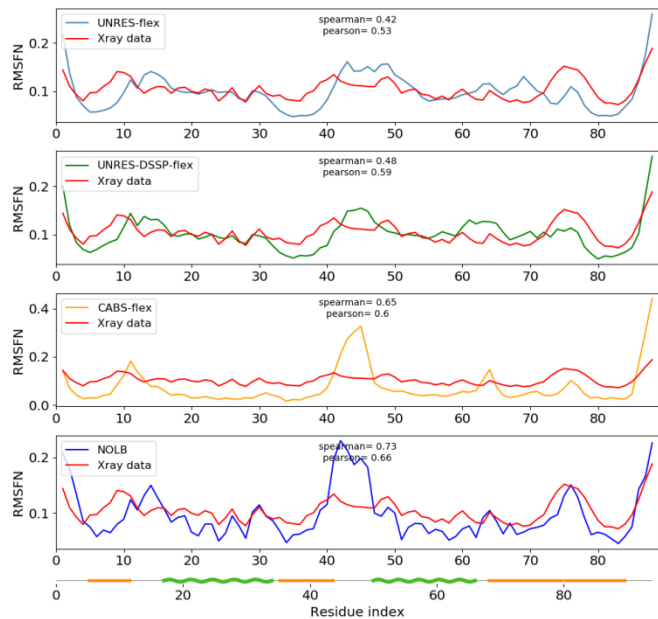

1TPN whole RMSFN profiles

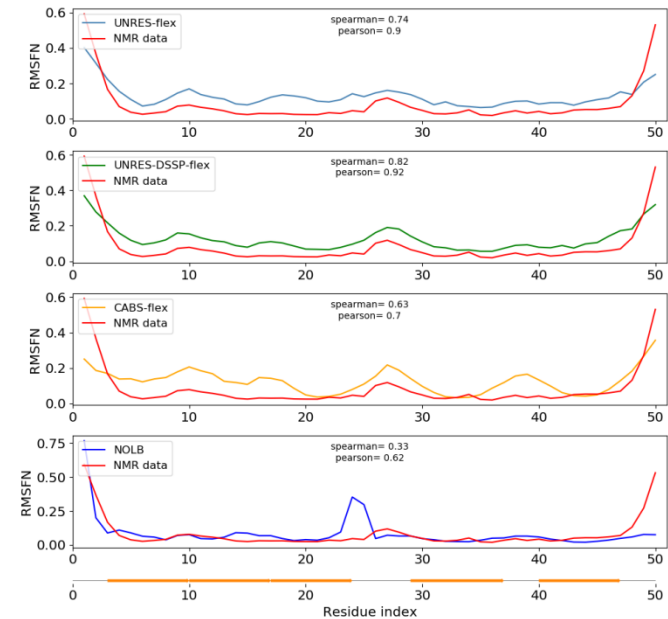

1UBQ whole RMSFN profiles

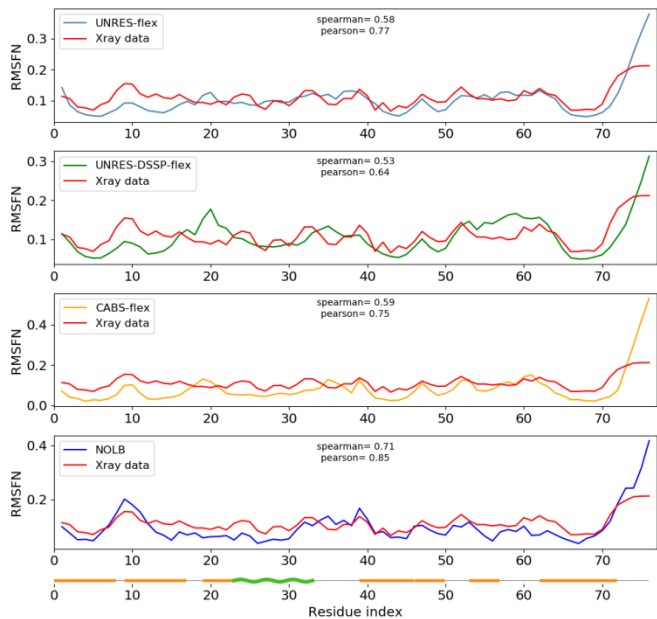

1VIG whole RMSFN profiles

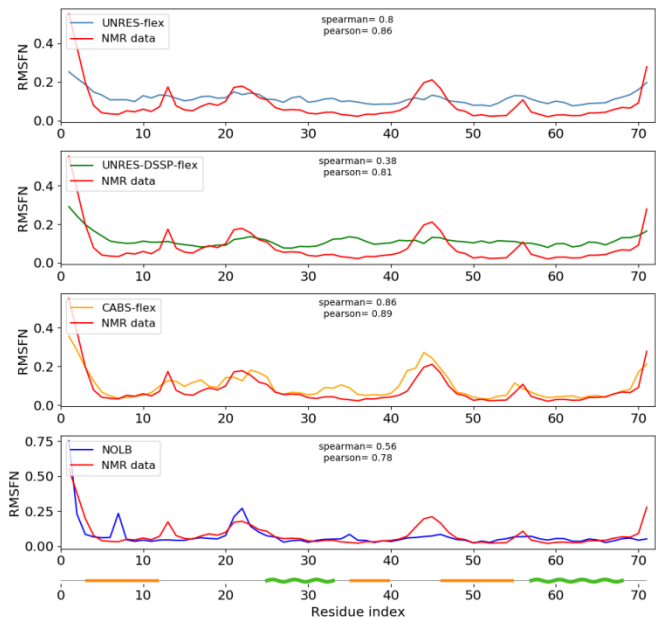

1WIU whole RMSFN profiles

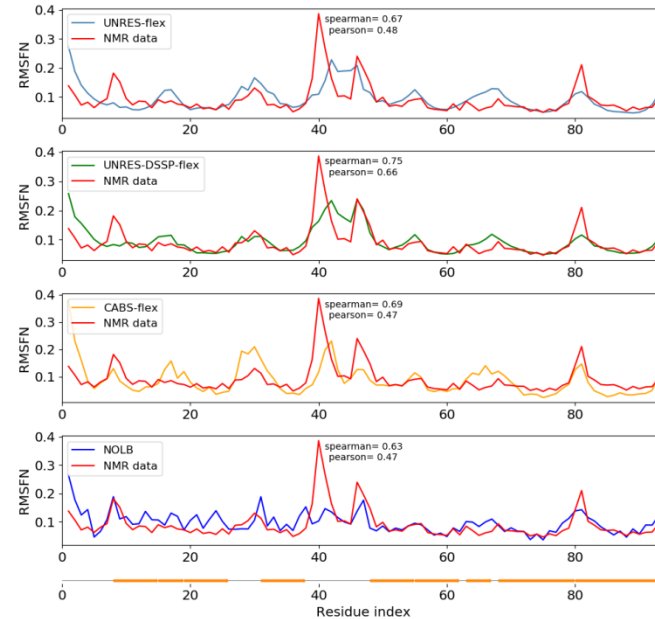

1WKT whole RMSFN profiles

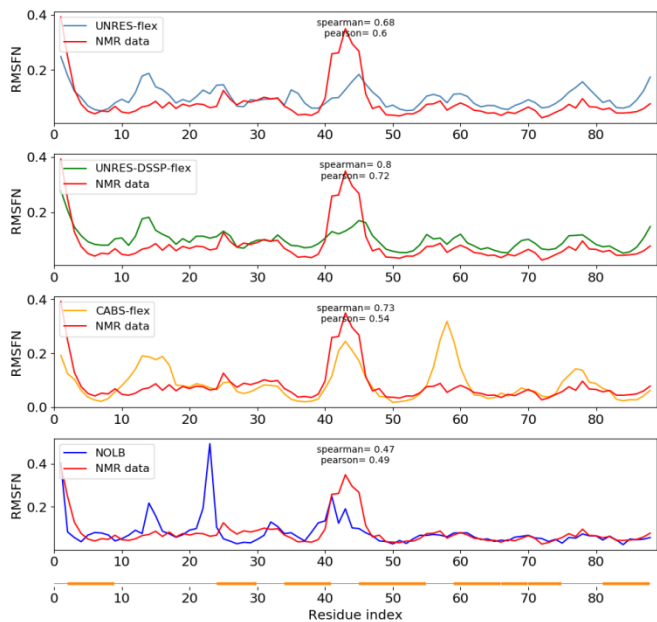

1XCD whole RMSFN profiles

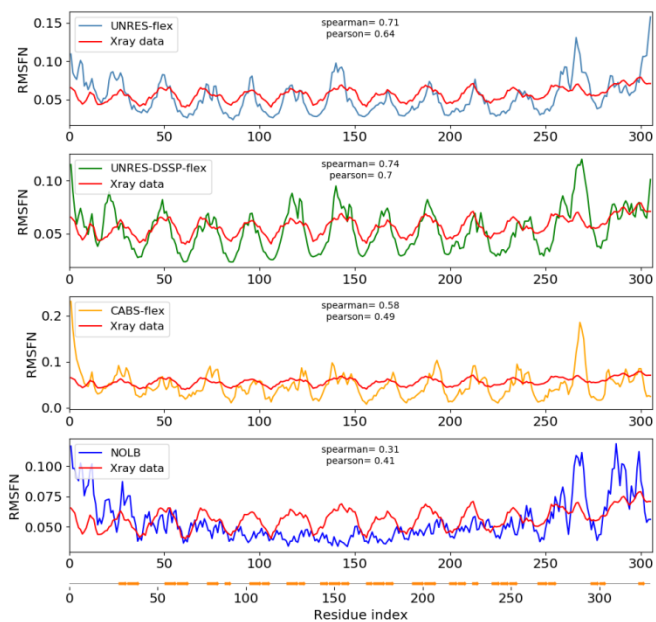

1YRF whole RMSFN profiles

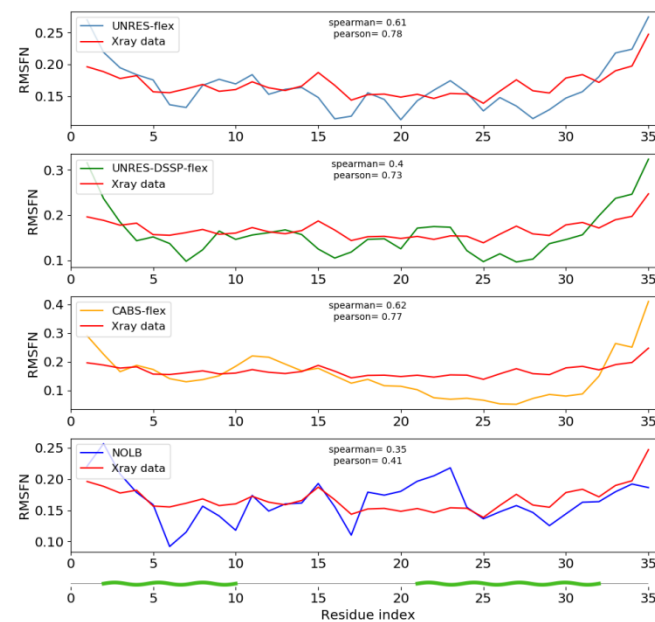

2ACY whole RMSFN profiles

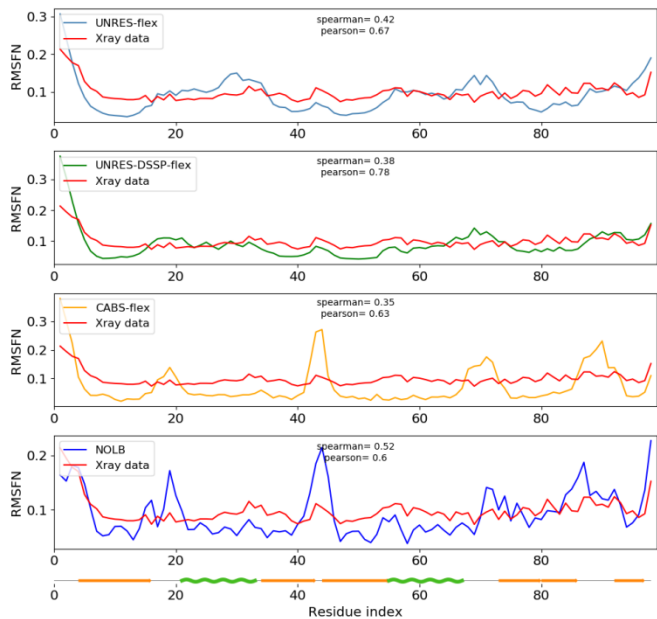

2BBY whole RMSFN profiles

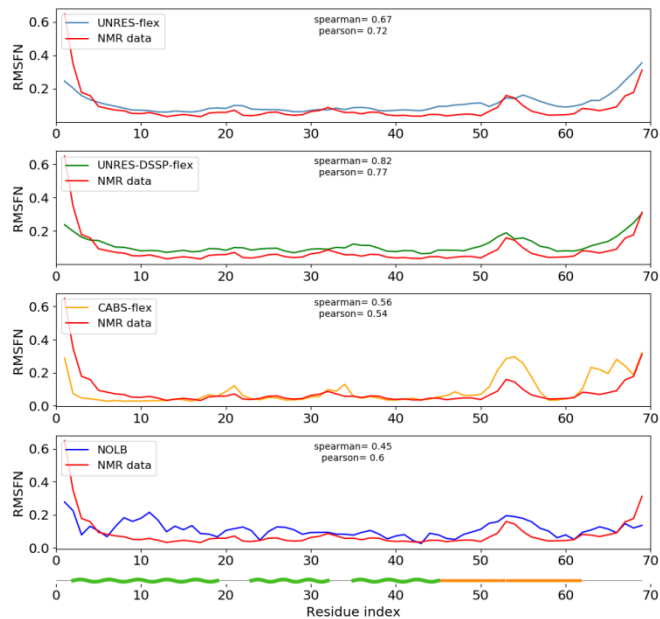

2BF9 whole RMSFN profiles

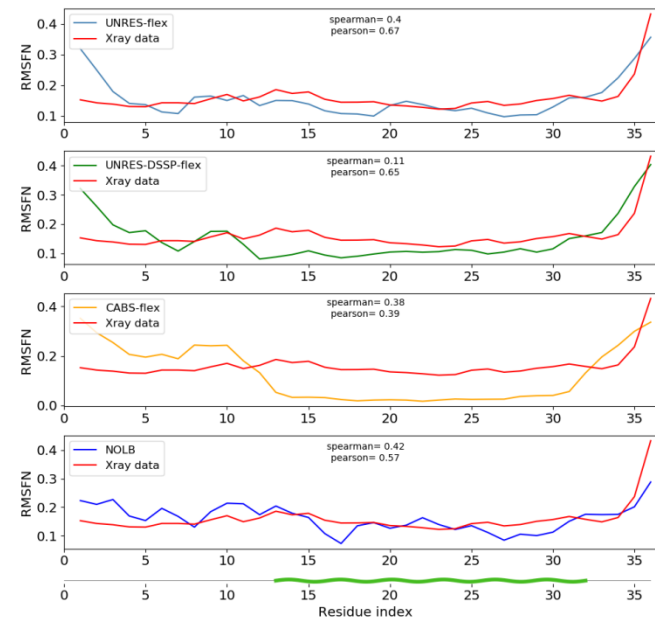

2CRB whole RMSFN profiles

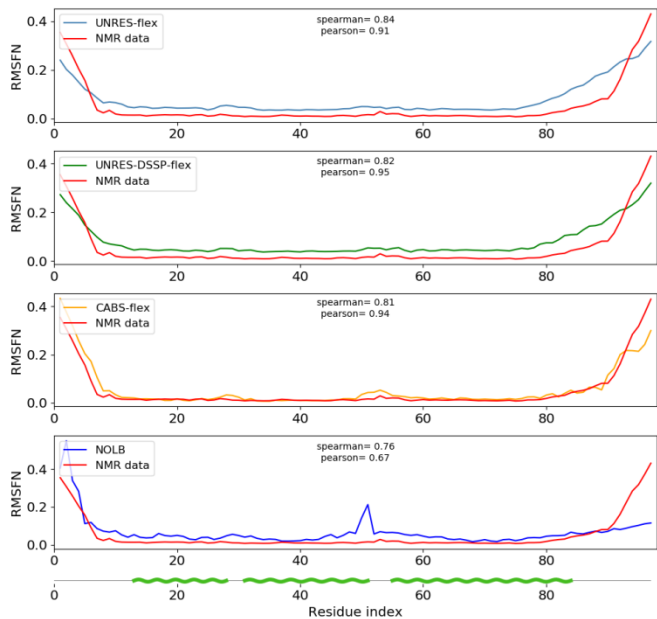

2E7N whole RMSFN profiles

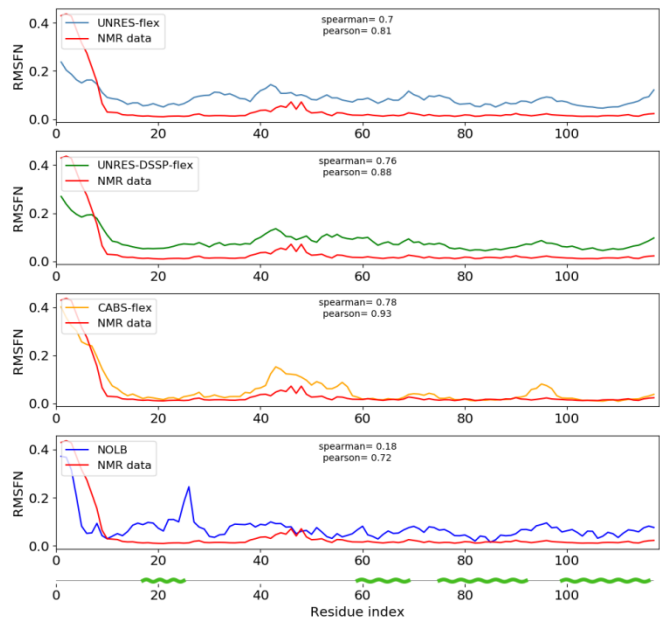

2FMR whole RMSFN profiles

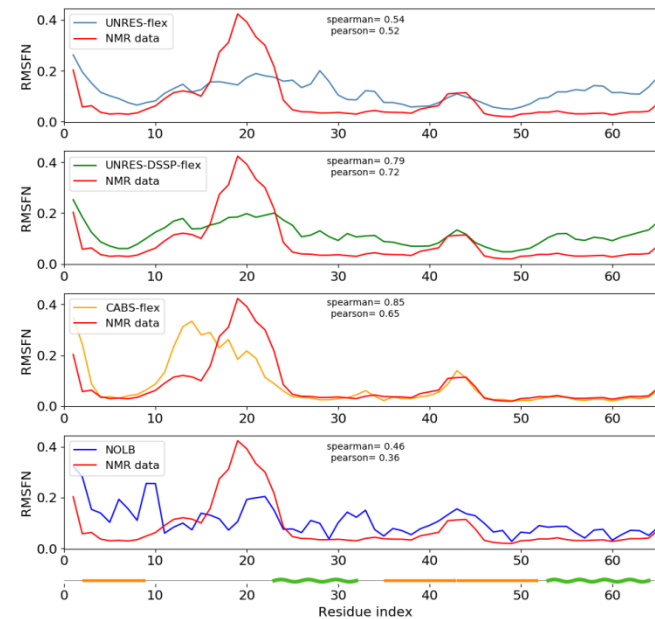

2HEP whole RMSFN profiles

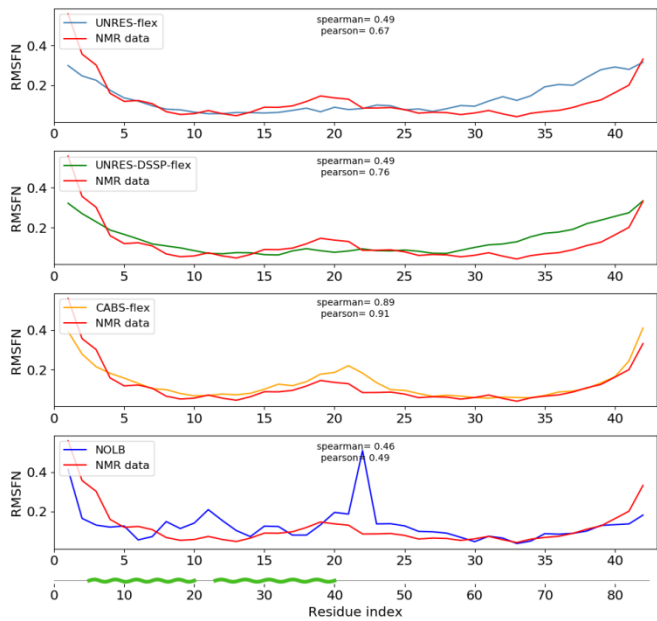

2HI3 whole RMSFN profiles

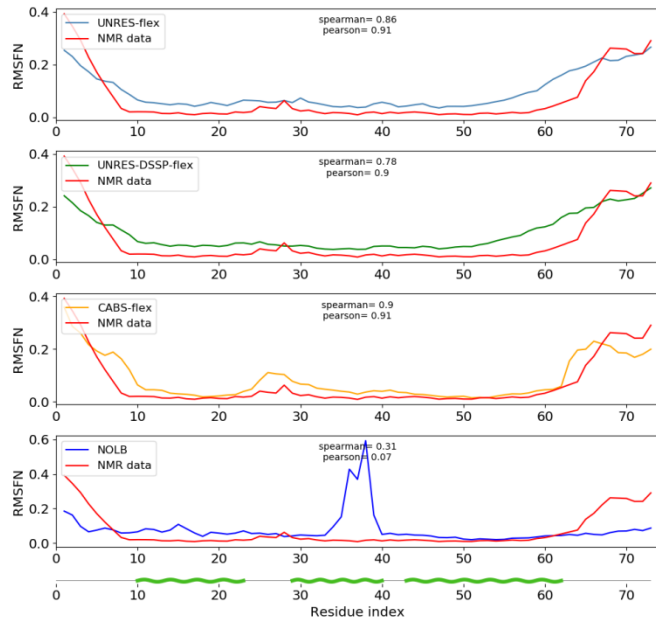

2K9G whole RMSFN profiles

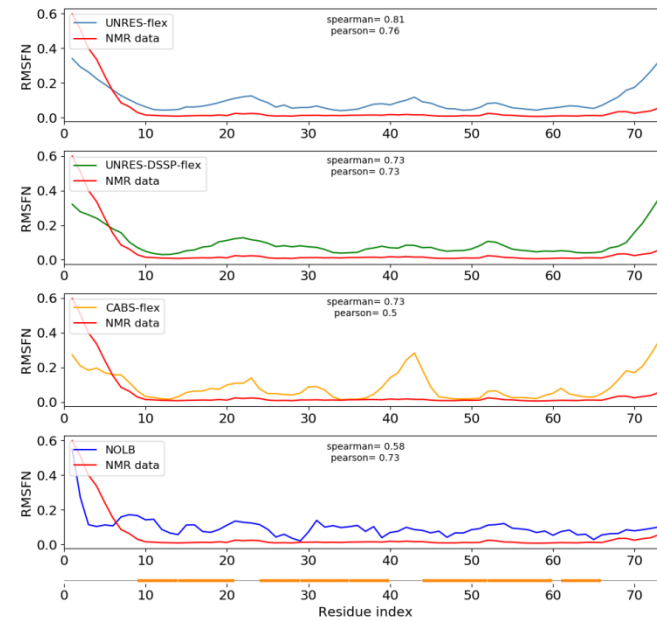

2KYW whole RMSFN profiles

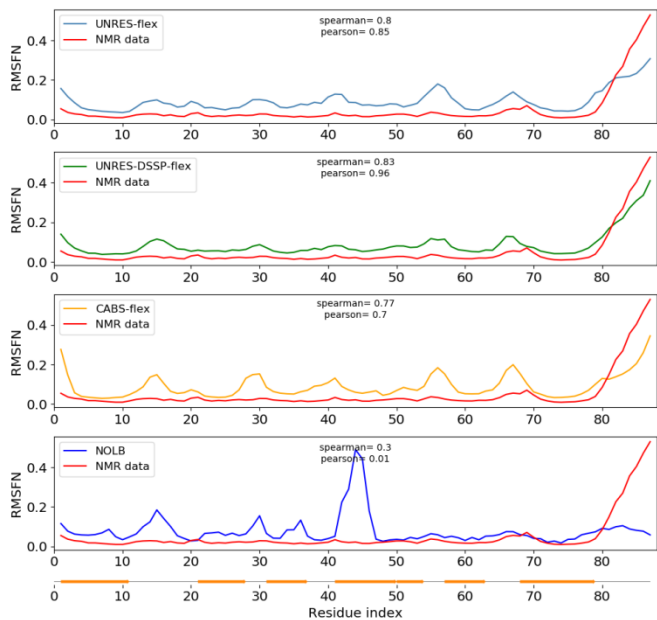

2L09 whole RMSFN profiles

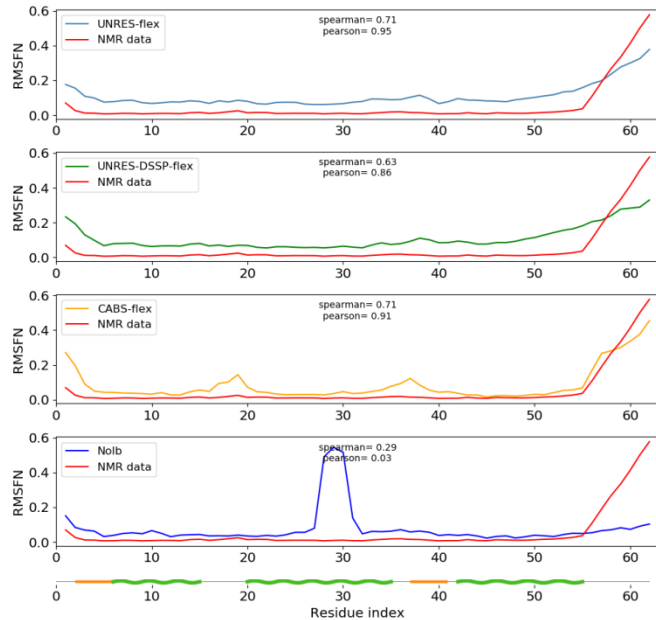

2LGN whole RMSFN profiles

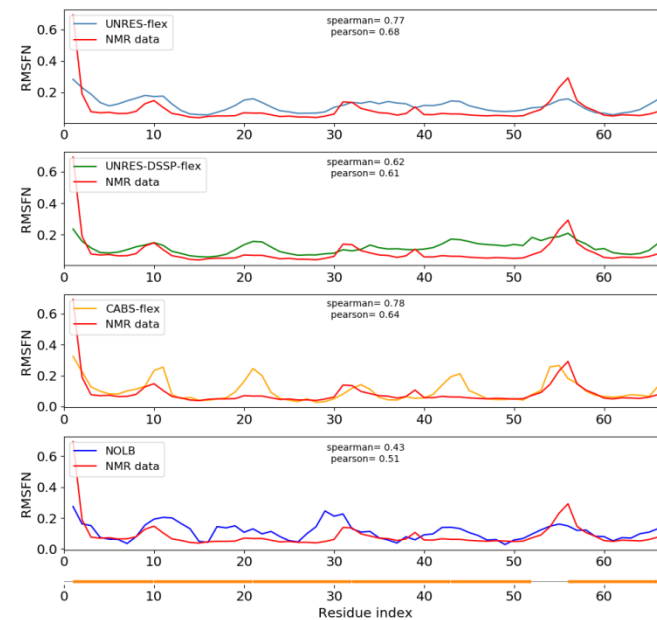

2LVC whole RMSFN profiles

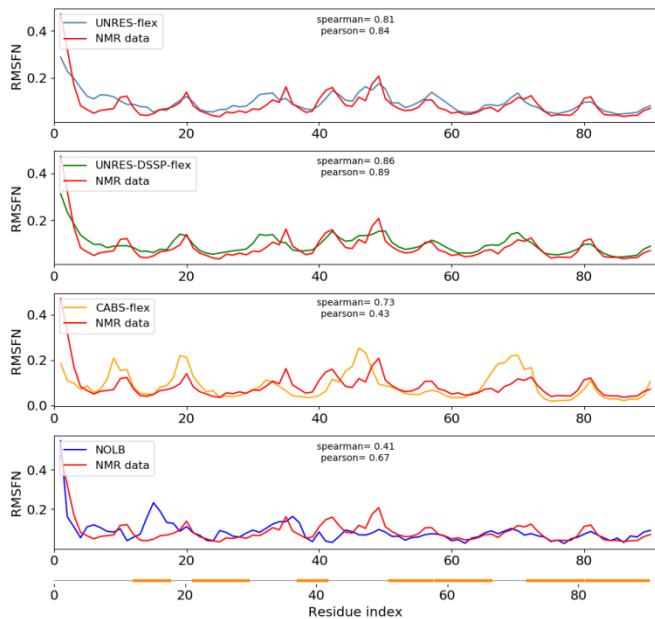

2LZM whole RMSFN profiles

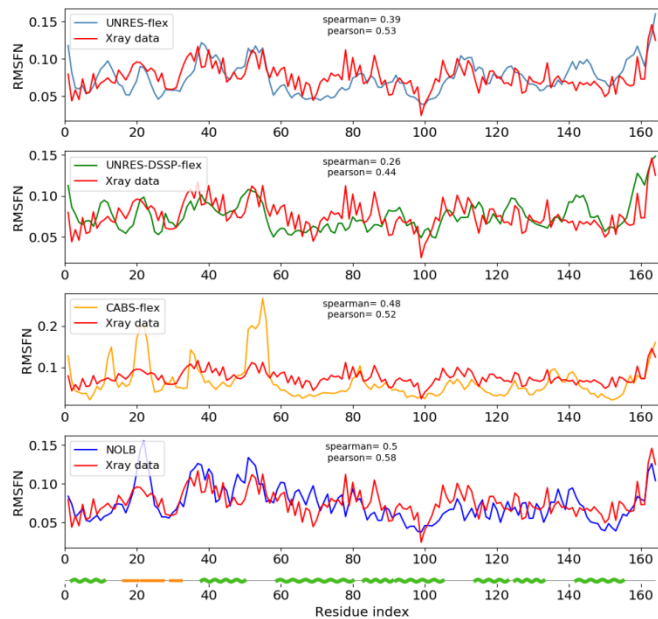

2M6Q whole RMSFN profiles

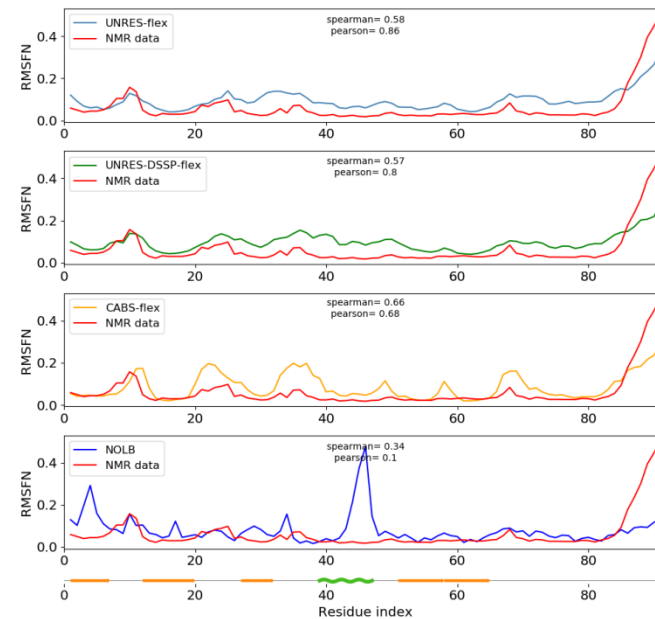

2MQ8 whole RMSFN profiles

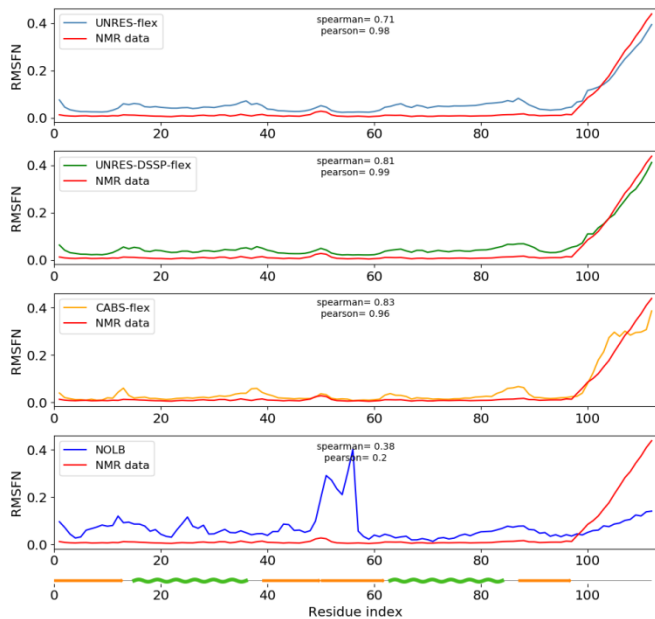

2N2U whole RMSFN profiles

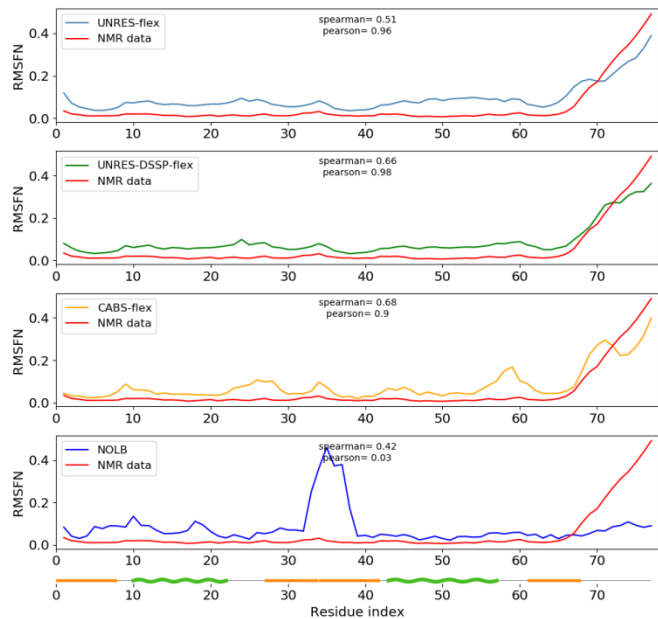

2PTL whole RMSFN profiles

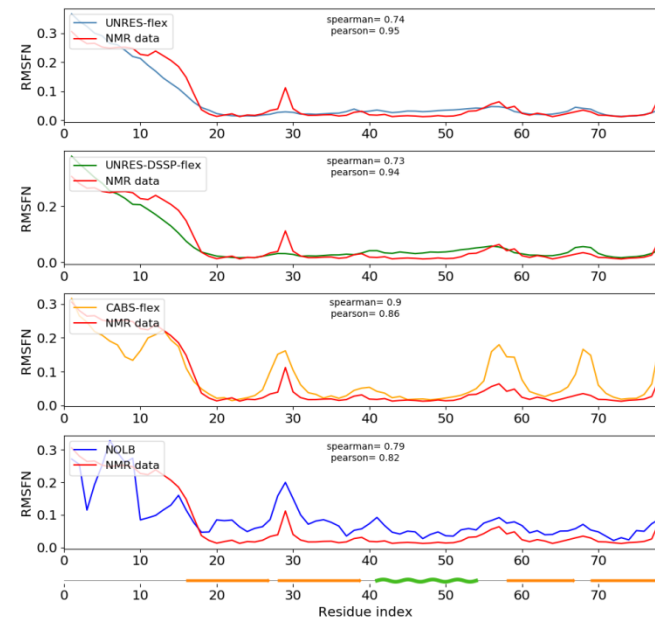

2RGF whole RMSFN profiles

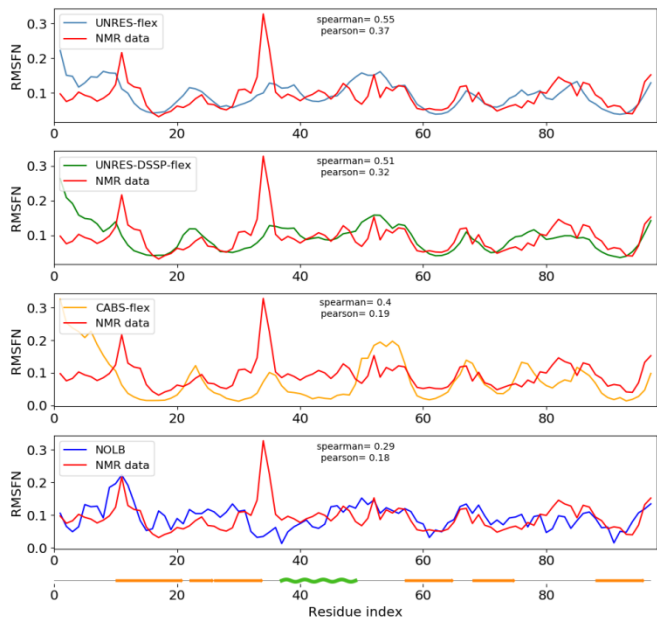

2YGS whole RMSFN profiles

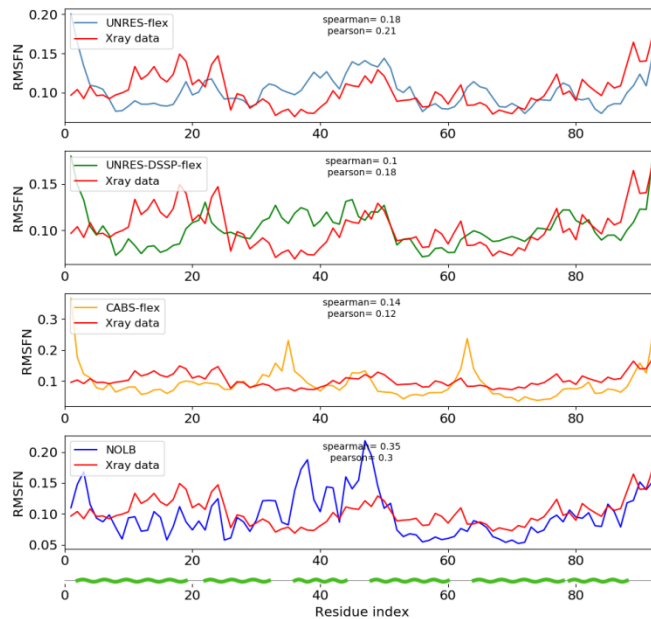

3CI2 whole RMSFN profiles

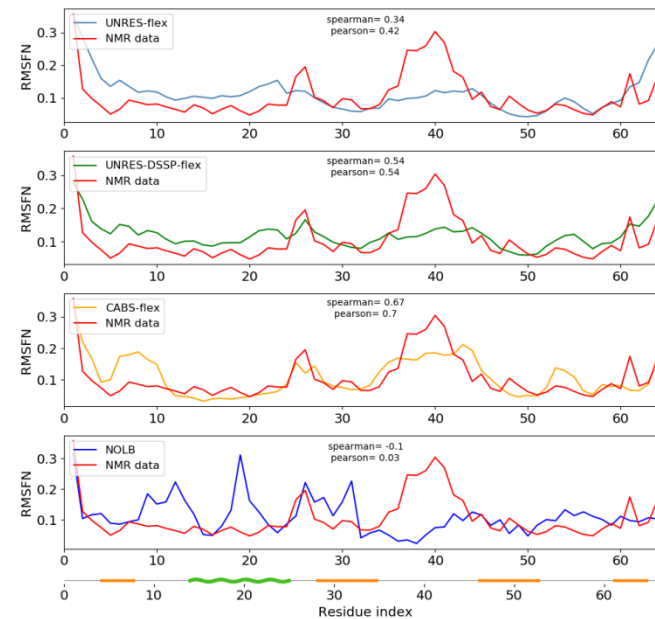

3E8Y whole RMSFN profiles

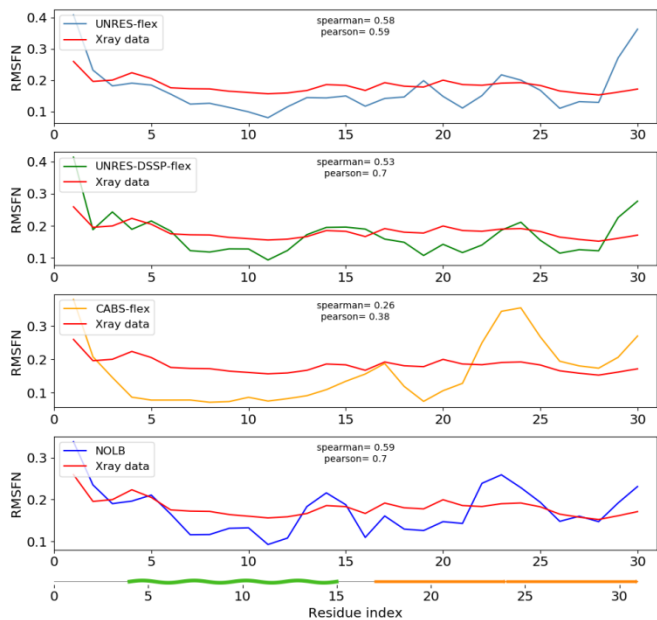

3ICB whole RMSFN profiles

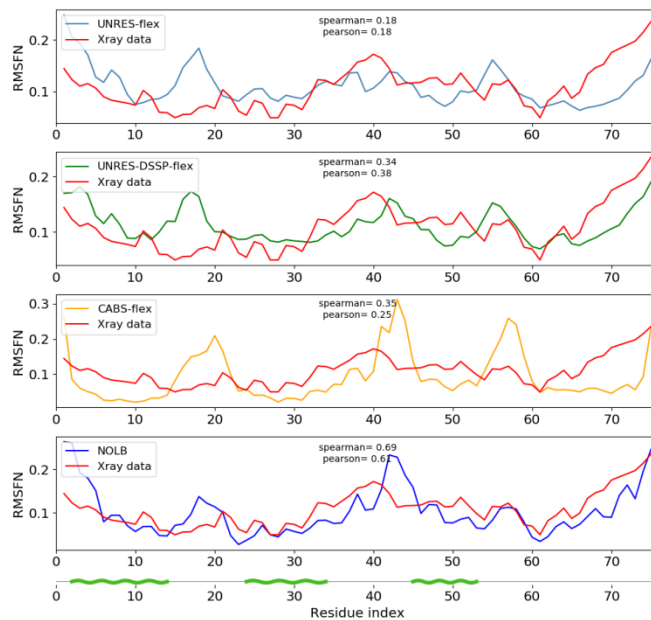

3KYW whole RMSFN profiles

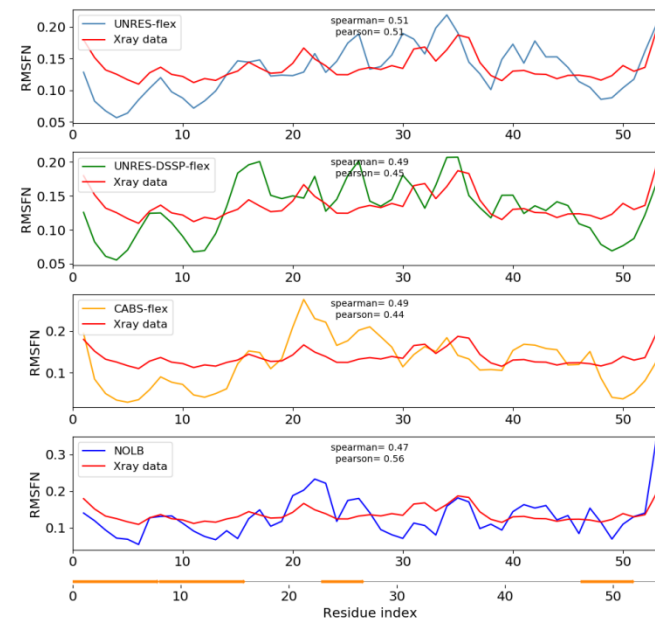

3KYY whole RMSFN profiles

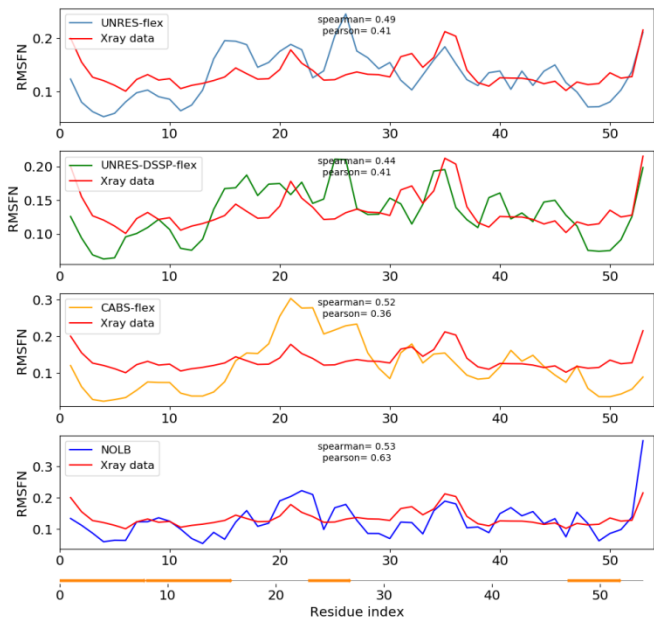

3NCM whole RMSFN profiles

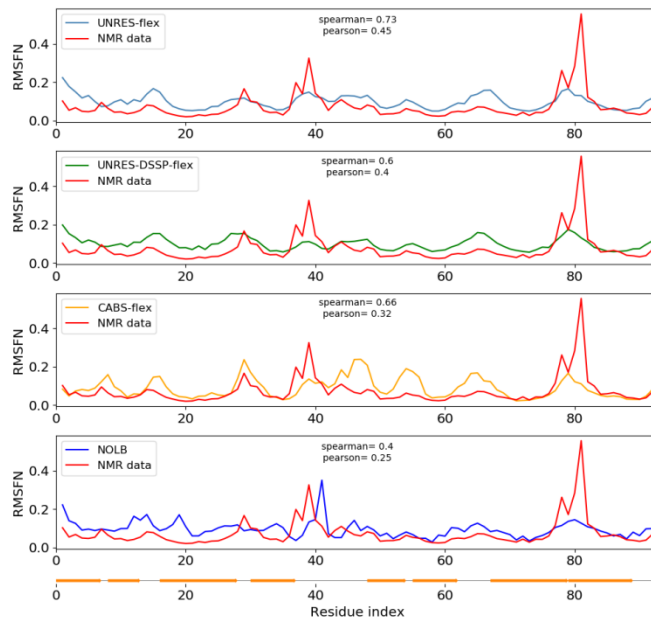

3PUC whole RMSFN profiles

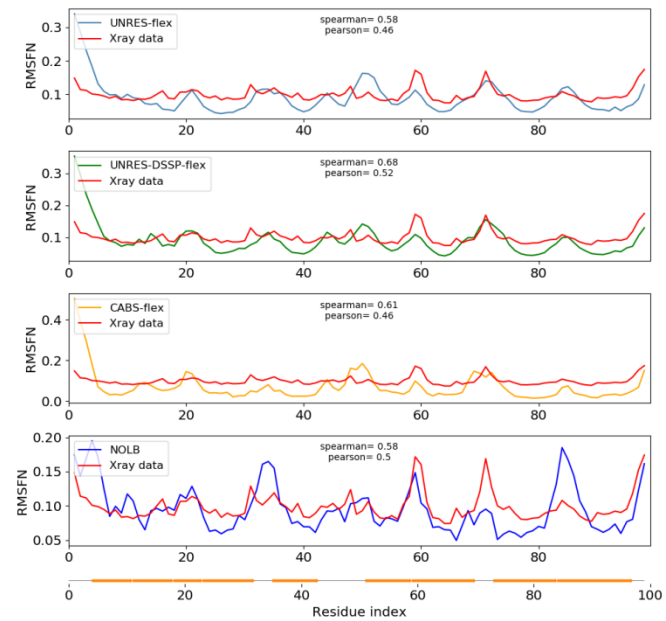

3WFW whole RMSFN profiles

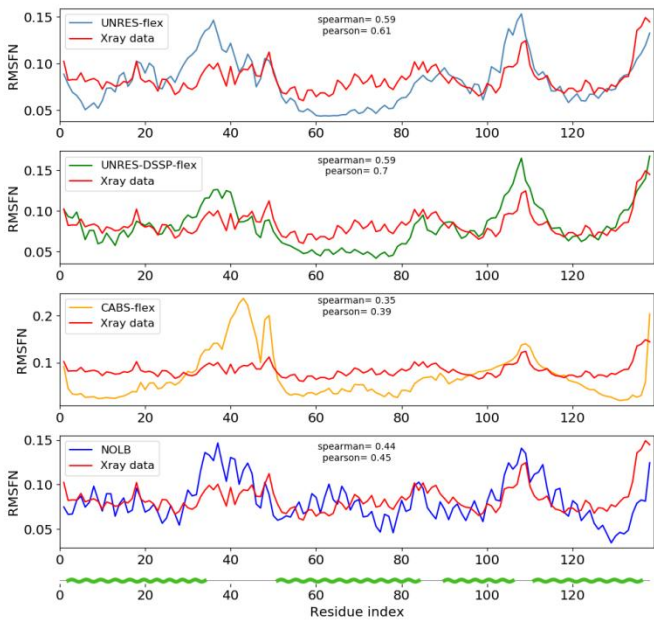

4F98 whole RMSFN profiles

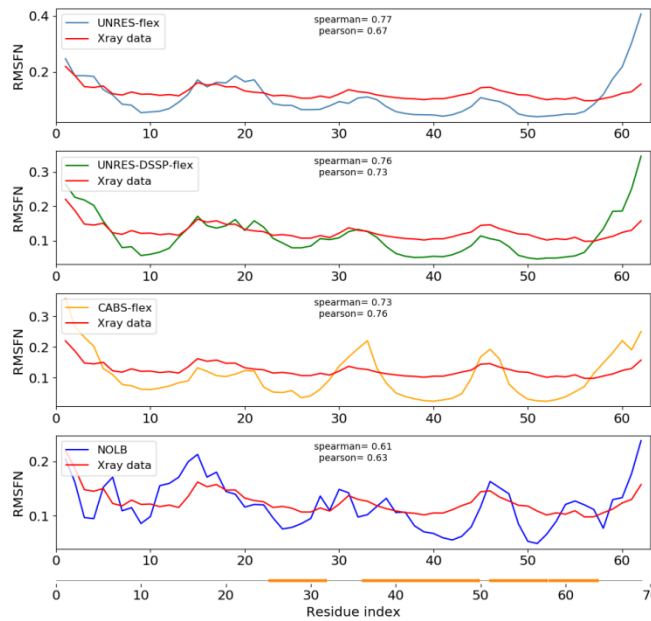

4M9O whole RMSFN profiles

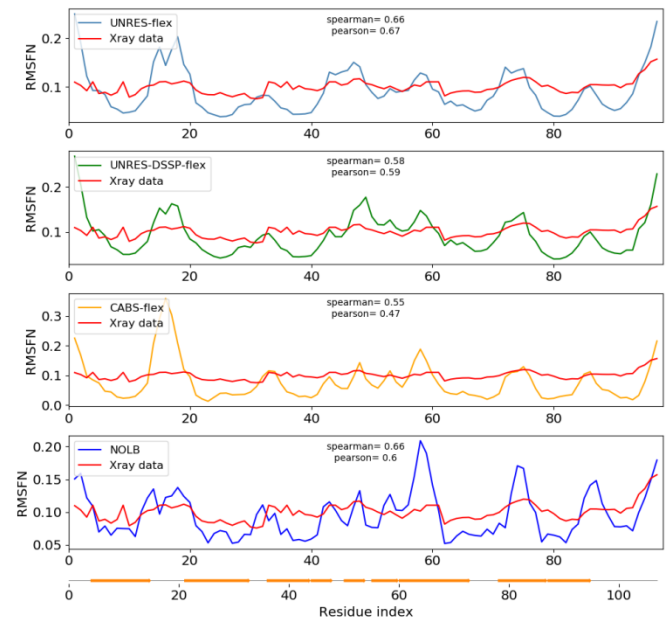

4N6T whole RMSFN profiles

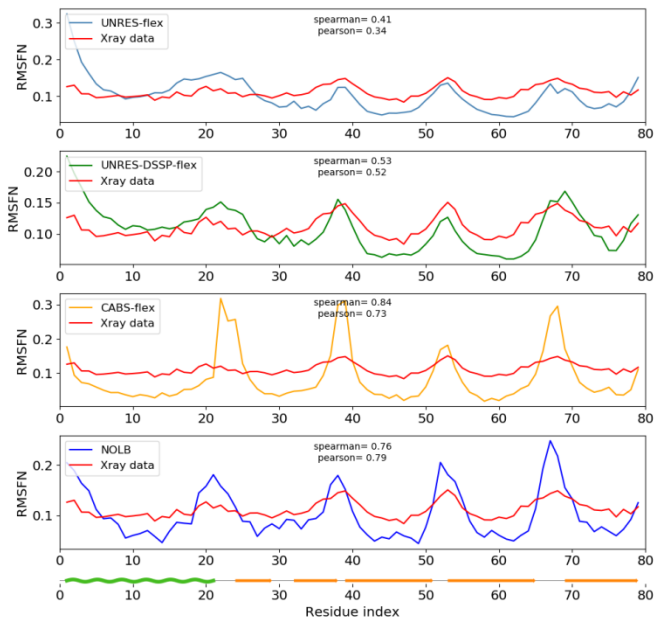

4OZU whole RMSFN profiles

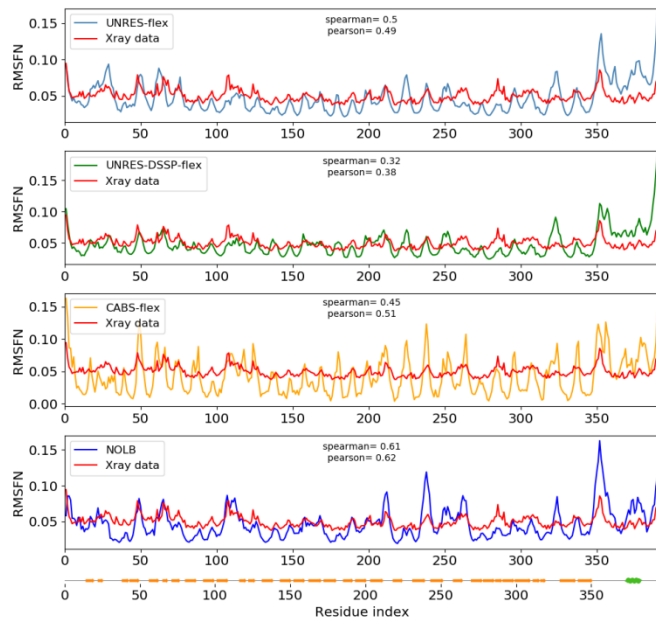

4QRL whole RMSFN profiles

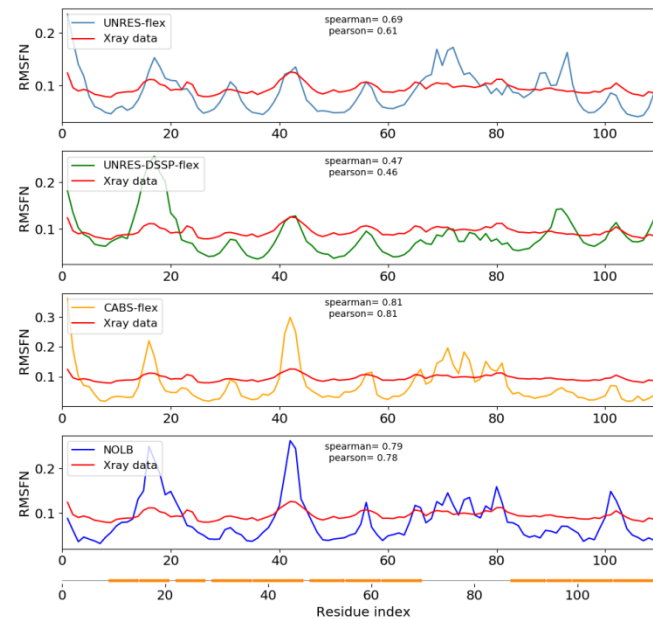

4R7E whole RMSFN profiles

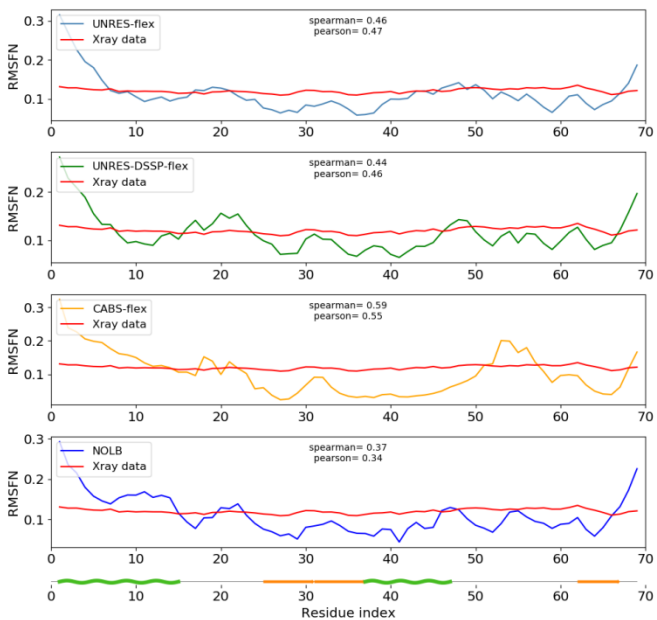

4RTE whole RMSFN profiles

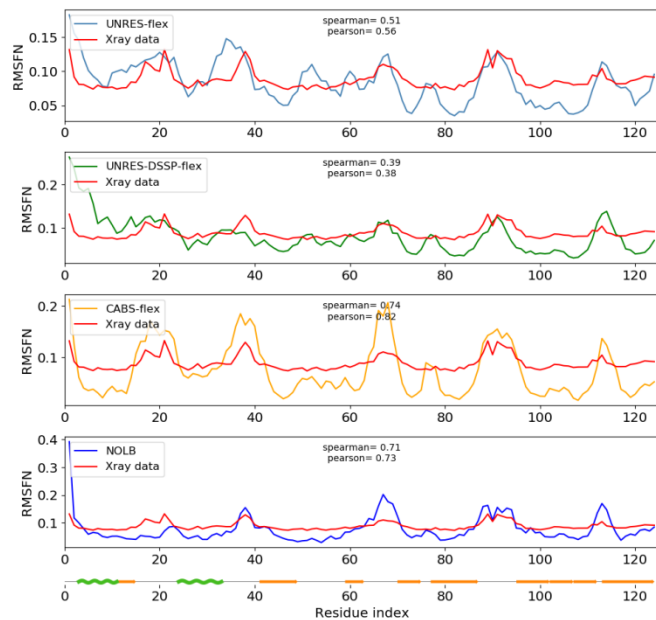

5D14 whole RMSFN profiles

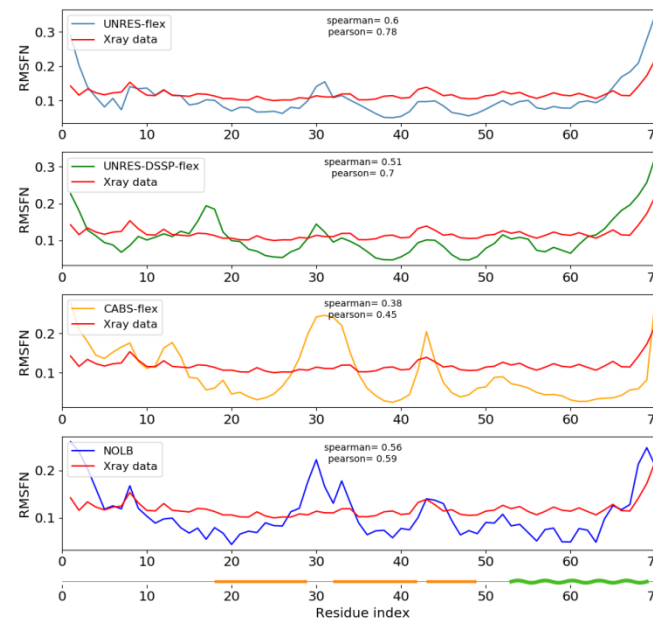



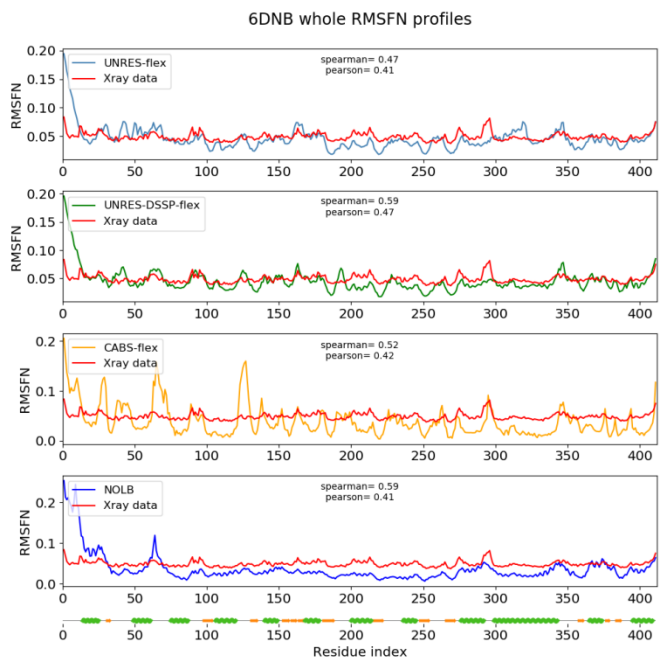

**Figure S3.** Scatter plots of the Pearson ( $r_p$ ) and Spearman ( $r_s$ ) coefficients between the experimental and predicted fluctuation profiles in chain length for the NMR (A-D) and X-ray (E-H) structures and the UNRES-flex (A, E), UNRES-DSSP-flex (B, F), CABS-flex (C,G), and NOLB (D, H) prediction methods.

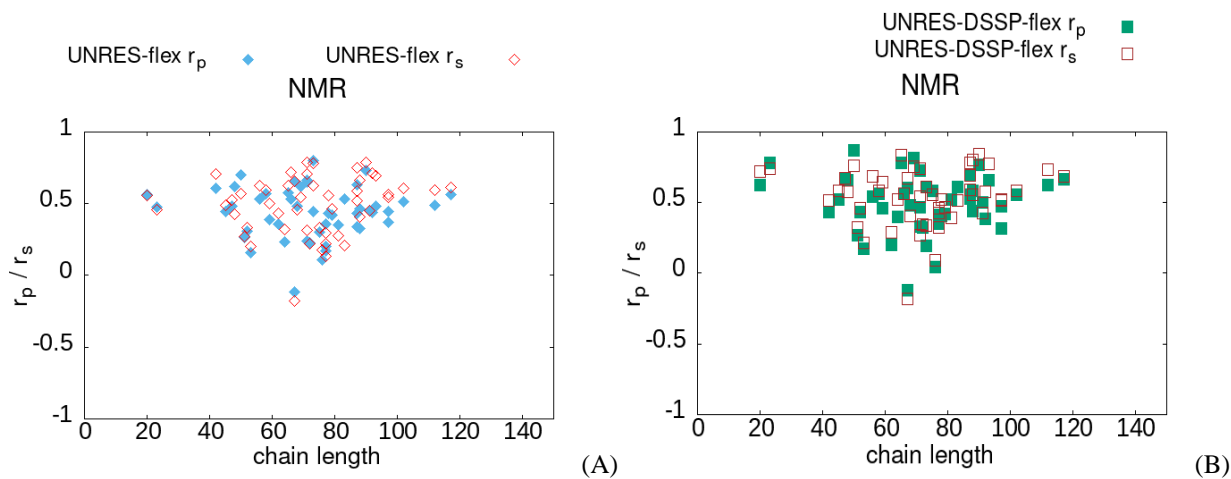

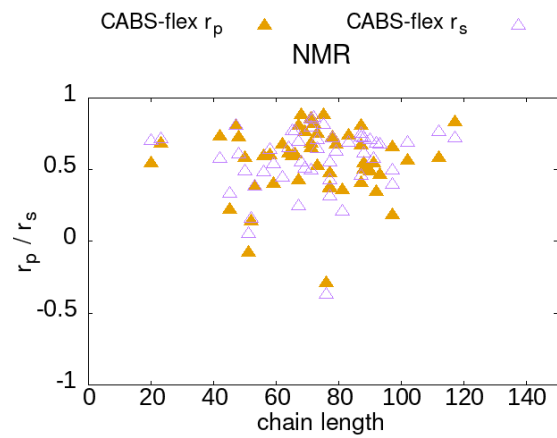

(C)

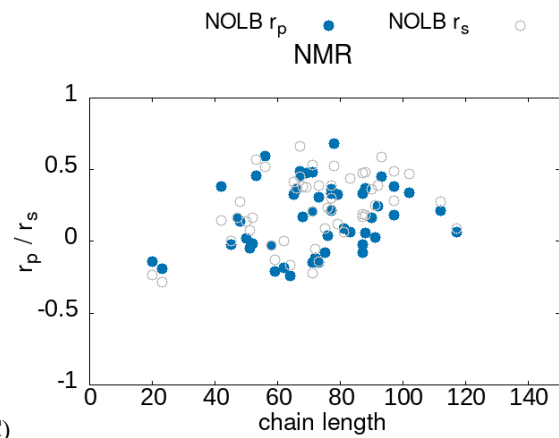

(D)

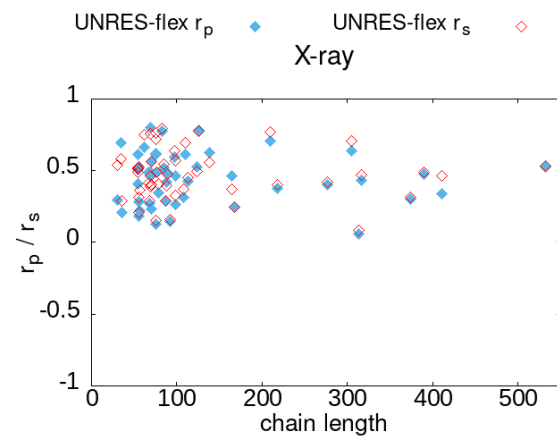

(E)

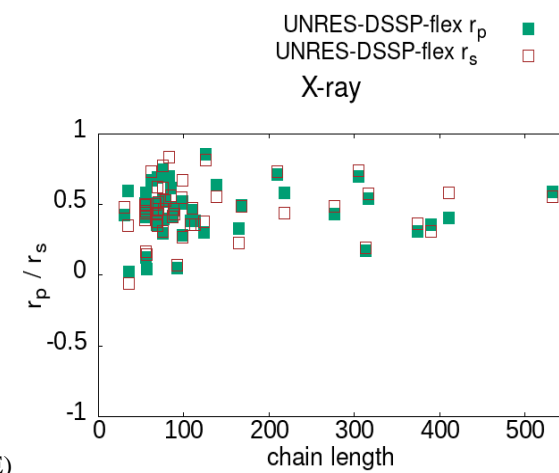

(F)

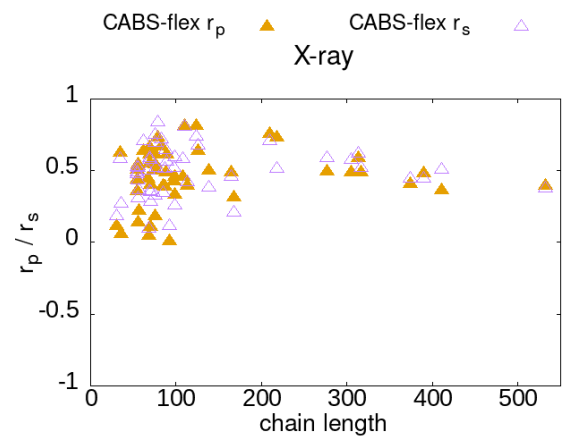

(G)

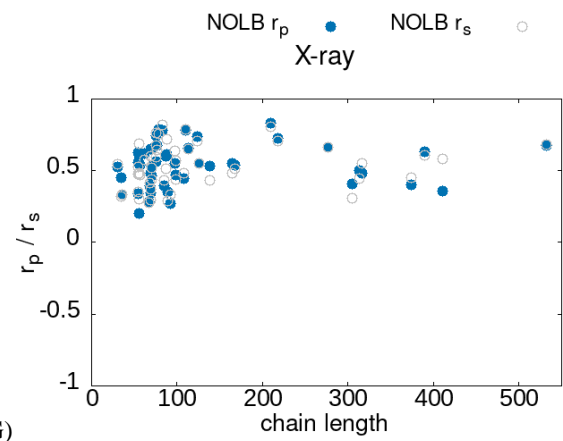

(H)
